# Supplementary material for: Rare coding variant architecture and gene discovery from 130,000 sequenced cases of atrial fibrillation
Source: Research Square preprint supplement (doi:10.21203/rs.3.rs-9191644/v1), 2026-05-04
Supplement: Supplementary file 1 [file 16621c1e5627dffec84aa485.xlsx]

## Sheet: ST1 Dataset characteristics
Supplementary Table 1: Baseline characteristics for each contributing discovery dataset
Discovery Dataset	Cases / control group	N	Genetically-inferred Sex				Genetically inferred ancestry		Baseline age			Age at AF onset			HF				MI				Hypertension				Diabetes
			N females	N females %	N males	N males %	N EUR	N EUR %	N baseline age available	N baseline age available %	Baseline age in years, mean (SD)	N age at AF available	N age at AF available %	Age at AF in years, mean (SD)	N HF status available	N HF status available %	N with HF	N with HF %	N MI status available	N MI status available %	N with MI	N with MI %	N Hypertension status available	N Hypertension status available %	N with Hypertension	N with Hypertension %	N Diabetes status available	N Diabetes status available %	N with Diabetes	N with Diabetes %
UK Biobank	AF cases	40486	14996	37.04	25490	62.96	36375	89.85	40486	100	62.37 (6.13)	40486	100	68.10 (8.5)	40414	99.82	11141	27.57	40486	100	2495	6.16	40486	100	27566	68.09	40486	100	8355	20.64
	Referents	447431	249486	55.76	197945	44.24	391225	87.44	447431	100	56.57 (8.07)	NA	NA	NA	447390	99.99	9660	2.16	447431	100	5658	1.26	447431	100	156231	34.92	447431	100	34748	7.77
CCDG-WES	AF cases	34586	12332	35.66	22244	64.32	26461	76.51	32629	94.34	68.48 (10.47)	14893	43.06	63.91 (12.19)	31977	92.46	12732	39.96	31601	91.37	6120	19.37	32003	92.53	26649	83.27	31643	91.49	10403	32.88
	Referents	52714	23910	45.36	28795	54.62	35814	67.94	52714	100	55.74 (16.02)	NA	NA	NA	52683	99.94	4138	7.95	52707	99.99	16699	31.68	52703	99.98	30078	57.07	52681	99.94	17988	34.15
GHS MyCode	AF cases	19733	8675	43.96	11058	56.04	19392	98.27	19733	100	74.73 (12.06)	19732	99.99	67.87 (11.56)	19733	100	11341	57.47	19733	100	6178	31.31	19733	100	18226	92.36	19733	100	9852	49.93
	Referents	133605	84568	63.3	49037	36.7	126169	94.43	133605	100	55.05 (18.21)	NA	NA	NA	133605	100	12034	9.01	133605	100	10949	8.19	133605	100	76616	57.34	133605	100	36508	27.33
TOPMed-CCDG	AF cases	11166	3945	35.33	7221	64.67	10404	93.18	11166	100	59.31 (12.54)	11034	98.82	58.95 (16.50)	11099	99.4	3040	27.39	11094	99.36	1249	11.26	11013	98.63	6843	62.14	11134	99.71	2218	19.92
	Referents	25806	14961	57.97	10845	42.03	13974	54.15	25806	100	57.25 (13.61)	NA		NA	25800	99.98	2489	9.65	25802	99.98	2071	8.03	25300	98.04	14247	56.31	25771	99.86	7037	27.31
All of Us (V7_noMA_only)	AF cases	10264	4469	43.54	5795	56.46	7404	72.14	10264	100	67.51 (12.07)	10263	99.99	64.518 (12.34)	10264	100	4536	44.19	10264	100	2466	24.03	10264	100	8246	80.34	10264	100	3859	37.6
	Referents	158096	97302	61.55	60794	38.45	80392	50.85	158096	100	51.30 (16.47)	NA	NA	NA	158096	100	7520	4.76	158096	100	5670	3.59	158096	100	54964	34.77	158096	100	25430	16.09
MGB	AF cases	4369	1645	37.65	2724	62.35	3918	89.68	4369	100	67.28 (12.45)	4369	100	66.37 (13.27)	4369	100	1971	45.11	4369	100	1537	35.18	4369	100	4032	92.29	4369	100	2151	49.23
	Referents	17564	10386	59.13	71780	408.68	14681	83.59	17564	100	52.89 (16.79)	NA	NA	NA	17564	100	922	5.25	17564	100	1108	6.31	17564	100	9331	53.13	17564	100	4348	24.76
FOURIER	AF cases	1394	324	23.24	1070	76.76	1305	93.62	1394	100	67.14 (7.93)	0	0	NA	1394	100	560	40.17	1394	100	1061	76.11	1394	100	1199	86.01	1394	100	515	36.94
	Referents	14597	3507	24.03	11090	75.97	12668	86.78	14597	100	62.02 (8.92)	NA	NA	NA	14597	100	3111	21.31	14597	100	11951	81.87	14597	100	11621	79.62	14597	100	5075	34.77
DECLARE	AF cases	1108	306	27.62	802	72.38	980	88.45	1108	100	66.02 (6.84)	424	38.27	67.73 (6.94)	1108	100	392	35.38	1108	100	371	33.48	1108	100	1047	94.49	1108	100	1094	98.74
	Referents	11302	4297	38.02	7005	61.98	7654	67.72	11302	100	63.57 (6.74)	NA	NA	NA	11302	100	996	8.81	11302	100	2537	22.45	11302	100	10086	89.24	11302	100	11017	97.48
META-ANALYSIS	AF cases	123106	49968	40.59	76404	62.06	106239	86.3	121149	98.41	66.45	101201	82.21	66.09	120358	97.77	45713	37.13	120049	97.52	21477	17.45	120370	97.78	93808	76.2	120131	97.58	38447	31.23
	Referents	861115	484301	56.24	437291	50.78	682577	79.27	861115	100	55.45	NA	NA	NA	861037	99.99	40870	4.75	861104	100	56643	6.58	860598	99.94	363174	42.17	861047	99.99	142151	16.51
Note: In the All of Us discovery dataset, samples were restricted to those included in the version 7 release, and removing samples with ZIP codes from Massachusetts; in that dataset, sex was determined by self-report.
Replication Dataset	Cases / control group	N
All of Us (AllofUs_V8only_noMA)	AF cases	6513
	Referents	96848
Genomics Englang 100,000 Genomes	AF cases	3387
	Referents	72716
META-ANALYSIS	AF cases	9900
	Referents	169564
Note: In the All of Us replication dataset, samples were restricted to those included in the version 8 release, and removing samples with ZIP codes from Massachusetts Abbreviations: N, number; EUR, European genetic ancestry; AF, atrial fibrillation; SD, standard deviation; HF, heart failure; MI, myocardial infarction;

## Sheet: ST2 Discovery burden models
Supplementary Table 2: Overview of analysis methods and approaches used in each discovery dataset
Dataset	REGENIE step 1						REGENIE step 2
	version	covariates	approach	genomic data source	genomic data filtering	N variants used	version	covariates	model	genomic data source	genomic data filtering	minimum cMAC
UK Biobank	v3.1.3	age, age^2, sex, sequencing_center, PC1-20	binary; leave-one-out-cross-validation	WGS	Base QC**; MAF>0.5%, LD pruned	650101	v3.1.3	age, age^2, sex, sequencing_center, PC1-20, PRSregenie	approximate Firth's model with back-computation of SE	WGS	Base QC**	10
CCDG-WES	v3.2.2	age, age^2, sex, CAD_Trial*, PC1-16	binary; leave-one-out-cross-validation	WES	Base QC**; MAF>0.5%	265083	v3.2.2	age, age^2, sex, CAD_Trial*, PC1-16, PRSregenie	approximate Firth's model with back-computation of SE	WES	Base QC**	5
GHS MyCode	v3.4.1	age, age^2, sex, age * sex, age^2 * sex, sequencing platform, PC1-10	binary; leave-one-out-cross-validation	array (imputation)	Base QC**; LD pruned	483129	v3.4.1	age, age^2, sex, age * sex, age^2 * sex, sequencing platform, PC1-10, PRSregenie	approximate Firth's model with back-computation of SE	WES	Base QC**	10
TOPMed-CCDG	v3.2.2	age, age^2, sex, PC1-11	binary; leave-one-out-cross-validation	WGS	Base QC**; MAF>0.5%, coding regions	470122	v3.2.2	age, age^2, sex, PC1-11, PRSregenie	approximate Firth's model with back-computation of SE	WGS	Base QC**	5
All of Us (V7_only)	v3.2.2	age, age^2, sex, PC1-16	binary; leave-one-out-cross-validation	WGS	Base QC (ACAF file)**; LD pruned	460525	v3.2.2	age, age^2, sex, PC1-16, PRSregenie	approximate Firth's model with back-computation of SE	WGS	Base QC (exome file)**	20
MGB	v3.2.2	age, age^2, sex, PC1-16	binary; leave-one-out-cross-validation	WES	Base QC**; MAF>0.5%	217156	v3.2.2	age, age^2, sex, PC1-16, PRSregenie	approximate Firth's model with back-computation of SE	WES	Base QC**	10
FOURIER	v3.2.2	age, age^2, sex, PC1-16	binary; leave-one-out-cross-validation	WES	Base QC**; MAF>0.5%	148595	v3.2.2	age, age^2, sex, PC1-16, PRSregenie	approximate Firth's model with back-computation of SE	WES	Base QC**	10
DECLARE	v3.2.2	age, age^2, sex, PC1-16	binary; leave-one-out-cross-validation	WES	Base QC**; MAF>0.5%	245320	v3.2.2	age, age^2, sex, PC1-16, PRSregenie	approximate Firth's model with back-computation of SE	WES	Base QC**	10
Note: * CAD_Trial is a dummy variable indicating whether samples were ascertained through clinical trials for atheresclerosis. ** the base QC used for a given genomic dataset is described in the Supplementary Note. Abbreviations: N, number; cMAC, cumulative minor allele count; WGS, whole-genome-sequencing; WES, exome sequencing; QC, quality-control; LD, linkage disequilibrium; PC, principal compo…

## Sheet: ST3 Burden Sensitivity P<0.005
Supplementary Table 3: Detailed RVAS results including sensitivity analyses for all genes reaching P<0.005 in discovery
GENE ENSEMBL ID	GENE NAME	CHROM	GENPOS	MAIN RESULTS									VARIANTS WITH MAF<0.1% ONLY									PTV VARIANTS ONLY									MISSENSE VARIANTS ONLY									MALE GENETIC SEX ONLY									FEMALE GENETIC SEX ONLY
				Cauchy P-value	Best mask								Cauchy P-value	Best mask								Cauchy P-value	Best mask								Cauchy P-value	Best mask								Cauchy P-value	Best mask								Cauchy P-value
					Mask	Beta	SE	OR [95% CI]	P-value	cMAC	Direction in studies	Heterogeneity P-value		Mask	Beta	SE	OR [95% CI]	P-value	cMAC	Direction in studies	Heterogeneity P-value	P-value	Mask	Beta	SE	OR [95% CI]	P-value	cMAC	Direction in studies	Heterogeneity P-value	P-value	Mask	Beta	SE	OR [95% CI]	P-value	cMAC	Direction in studies	Heterogeneity P-value	P-value	Mask	Beta	SE	OR [95% CI]	P-value	cMAC	Direction in studies	Heterogeneity P-value	P-value
ENSG00000155657	TTN	2	178527500	3.72e-105	PTV_missense_3_PP.1e-05	0.8967	0.04	2.5 [2.3; 2.7]	3.11e-106	5788	++++++++	0.9135	2.48e-105	PTV_missense_3_PP.1e-05	0.8967	0.04	2.5 [2.3; 2.7]	3.11e-106	5788	++++++++	0.9135	1.86e-105	PTV.1e-05	0.8967	0.04	2.5 [2.3; 2.7]	3.11e-106	5788	++++++++	0.9135	0.0755254	missense_REVEL_PP.0.001	0.057	0.0241	1.1 [1; 1.1]	0.0163	22410	+++-+--+	0.8357	1.53e-71	PTV_missense_3_PP.1e-05	0.9708	0.0529	2.6 [2.4; 2.9]	1.28e-72	2709	++++++++	0.6777	1.12e-33
ENSG00000140986	RPL3L	16	1945175	5.23e-26	PTV_missense_any_PP.0.01	0.2199	0.0196	1.2 [1.2; 1.3]	1.19e-27	31593	+++++++-	0.2354	3.59e-07	PTV_missense_any_PP.0.001	0.21	0.0356	1.2 [1.2; 1.3]	1.42e-08	9633	+++++-++	0.3227	7.41e-13	PTV.0.01	0.334	0.0437	1.4 [1.3; 1.5]	2.47e-13	5622	++++++++	0.703	3.57e-17	missense_any_PP.0.01	0.1941	0.0217	1.2 [1.2; 1.3]	2.6e-18	26091	+++++++-	0.4584	7.04e-18	PTV_missense_any_PP.0.01	0.2376	0.0257	1.3 [1.2; 1.3]	1.55e-19	14264	+++++++-	0.2738	9.29e-09
ENSG00000160789	LMNA	1	156120000	1.5e-25	PTVnoflag_missense_REVEL_PP.1e-05	1.3873	0.1246	4 [3.1; 5.1]	9.14e-27	530	+++++++?	0.5575	1.43e-25	PTVnoflag_missense_REVEL_PP.1e-05	1.3873	0.1246	4 [3.1; 5.1]	9.14e-27	530	+++++++?	0.5575	2.36e-11	PTVnoflag.1e-05	2.3595	0.3385	10.6 [5.5; 20.6]	7.48e-12	64	++++????	0.1286	3.38e-19	missense_AlphaMissense_PP.0.001	0.7239	0.0767	2.1 [1.8; 2.4]	5.19e-20	1708	+++?+++-	0.5424	1.57e-12	PTV_missense_AlphaMissense_PP.0.001	0.7573	0.0978	2.1 [1.8; 2.6]	6.49e-14	825	+++++++-	0.205	4.44e-16
ENSG00000134571	MYBPC3	11	4.73318e+07	2.2e-21	PTV_missense_popEVE_PP.0.001	1.1409	0.1128	3.1 [2.5; 3.9]	2.89e-22	677	++++++??	0.2918	2.94e-21	PTV_missense_popEVE_PP.0.001	1.1409	0.1128	3.1 [2.5; 3.9]	2.89e-22	677	++++++??	0.2918	8.57e-22	PTV.0.001	1.1409	0.1128	3.1 [2.5; 3.9]	2.89e-22	677	++++++??	0.2918	0.044575	missense_PAI3D_PP.0.001	0.1891	0.0762	1.2 [1; 1.4]	0.0107728	2343	+++?+++-	0.896	3.9e-14	PTV_missense_popEVE_PP.0.001	1.1954	0.1449	3.3 [2.5; 4.4]	5.11e-15	333	++++++?+	0.2021	3.21e-08
ENSG00000117139	KDM5B	1	202728750	2.44e-15	PTVnoflag_missense_REVEL_PP.0.01	0.6448	0.0753	1.9 [1.6; 2.2]	4.8e-17	1881	+++++-++	0.1334	1.18e-14	PTVnoflag_missense_REVEL_PP.0.001	0.6358	0.0762	1.9 [1.6; 2.2]	3.05e-16	1815	+++++-++	0.08052	1.55e-11	PTVnoflag.0.01	0.7934	0.1103	2.2 [1.8; 2.7]	5.91e-12	861	+++++??+	0.564	7.58e-07	missense_REVEL_PP.0.001	0.569	0.1054	1.8 [1.4; 2.2]	1.35e-07	1007	+++++-++	0.4137	6.71e-08	PTVnoflag_missense_AlphaMissense_PP.0.01	0.4885	0.0796	1.6 [1.4; 1.9]	3.42e-09	1363	+++++-++	0.2277	8.42e-09
ENSG00000057294	PKP2	12	32796625	1.79e-14	PTV_missense_REVEL_PP.0.001	0.5829	0.0746	1.8 [1.5; 2.1]	2.53e-15	2080	++++++--	0.06288	2.19e-14	PTV_missense_REVEL_PP.0.001	0.5829	0.0746	1.8 [1.5; 2.1]	2.53e-15	2080	++++++--	0.06288	1.29e-14	PTV.0.001	0.755	0.0965	2.1 [1.8; 2.6]	6.66e-15	1164	++++++??	0.145	0.00239512	missense_PAI3D_PP.1e-05	1.1331	0.3189	3.1 [1.7; 5.8]	0.000338033	91	++??????	0.2663	4.03e-06	PTV_missense_3_PP.0.001	0.5568	0.117	1.7 [1.4; 2.2]	1.1e-06	697	+++-++-+	0.4573	1.03e-09
ENSG00000159251	ACTC1	15	34790800	3.02e-09	PTV_missense_AlphaMissense_PP.0.001	1.1088	0.1689	3 [2.2; 4.2]	1.58e-10	365	+++++???	0.1145	3.62e-09	PTV_missense_AlphaMissense_PP.0.001	1.1088	0.1689	3 [2.2; 4.2]	1.58e-10	365	+++++???	0.1145	0.00815881	PTV.0.001	0.9475	0.3561	2.6 [1.3; 5.2]	0.00667638	77	+-+????	0.1051	1.95e-08	missense_AlphaMissense_PP.1e-05	1.6708	0.2648	5.3 [3.2; 8.9]	1.82e-09	141	+++?+???	0.7382	5.23e-05	PTV_missense_AlphaMissense_PP.0.001	1.0705	0.249	2.9 [1.8; 4.8]	1e-05	146	+++++???	0.2085	5.86e-05
ENSG00000135063	ENTREP1	9	69334625	1.36e-08	PTVnoflag_missense_PAI3D_PP.0.01	0.4782	0.0721	1.6 [1.4; 1.9]	3.29e-10	2207	++++++++	0.1343	2.51e-08	PTVnoflag_missense_PAI3D_PP.0.001	0.4776	0.0731	1.6 [1.4; 1.9]	5.82e-10	2119	+++++++-	0.1066	0.000214458	PTVnoflag.1e-05	0.9675	0.2299	2.6 [1.7; 4.1]	8.9e-05	184	+++++???	0.9956	2.62e-06	missense_PAI3D_PP.0.001	0.4707	0.0879	1.6 [1.3; 1.9]	5.84e-07	1375	++??+++-	0.03256	1.25e-06	PTVnoflag_missense_PAI3D_PP.0.01	0.5356	0.0928	1.7 [1.4; 2]	3.57e-08	1050	++++++++	0.3212	0.0170658
ENSG00000178209	PLEC	8	143916250	1.4e-08	PTV_missense_3_PP.1e-05	0.8218	0.1303	2.3 [1.8; 2.9]	2.59e-09	618	++++++++	0.5037	9.32e-09	PTV_missense_3_PP.1e-05	0.8218	0.1303	2.3 [1.8; 2.9]	2.59e-09	618	++++++++	0.5037	6.99e-09	PTV.1e-05	0.8218	0.1303	2.3 [1.8; 2.9]	2.59e-09	618	++++++++	0.5037	0.000504894	missense_AlphaMissense_PP.0.01	0.0803	0.0204	1.1 [1; 1.1]	6.94e-05	31843	+++?++++	0.6816	3.7e-07	PTV_missense_3_PP.1e-05	0.942	0.1668	2.6 [1.8; 3.6]	8.94e-08	300	++-+++++	0.5244	0.0218364
ENSG00000203867	RBM20	10	1.10683e+08	6.7e-08	PTVnoflag_missense_3_PP.0.001	0.687	0.1151	2 [1.6; 2.5]	4.02e-09	738	++++++-?	0.001897	8.87e-08	PTVnoflag_missense_3_PP.0.001	0.687	0.1151	2 [1.6; 2.5]	4.02e-09	738	++++++-?	0.001897	5.86e-05	PTVnoflag.0.001	0.615	0.1505	1.8 [1.4; 2.5]	3.89e-05	440	++++-???	0.007915	7.82e-05	missense_any_PP.0.01	0.1702	0.0381	1.2 [1.1; 1.3]	1.38e-05	8107	+++++++-	0.3287	7.4e-05	PTV_missense_3_PP.0.001	0.7046	0.1522	2 [1.5; 2.7]	7.45e-06	349	++++++-+	0.04924	0.0001232
ENSG00000183230	CTNNA3	10	65920375	7.01e-08	PTV_missense_3_PP.0.001	0.5488	0.095	1.7 [1.4; 2.1]	1.79e-08	1160	+++++-++	0.6308	9.49e-08	PTV_missense_3_PP.0.001	0.5488	0.095	1.7 [1.4; 2.1]	1.79e-08	1160	+++++-++	0.6308	3.74e-08	PTV.0.001	0.5611	0.099	1.8 [1.4; 2.1]	2.5e-08	1059	+++++--+	0.4503	0.0125978	missense_PAI3D_PP.0.01	0.1716	0.051	1.2 [1.1; 1.3]	0.00122375	4740	+++?+-++	0.6537	1.68e-07	PTV_missense_REVEL_PP.0.001	0.7028	0.1234	2 [1.6; 2.6]	1.58e-08	542	+++++-++	0.4837	0.017297
ENSG00000183873	SCN5A	3	3.85504e+07	2.08e-07	missense_AlphaMissense_PP.0.01	-0.2314	0.0394	0.8 [0.7; 0.9]	4.2e-09	9762	---?----	0.9864	8.34e-06	missense_AlphaMissense_PP.0.001	-0.2367	0.047	0.8 [0.7; 0.9]	2.65e-07	6321	---?----	0.8055	0.0110838	PTVnoflag.1e-05	0.6004	0.21	1.8 [1.2; 2.8]	0.00836273	196	++-++???	0.09495	7.02e-08	missense_AlphaMissense_PP.0.01	-0.2314	0.0394	0.8 [0.7; 0.9]	4.2e-09	9762	---?----	0.9864	1.23e-05	missense_AlphaMissense_PP.0.01	-0.2605	0.0519	0.8 [0.7; 0.9]	3.39e-07	4401	---?----	0.373	0.0070749
ENSG00000217128	FNIP1	5	131649000	4.12e-07	PTV_missense_popEVE_PP.0.001	1.3246	0.2432	3.8 [2.3; 6.1]	1.07e-07	152	+++++???	0.2894	5.47e-07	PTV_missense_popEVE_PP.0.001	1.3246	0.2432	3.8 [2.3; 6.1]	1.07e-07	152	+++++???	0.2894	1.61e-07	PTV.0.001	1.3246	0.2432	3.8 [2.3; 6.1]	1.07e-07	152	+++++???	0.2894	0.568331	missense_any_PP.1e-05	0.275	0.1305	1.3 [1; 1.7]	0.0551571	714	+++?--+?	0.2328	0.0473229	PTV_missense_REVEL_PP.0.001	0.7447	0.2781	2.1 [1.2; 3.6]	0.00724869	120	+++++???	0.8574	0.000535206
ENSG00000152518	ZFP36L2	2	43224400	7.96e-07	PTV_missense_3_PP.0.001	1.4813	0.2646	4.4 [2.6; 7.4]	8.3e-08	131	+++++???	0.7637	1.04e-06	PTV_missense_3_PP.0.001	1.4813	0.2646	4.4 [2.6; 7.4]	8.3e-08	131	+++++???	0.7637	9.38e-07	PTV.0.001	1.5374	0.2969	4.7 [2.6; 8.3]	6.36e-07	100	++?++???	0.7029	0.468275	missense_PAI3D_PP.0.001	0.4945	0.3156	1.6 [0.9; 3]	0.1171	100	+--?????	0.1266	0.00329006	PTV_missense_popEVE_PP.1e-05	1.598	0.5006	4.9 [1.9; 13.2]	0.00142595	27	++??????	0.9567	0.00542045
ENSG00000166147	FBN1	15	48421375	2.49e-06	PTV_missense_3_PP.1e-05	0.6393	0.1158	1.9 [1.5; 2.4]	6.73e-08	815	++++-+--	0.05904	1.66e-06	PTV_missense_3_PP.1e-05	0.6393	0.1158	1.9 [1.5; 2.4]	6.73e-08	815	++++-+--	0.05904	2.87e-05	PTV.1e-05	1.4913	0.3158	4.4 [2.4; 8.3]	9.59e-06	73	++++????	0.7914	0.000389704	missense_AlphaMissense_PP.1e-05	0.3915	0.0941	1.5 [1.2; 1.8]	4.74e-05	1308	+++?++-+	0.568	0.000332183	PTV_missense_3_PP.1e-05	0.6635	0.1516	1.9 [1.4; 2.6]	8.7e-06	394	++?+-+--	0.1569	1.16e-05
ENSG00000116641	DOCK7	1	6.24558e+07	4.52e-06	PTVnoflag_missense_popEVE_PP.1e-05	0.8188	0.1609	2.3 [1.7; 3.1]	6.81e-07	387	++++++??	0.6817	3.71e-06	PTVnoflag_missense_popEVE_PP.1e-05	0.8188	0.1609	2.3 [1.7; 3.1]	6.81e-07	387	++++++??	0.6817	1.83e-06	PTVnoflag.1e-05	0.8188	0.1609	2.3 [1.7; 3.1]	6.81e-07	387	++++??	0.6817	0.393239	missense_any_PP.1e-05	-0.1067	0.0736	0.9 [0.8; 1]	0.1473	2374	---+--+-	0.9072	0.00170427	PTVnoflag_missense_REVEL_PP.0.001	0.5024	0.1348	1.7 [1.3; 2.2]	0.000448869	458	+++-+-++	0.4999	0.000259604
ENSG00000175084	DES	2	219418750	9.65e-06	PTV_missense_PAI3D_PP.0.001	0.4915	0.099	1.6 [1.3; 2]	6.27e-07	1169	++++++-+	0.8982	1.22e-05	PTV_missense_PAI3D_PP.0.001	0.4915	0.099	1.6 [1.3; 2]	6.27e-07	1169	++++++-+	0.8982	6.35e-05	PTV.0.001	0.6859	0.165	2 [1.4; 2.7]	3.91e-05	353	++++--??	0.2367	0.0028255	missense_AlphaMissense_PP.0.01	0.2297	0.0706	1.3 [1.1; 1.4]	0.00136943	2941	+++?++-+	0.4824	0.00068975	PTV_missense_REVEL_PP.1e-05	0.701	0.1779	2 [1.4; 2.9]	6.42e-05	300	++++++-+	0.04801	0.00162059
ENSG00000244462	RBM12	20	35652600	1.21e-05	PTV_missense_3_PP.0.001	1.1814	0.2366	3.3 [2; 5.2]	3.53e-06	149	++++-???	0.003504	1.38e-05	PTV_missense_3_PP.0.001	1.1814	0.2366	3.3 [2; 5.2]	3.53e-06	149	++++-???	0.003504	6.8e-06	PTV.0.001	1.2255	0.2529	3.4 [2.1; 5.6]	5.46e-06	145	++++-???	0.003832	0.104435	missense_any_PP.1e-05	0.2537	0.1319	1.3 [1; 1.7]	0.05439	663	+++?-+-+	0.2232	0.000364306	PTV_missense_3_PP.1e-05	1.8652	0.4333	6.5 [2.8; 15.1]	7.86e-05	34	++??????	0.02605	0.00364827
ENSG00000169418	NPR1	1	153680000	1.35e-05	PTVnoflag_missense_any_PP.0.001	0.3066	0.061	1.4 [1.2; 1.5]	1.08e-06	3137	++++++--	0.361	1.8e-05	PTVnoflag_missense_any_PP.0.001	0.3066	0.061	1.4 [1.2; 1.5]	1.08e-06	3137	++++++--	0.361	0.341537	PTVnoflag.1e-05	0.2265	0.2226	1.3 [0.8; 1.9]	0.3088	259	+++--???	0.2243	8.45e-06	missense_any_PP.0.001	0.3368	0.0659	1.4 [1.2; 1.6]	1.14e-06	2623	++++++--	0.1169	0.00516489	PTV_missense_any_PP.0.001	0.3023	0.081	1.4 [1.2; 1.6]	0.000401978	1418	++++++--	0.1243	0.00301361
ENSG00000103024	NME3	16	1.77066e+06	2.88e-05	PTV_missense_3_PP.0.01	0.2224	0.0469	1.2 [1.1; 1.4]	4.15e-06	5010	++-+++-+	0.1892	0.923417	missense_any_PP.1e-05	0.3055	0.2078	1.4 [0.9; 2]	0.1416	274	+--?+???	0.3383	1.77e-05	PTV.0.01	0.2205	0.0473	1.2 [1.1; 1.4]	5.9e-06	4914	++-+++-+	0.1922	0.854274	missense_any_PP.1e-05	0.3055	0.2078	1.4 [0.9; 2]	0.1416	274	+--?+???	0.3383	0.000153829	PTV_missense_3_PP.0.01	0.2712	0.0614	1.3 [1.2; 1.5]	1.97e-05	2220	++++++-+	0.4721	0.755229
ENSG00000092054	MYH7	14	23413875	3.09e-05	missense_any_PP.1e-05	0.3678	0.0762	1.4 [1.2; 1.7]	9.87e-07	2018	+++++++-	0.2279	2.06e-05	missense_any_PP.1e-05	0.3678	0.0762	1.4 [1.2; 1.7]	9.87e-07	2018	+++++++-	0.2279	0.00510991	PTV.0.001	-0.3814	0.1329	0.7 [0.5; 0.9]	0.0033845	790	---+--?-	0.515	1.04e-05	missense_any_PP.1e-05	0.3678	0.0762	1.4 [1.2; 1.7]	9.87e-07	2018	+++++++-	0.2279	0.00498882	PTVnoflag_missense_popEVE_PP.1e-05	-0.8734	0.2742	0.4 [0.2; 0.7]	0.00114749	173	---+--??	0.526	0.000507682
ENSG00000116783	TNNI3K	1	74235750	3.4e-05	PTV_missense_any_PP.0.01	0.1333	0.0281	1.1 [1.1; 1.2]	3.45e-06	16045	+++++-++	0.8022	3.56e-05	missense_any_PP.0.001	0.227	0.0481	1.3 [1.1; 1.4]	4.17e-06	5333	++++++-+	0.4469	0.0523774	PTV.0.01	0.1231	0.0537	1.1 [1; 1.3]	0.0238828	4621	+++++-++	0.8319	2.31e-05	missense_any_PP.0.001	0.227	0.0481	1.3 [1.1; 1.4]	4.17e-06	5333	++++++-+	0.4469	8.92e-05	PTV_missense_AlphaMissense_PP.0.01	0.1759	0.0368	1.2 [1.1; 1.3]	3.26e-06	7215	+++++++-	0.9421	0.0163166
ENSG00000091640	SPAG7	17	4.95984e+06	3.44e-05	missense_PAI3D_PP.0.01	0.2538	0.0516	1.3 [1.2; 1.4]	2.09e-06	4368	+++?++-+	0.7748	0.161785	missense_PAI3D_PP.1e-05	1.1252	0.3718	3.1 [1.5; 6.4]	0.00961695	58	+-+?????	0.09326	0.828407	PTV.1e-05	0.443	0.5371	1.6 [0.5; 4.5]	0.4094	42	+-??????	0.4359	1.57e-05	missense_PAI3D_PP.0.01	0.2538	0.0516	1.3 [1.2; 1.4]	2.09e-06	4368	+++?++-+	0.7748	0.0182661	PTV_missense_PAI3D_PP.0.01	0.2155	0.0678	1.2 [1.1; 1.4]	0.00221173	1979	+++?+--+	0.6122	0.000830514
ENSG00000066827	ZFAT	8	134486250	3.61e-05	PTV_missense_AlphaMissense_PP.0.001	0.3281	0.0669	1.4 [1.2; 1.6]	2.12e-06	2563	++++++++	0.9825	4.05e-05	PTV_missense_AlphaMissense_PP.0.001	0.3281	0.0669	1.4 [1.2; 1.6]	2.12e-06	2563	++++++++	0.9825	0.121655	PTV.1e-05	0.5682	0.28	1.8 [1; 3.1]	0.0490079	145	+++++???	0.6108	2.93e-05	missense_AlphaMissense_PP.0.001	0.3459	0.0723	1.4 [1.2; 1.6]	3.41e-06	2203	+++?+++-	0.9904	0.000195732	missense_AlphaMissense_PP.0.001	0.4503	0.0956	1.6 [1.3; 1.9]	9.59e-06	982	+++?+-++	0.5901	0.075831
ENSG00000259030	FPGT-TNNI3K	1	74203250	4.84e-05	missense_any_PP.0.001	0.2614	0.0551	1.3 [1.2; 1.4]	3.85e-06	4069	+++++-++	0.5015	3.67e-05	missense_any_PP.0.001	0.2614	0.0551	1.3 [1.2; 1.4]	3.85e-06	4069	+++++-++	0.5015	0.0302875	PTVnoflag.0.01	0.1303	0.0527	1.1 [1; 1.3]	0.0127786	4811	+++++-++	0.9019	2.51e-05	missense_any_PP.0.001	0.2614	0.0551	1.3 [1.2; 1.4]	3.85e-06	4069	+++++-++	0.5015	0.000259676	PTVnoflag_missense_any_PP.0.01	0.1675	0.0374	1.2 [1.1; 1.3]	1.66e-05	7202	+++++-+-	0.7018	0.0421012
ENSG00000125651	GTF2F1	19	6.38056e+06	5.4e-05	PTV_missense_any_PP.0.01	-0.1396	0.0301	0.9 [0.8; 0.9]	1.79e-06	14433	-----++-	0.2725	0.0510202	PTV_missense_PAI3D_PP.0.001	-0.2285	0.0771	0.8 [0.7; 0.9]	0.00256641	2258	----+---	0.4372	0.000128901	PTV.0.01	-0.1403	0.0343	0.9 [0.8; 0.9]	2.15e-05	10777	-----+++	0.4403	0.0423653	missense_PAI3D_PP.0.001	-0.2337	0.1029	0.8 [0.6; 1]	0.0192759	1307	---?+---	0.4593	0.00032893	PTV_missense_PAI3D_PP.0.01	-0.1824	0.0427	0.8 [0.8; 0.9]	9.19e-06	5524	-------+	0.771	0.0133756
ENSG00000116786	PLEKHM2	1	1.56952e+07	5.51e-05	PTV_missense_3_PP.0.001	0.6912	0.1452	2 [1.5; 2.7]	2.96e-06	487	+++-+-??	0.1021	7.32e-05	PTV_missense_3_PP.0.001	0.6912	0.1452	2 [1.5; 2.7]	2.96e-06	487	+++-+-??	0.1021	6.15e-05	PTV.0.001	0.7264	0.1672	2.1 [1.5; 2.9]	2.65e-05	346	+-+???	0.1416	0.0789693	missense_3_PP.0.001	0.7298	0.3029	2.1 [1.1; 3.8]	0.0127001	131	++-?-???	0.1615	0.00102003	PTVnoflag_missense_3_PP.0.001	0.7637	0.1872	2.1 [1.5; 3.1]	5.13e-05	226	+++?+?+?	0.4312	0.00608976
ENSG00000010803	SCMH1	1	41028375	7.21e-05	PTV_missense_AlphaMissense_PP.0.01	0.168	0.036	1.2 [1.1; 1.3]	4.83e-06	9364	+++-++++	0.2402	0.5347	PTVnoflag_missense_AlphaMissense_PP.1e-05	0.3605	0.1796	1.4 [1; 2]	0.0523263	450	+++-++?+	0.0738	0.319523	PTVnoflag.1e-05	0.3924	0.3568	1.5 [0.7; 3]	0.2715	89	++--????	0.003549	4.14e-05	missense_AlphaMissense_PP.0.01	0.168	0.0369	1.2 [1.1; 1.3]	7.53e-06	8919	+++?++++	0.9989	0.00315242	PTV_missense_AlphaMissense_PP.0.01	0.1732	0.0478	1.2 [1.1; 1.3]	0.000264471	4163	+++-+-+-	0.3046	0.0403092
ENSG00000181090	EHMT1	9	1.37694e+08	8.9e-05	missense_REVEL_PP.0.001	0.5357	0.1125	1.7 [1.4; 2.1]	4.43e-06	929	+++++-+?	0.2641	0.000107987	missense_REVEL_PP.0.001	0.5357	0.1125	1.7 [1.4; 2.1]	4.43e-06	929	+++++-+?	0.2641	0.634358	PTVnoflag.0.01	0.0482	0.0885	1 [0.9; 1.2]	0.586	1117	-+++????	0.3649	3.19e-05	missense_REVEL_PP.0.001	0.5357	0.1125	1.7 [1.4; 2.1]	4.43e-06	929	+++++-+?	0.2641	0.0121446	PTV_missense_any_PP.1e-05	0.5906	0.1582	1.8 [1.3; 2.5]	0.0008698	337	+++++++-	0.2212	0.00174555
ENSG00000197616	MYH6	14	23382375	9.36e-05	PTV_missense_AlphaMissense_PP.1e-05	0.3511	0.0684	1.4 [1.2; 1.6]	1.85e-06	2416	+++-++++	0.2201	6.27e-05	PTV_missense_AlphaMissense_PP.1e-05	0.3511	0.0684	1.4 [1.2; 1.6]	1.85e-06	2416	+++-++++	0.2201	0.00740038	PTV.0.001	0.3142	0.0947	1.4 [1.1; 1.6]	0.00279449	1390	++++++++	0.6171	0.000711138	missense_AlphaMissense_PP.1e-05	0.3424	0.0793	1.4 [1.2; 1.6]	6.9e-05	1877	+++?++++	0.4678	0.00025254	PTV_missense_popEVE_PP.0.001	0.5299	0.1165	1.7 [1.4; 2.1]	2.19e-05	637	++++++++	0.7778	0.222149
ENSG00000183765	CHEK2	22	28688875	0.000102755	PTV_missense_REVEL_PP.0.01	0.176	0.0359	1.2 [1.1; 1.3]	1.89921e-06	8959	'+++++++-	0.1873	0.0128916	missense_REVEL_PP.0.001	0.2347	0.0695	1.3 [1.1; 1.4]	0.000921453	2275	++++-+++	0.2976	0.00950907	PTV.0.01	0.1457	0.047	1.2 [1.1; 1.3]	0.00301479	5423	+++++++-	0.1672	0.00197703	missense_REVEL_PP.0.01	0.2212	0.057	1.2 [1.1; 1.4]	0.000162448	3550	+++++++-	0.5142	0.000413056	PTV_missense_any_PP.0.01	0.1661	0.0378	1.2 [1.1; 1.3]	9.19701e-06	6375	+++++++-	0.154	0.0566121
ENSG00000106785	TRIM14	9	98087600	0.000124379	PTVnoflag_missense_popEVE_PP.0.001	-1.3679	0.3253	0.3 [0.1; 0.5]	2.97126e-05	176	'----+???	0.2085	0.000163376	PTVnoflag_missense_popEVE_PP.0.001	-1.3679	0.3253	0.3 [0.1; 0.5]	2.97126e-05	176	----+???	0.2085	5.01668e-05	PTVnoflag.0.001	-1.3679	0.3253	0.3 [0.1; 0.5]	2.97126e-05	176	----+???	0.2085	0.378116	missense_PAI3D_PP.0.001	-0.3172	0.2669	0.7 [0.4; 1.2]	0.2346	161	--??-???	0.7531	0.000568544	PTVnoflag_missense_popEVE_PP.0.001	-1.7013	0.4247	0.2 [0.1; 0.4]	0.000125124	67	--?-??-?	0.8757	0.113888
ENSG00000138622	HCN4	15	73322500	0.00012844	PTV_missense_REVEL_PP.0.001	0.3137	0.0725	1.4 [1.2; 1.6]	9.96318e-06	2246	'++++-+-+	0.4221	0.000155749	PTV_missense_REVEL_PP.0.001	0.3137	0.0725	1.4 [1.2; 1.6]	9.96318e-06	2246	++++-+-+	0.4221	0.0935107	PTV.1e-05	0.6444	0.2972	1.9 [1.1; 3.4]	0.049458	120	+-+?-???	0.5292	0.000107918	missense_REVEL_PP.0.001	0.3461	0.0829	1.4 [1.2; 1.7]	1.63462e-05	1722	++++-+-+	0.1073	0.00594416	missense_any_PP.0.01	0.299	0.0918	1.3 [1.1; 1.6]	0.000645414	1224	+++++--+	0.0964	0.00130451
ENSG00000078114	NEBL	10	20797250	0.000138474	PTV_missense_REVEL_PP.0.01	0.1746	0.0399	1.2 [1.1; 1.3]	1.35978e-05	7389	'+++++++-	0.3722	0.0552977	PTV_missense_any_PP.0.001	0.1595	0.0562	1.2 [1.1; 1.3]	0.00498955	3970	++-+++++	0.7681	0.000108213	PTV.0.01	0.1683	0.0408	1.2 [1.1; 1.3]	3.10661e-05	7160	+++++++-	0.4008	0.0759175	missense_any_PP.0.001	0.2715	0.1079	1.3 [1.1; 1.6]	0.0139761	1100	+++++-++	0.6241	0.0864415	PTV_missense_REVEL_PP.0.01	0.1231	0.0528	1.1 [1; 1.3]	0.0202272	3373	+++++-+-	0.534	0.000456282
ENSG00000126822	PLEKGH3	14	6.47286e+07	0.000161441	missense_AlphaMissense_PP.0.001	0.3573	0.0778	1.4 [1.2; 1.7]	1.21034e-05	1813	'+++?+++-	0.8114	0.000214932	missense_AlphaMissense_PP.0.001	0.3573	0.0778	1.4 [1.2; 1.7]	1.21034e-05	1813	+++?+++-	0.8114	0.324808	PTVnoflag.0.001	0.1973	0.1727	1.2 [0.9; 1.7]	0.2531	452	+-+++???	0.7818	7.68558e-05	missense_AlphaMissense_PP.0.001	0.3573	0.0778	1.4 [1.2; 1.7]	1.21034e-05	1813	+++?+++-	0.8114	0.00247524	missense_AlphaMissense_PP.0.001	0.4095	0.1044	1.5 [1.2; 1.8]	0.000211327	821	+++?+++-	0.8258	0.033386
ENSG00000139209	SLC38A4	12	46768750	0.000175909	PTV_missense_popEVE_PP.0.001	1.041	0.3109	2.8 [1.5; 5.2]	4.60453e-05	133	'+-++????	0.003039	0.000234644	PTV_missense_popEVE_PP.0.001	1.041	0.3109	2.8 [1.5; 5.2]	4.60453e-05	133	+-++????	0.003039	6.90689e-05	PTV.0.001	1.041	0.3109	2.8 [1.5; 5.2]	4.60453e-05	133	+-++????	0.003039	0.276344	missense_AlphaMissense_PP.0.01	0.277	0.175	1.3 [0.9; 1.9]	0.1134	466	+-+?+-??	0.2143	0.00258324	PTV_missense_popEVE_PP.0.001	1.0718	0.4147	2.9 [1.3; 6.6]	0.000976272	78	+-++????	0.03914	0.0354343
ENSG00000160959	LRRC14	8	144520000	0.000177213	PTV_missense_AlphaMissense_PP.0.001	0.5832	0.131	1.8 [1.4; 2.3]	1.59938e-05	620	'+++?+???	0.822	0.000231868	PTV_missense_AlphaMissense_PP.0.001	0.5832	0.131	1.8 [1.4; 2.3]	1.59938e-05	620	+++?+???	0.822	0.0065653	PTV.0.001	0.8336	0.2663	2.3 [1.4; 3.9]	0.00616062	126	+-+?+???	0.3282	0.000402818	missense_AlphaMissense_PP.0.001	0.5648	0.1502	1.8 [1.3; 2.4]	0.000179957	504	+++?-???	0.4358	0.423021	PTV_missense_PAI3D_PP.1e-05	1.0125	0.4129	2.8 [1.2; 6.2]	0.0264059	34	+-??????	0.07408	4.12851e-06
ENSG00000008710	PKD1	16	2089780	0.000184246	PTVnoflag_missense_popEVE_PP.1e-05	0.7689	0.1637	2.2 [1.6; 3]	2.03063e-05	408	'+-+++???	0.04964	0.000122802	PTVnoflag_missense_popEVE_PP.1e-05	0.7689	0.1637	2.2 [1.6; 3]	2.03063e-05	408	+-+++???	0.04964	7.97936e-05	PTVnoflag.1e-05	0.7689	0.1637	2.2 [1.6; 3]	2.03063e-05	408	+-+++???	0.04964	0.70253	missense_REVEL_PP.0.001	0.1083	0.0552	1.1 [1; 1.2]	0.0575319	4120	+-++--++	0.1499	0.000269932	PTVnoflag_missense_popEVE_PP.1e-05	0.9538	0.2111	2.6 [1.7; 3.9]	3.46336e-05	179	++-+++??	0.07633	0.144733
ENSG00000197562	RAB40C	16	597092	0.000192905	PTV_missense_PAI3D_PP.0.001	0.8709	0.1887	2.4 [1.7; 3.5]	1.0409e-05	281	'+++?+???	0.6121	0.000246577	PTV_missense_PAI3D_PP.0.001	0.8709	0.1887	2.4 [1.7; 3.5]	1.0409e-05	281	+++?+???	0.6121	0.0070394	PTV.1e-05	1.6073	0.5806	5 [1.6; 15.6]	0.00258568	26	+?+?????	0.06941	0.000242545	missense_PAI3D_PP.0.001	0.933	0.221	2.5 [1.6; 3.9]	4.05948e-05	207	++??+???	0.5263	0.00134717	PTV_missense_PAI3D_PP.0.001	1.0059	0.2702	2.7 [1.6; 4.6]	0.000231998	98	++??????	0.5582	0.384854
ENSG00000117475	BLZF1	1	1.69373e+08	0.000210769	PTV_missense_3_PP.0.001	-0.6215	0.1774	0.5 [0.4; 0.8]	5.03468e-05	476	'---+-?-?	0.09361	0.00023029	PTV_missense_3_PP.0.001	-0.6215	0.1774	0.5 [0.4; 0.8]	5.03468e-05	476	---+-?-?	0.09361	0.000104664	PTV.0.001	-0.6182	0.1778	0.5 [0.4; 0.8]	5.55294e-05	473	---+-?-?	0.09048	0.372267	missense_PAI3D_PP.0.001	-0.1661	0.1214	0.8 [0.7; 1.1]	0.1714	888	--??-++-	0.9834	0.0300322	PTV_missense_REVEL_PP.0.001	-0.4914	0.2143	0.6 [0.4; 0.9]	0.0140328	230	+--?-?-?	0.1614	0.0015431
ENSG00000204371	EHMT2	6	3.18812e+07	0.000224393	PTV_missense_REVEL_PP.0.001	0.5682	0.125	1.8 [1.4; 2.3]	1.03419e-05	657	'++?+-++?	0.268	0.00025237	PTV_missense_REVEL_PP.0.001	0.5682	0.125	1.8 [1.4; 2.3]	1.03419e-05	657	++?+-++?	0.268	0.000515223	PTV.0.001	0.7803	0.2044	2.2 [1.5; 3.3]	0.00033261	236	++?+-???	0.2271	0.016241	missense_REVEL_PP.0.001	0.4616	0.1595	1.6 [1.2; 2.2]	0.00478742	415	++?+-+-?	0.5852	1.72871e-05	PTV.0.001	1.2436	0.2619	3.5 [2.1; 5.8]	3.25644e-06	104	++?++???	0.6745	0.180317
ENSG00000102178__females	UBL4A	23	154485500	0.000232775	PTV_missense_PAI3D_PP.0.001	1.2213	0.2978	3.4 [1.9; 6.1]	5.15398e-05	68	'-??+????	0.1842	0.000232775	PTV_missense_PAI3D_PP.0.001	1.2213	0.2978	3.4 [1.9; 6.1]	5.15398e-05	68	-??+????	0.1842	NA	NA	NA	NA	NA	NA	NA	NA	NA	0.4659	missense_any_PP.0.001	-0.5579	0.7447	0.6 [0.1; 2.5]	0.4538	41	-?-?????	0.4907	NA	NA	NA	NA	NA	NA	NA	NA	NA	NA
ENSG00000118194	TNNT2	1	201360000	0.000240348	PTVnoflag_missense_any_PP.0.001	0.2675	0.0616	1.3 [1.2; 1.5]	1.57808e-05	3060	'++++++-+	0.4941	0.000320295	PTVnoflag_missense_any_PP.0.001	0.2675	0.0616	1.3 [1.2; 1.5]	1.57808e-05	3060	++++++-+	0.4941	0.215532	PTVnoflag.0.001	0.2199	0.1628	1.2 [0.9; 1.7]	0.1769	466	+-++-???	0.3302	0.000209365	missense_any_PP.0.001	0.2844	0.0679	1.3 [1.2; 1.5]	3.14352e-05	2571	++++++++	0.6176	0.00929613	PTVnoflag_missense_any_PP.0.001	0.2727	0.0828	1.3 [1.1; 1.5]	0.000824936	1368	++++++++	0.9468	0.0688984
ENSG00000163754	GYG1	3	148992500	0.000240397	PTV_missense_PAI3D_PP.0.01	-0.1924	0.0443	0.8 [0.8; 0.9]	5.89192e-06	7008	'---+----	0.05802	0.0173931	PTV_missense_PAI3D_PP.0.001	-0.1798	0.0596	0.8 [0.7; 0.9]	0.000986393	3737	---+----	0.0387	0.0261676	PTV.0.001	-0.2206	0.0942	0.8 [0.7; 1]	0.0141748	1419	---+----	0.3189	0.00171523	missense_PAI3D_PP.0.01	-0.1729	0.0492	0.8 [0.8; 0.9]	0.0001784	5597	--??----	0.05735	0.000497442	PTV_missense_PAI3D_PP.0.01	-0.2469	0.0576	0.8 [0.7; 0.9]	1.78205e-05	3261	--------	0.8305	0.665422
ENSG00000149930	TAOK2	16	29978000	0.000244262	PTV_missense_any_PP.0.001	0.3651	0.0752	1.4 [1.2; 1.7]	5.21668e-06	2033	'+++-+---	0.1547	0.000170004	PTV_missense_any_PP.0.001	0.3651	0.0752	1.4 [1.2; 1.7]	5.21668e-06	2033	+++-+---	0.1547	0.0189942	PTVnoflag.0.001	0.4377	0.1639	1.5 [1.1; 2.1]	0.0146974	395	+++-+???	0.2994	0.00104056	missense_any_PP.0.001	0.3585	0.0851	1.4 [1.2; 1.7]	8.54446e-05	1623	+++++---	0.2566	0.0053656	PTV_missense_any_PP.0.001	0.3737	0.1008	1.5 [1.2; 1.8]	0.000305485	909	+++-+---	0.6653	0.0710563
ENSG00000170807	LMOD2	7	123656000	0.00027549	PTV_missense_PAI3D_PP.0.001	0.5849	0.119	1.8 [1.4; 2.3]	5.84042e-06	702	'++++++??	0.1172	0.000193265	PTV_missense_PAI3D_PP.0.001	0.5849	0.119	1.8 [1.4; 2.3]	5.84042e-06	702	++++++??	0.1172	0.00130665	PTV.0.001	0.5487	0.1564	1.7 [1.3; 2.4]	0.000869676	392	++-+++??	0.5957	0.0173307	missense_PAI3D_PP.0.001	0.6494	0.1835	1.9 [1.3; 2.7]	0.00188917	306	+-+?+???	0.01464	0.000378382	PTV_missense_PAI3D_PP.0.001	0.7071	0.1509	2 [1.5; 2.7]	9.39654e-06	336	+++-+++-	0.06726	0.349462
ENSG00000124479__males	NDP	23	43949800	0.000280293	PTV_missense_AlphaMissense_PP.0.001	1.8151	0.5193	6.1 [2.2; 17]	0.000241167	32	'++??????	0.07701	0.00028553	PTV_missense_AlphaMissense_PP.0.001	1.8151	0.5193	6.1 [2.2; 17]	0.000241167	32	++??????	0.07701	NA	NA	NA	NA	NA	NA	NA	NA	NA	0.000280293	missense_AlphaMissense_PP.0.001	1.8151	0.5193	6.1 [2.2; 17]	0.000241167	32	++??????	0.07701	NA	NA	NA	NA	NA	NA	NA	NA	NA	NA
ENSG00000106617	PRKAG2	7	1.51558e+08	0.000310912	missense_3_PP.1e-05	1.3757	0.323	4 [2.1; 7.5]	2.29189e-05	82	'+++?????	0.1323	0.000211685	missense_3_PP.1e-05	1.3757	0.323	4 [2.1; 7.5]	2.29189e-05	82	+++?????	0.1323	0.303273	PTVnoflag.1e-05	0.5525	0.393	1.7 [0.8; 3.8]	0.1598	70	+--?????	0.05956	0.000130928	missense_3_PP.1e-05	1.3757	0.323	4 [2.1; 7.5]	2.29189e-05	82	+++?????	0.1323	0.0114721	PTVnoflag_missense_PAI3D_PP.1e-05	1.0459	0.3156	2.8 [1.5; 5.3]	0.000690213	76	+++?????	0.2592	0.00349256
ENSG00000179873	NLRP11	19	55788000	0.000366032	missense_AlphaMissense_PP.0.001	0.6476	0.1517	1.9 [1.4; 2.6]	8.19249e-05	519	'+-??++??	0.3416	0.000487173	missense_AlphaMissense_PP.0.001	0.6476	0.1517	1.9 [1.4; 2.6]	8.19249e-05	519	+-??++??	0.3416	0.444679	PTVnoflag.1e-05	-1.0554	0.6707	0.3 [0.1; 1.3]	0.1156	26	--??????	0.8755	0.000122726	missense_AlphaMissense_PP.0.001	0.6476	0.1517	1.9 [1.4; 2.6]	8.19249e-05	519	+-??++??	0.3416	0.00483832	missense_AlphaMissense_PP.0.001	0.7333	0.2031	2.1 [1.4; 3.1]	0.00106871	222	+-??+++?	0.3604	0.067846
ENSG00000129170	CSRP3	11	19183000	0.000388884	PTV_missense_any_PP.0.01	0.1541	0.0351	1.2 [1.1; 1.2]	2.61292e-05	9805	'++++++++	0.2576	0.000698372	PTV_missense_REVEL_PP.0.001	0.398	0.0912	1.5 [1.2; 1.8]	2.70433e-05	1387	+++++-++	0.4076	0.0201936	PTV.0.001	0.4975	0.184	1.6 [1.1; 2.4]	0.0146426	324	+++--???	0.005219	0.00116923	missense_any_PP.0.01	0.1427	0.0356	1.2 [1.1; 1.2]	0.000154994	9475	+-++++++	0.03474	0.0468155	PTV_missense_REVEL_PP.0.001	0.3634	0.1204	1.4 [1.1; 1.8]	0.00532293	635	++++--++	0.2389	0.00433897
ENSG00000149735	GPHA2	11	6.49348e+07	0.000397868	PTVnoflag_missense_REVEL_PP.0.001	-0.4914	0.1332	0.6 [0.5; 0.8]	0.000120621	939	'-+----??	0.4045	0.000530455	PTVnoflag_missense_REVEL_PP.0.001	-0.4914	0.1332	0.6 [0.5; 0.8]	0.000120621	939	-+----??	0.4045	0.00019975	PTVnoflag.0.001	-0.4907	0.1333	0.6 [0.5; 0.8]	0.000123253	938	-+----??	0.4053	0.101144	missense_AlphaMissense_PP.0.01	0.254	0.1343	1.3 [1; 1.7]	0.05868	687	++-?-++?	0.7557	0.00734436	PTV_missense_REVEL_PP.0.001	-0.4614	0.1769	0.6 [0.4; 0.9]	0.00269188	440	-+----+?	0.3563	0.0377312
ENSG00000109819	PPARGC1A	4	2.37958e+07	0.00041938	PTV_missense_popEVE_PP.1e-05	1.2552	0.3148	3.5 [1.9; 6.5]	0.000136175	75	'++-?????	0.2414	0.000389487	PTV_missense_popEVE_PP.1e-05	1.2552	0.3148	3.5 [1.9; 6.5]	0.000136175	75	++-?????	0.2414	0.00016965	PTV.1e-05	1.2552	0.3148	3.5 [1.9; 6.5]	0.000136175	75	++-?????	0.2414	0.417292	missense_PAI3D_PP.0.001	0.2136	0.1212	1.2 [1; 1.6]	0.0781	898	+-+?-+++	0.06294	0.00262785	PTV_missense_popEVE_PP.0.001	1.5558	0.4553	4.7 [1.9; 11.6]	0.000974908	30	+?+?????	0.9288	0.0113841
ENSG00000146281	PM20D2	6	8.91463e+07	0.000440759	PTV_missense_popEVE_PP.0.001	-0.797	0.218	0.5 [0.3; 0.7]	0.000141966	364	'-------?	0.546	0.000491986	PTV_missense_popEVE_PP.0.001	-0.797	0.218	0.5 [0.3; 0.7]	0.000141966	364	-------?	0.546	0.000176131	PTV.0.001	-0.797	0.218	0.5 [0.3; 0.7]	0.000141966	364	-------?	0.546	0.368087	missense_PAI3D_PP.0.01	0.234	0.1132	1.3 [1; 1.6]	0.0838943	971	+-+?--+-	0.0672	0.017711	PTV_missense_PAI3D_PP.1e-05	-0.6449	0.2455	0.5 [0.3; 0.8]	0.00608314	202	------+?	0.4546	0.0356095
ENSG00000274180	NATD1	17	21243550	0.00044467	missense_PAI3D_PP.0.001	0.6317	0.1615	1.9 [1.4; 2.6]	0.000115799	462	'+++?+???	0.4676	0.000563007	missense_PAI3D_PP.0.001	0.6317	0.1615	1.9 [1.4; 2.6]	0.000115799	462	+++?+???	0.4676	0.3566	PTV.0.001	0.419	0.4545	1.5 [0.6; 3.7]	0.3566	62	+?+?????	0.1515	0.000232405	missense_PAI3D_PP.0.001	0.6317	0.1615	1.9 [1.4; 2.6]	0.000115799	462	+++?+???	0.4676	0.0365859	missense_PAI3D_PP.0.001	0.564	0.2247	1.8 [1.1; 2.7]	0.0128462	201	+++?+???	0.9306	0.000731662
ENSG00000107779	BMPR1A	10	86883000	0.000456942	missense_3_PP.1e-05	1.1757	0.2772	3.2 [1.9; 5.6]	2.72691e-05	128	'+???+???	0.3745	0.000304635	missense_3_PP.1e-05	1.1757	0.2772	3.2 [1.9; 5.6]	2.72691e-05	128	+???+???	0.3745	NA	NA	NA	NA	NA	NA	NA	NA	NA	0.000335732	missense_3_PP.1e-05	1.1757	0.2772	3.2 [1.9; 5.6]	2.72691e-05	128	+???+???	0.3745	0.526422	PTV_missense_PAI3D_PP.0.01	-0.1045	0.0905	0.9 [0.8; 1.1]	0.248	1265	+-??--+-	0.06324	0.000377614
ENSG00000116525	TRIM62	1	3.31473e+07	0.000481396	missense_AlphaMissense_PP.0.001	0.3257	0.079	1.4 [1.2; 1.6]	4.31371e-05	1911	'++-?+++-	0.3472	0.00064242	missense_AlphaMissense_PP.0.001	0.3257	0.079	1.4 [1.2; 1.6]	4.31371e-05	1911	++-?+++-	0.3472	0.632743	PTV.0.001	0.0758	0.1518	1.1 [0.8; 1.5]	0.6173	658	+++--+++	0.9559	0.000193744	missense_AlphaMissense_PP.0.001	0.3257	0.079	1.4 [1.2; 1.6]	4.31371e-05	1911	++-?+++-	0.3472	8.541e-05	missense_AlphaMissense_PP.0.001	0.4653	0.1026	1.6 [1.3; 1.9]	9.37537e-06	858	+++?+++-	0.6058	0.259338
ENSG00000263155	MYZAP	15	57592000	0.000497564	PTVnoflag_missense_3_PP.0.001	0.5079	0.141	1.7 [1.3; 2.2]	0.000313855	562	'++++++??	0.3355	0.000638065	PTVnoflag_missense_3_PP.0.001	0.5079	0.141	1.7 [1.3; 2.2]	0.000313855	562	++++++??	0.3355	0.000497564	PTVnoflag.0.001	0.5079	0.141	1.7 [1.3; 2.2]	0.000313855	562	++++++??	0.3355	NA	NA	NA	NA	NA	NA	NA	NA	NA	0.0373279	PTV_missense_3_PP.0.01	0.3706	0.1832	1.4 [1; 2.1]	0.0213632	277	++++-+-+	0.08844	0.00761391
ENSG00000160049	DFFA	1	1.04619e+07	0.000545443	PTV_missense_popEVE_PP.0.001	0.4763	0.1241	1.6 [1.3; 2.1]	0.000164871	724	'++++++??	0.2319	0.000727737	PTV_missense_popEVE_PP.0.001	0.4763	0.1241	1.6 [1.3; 2.1]	0.000164871	724	++++++??	0.2319	0.000247436	PTV.0.001	0.4763	0.1241	1.6 [1.3; 2.1]	0.000164871	724	++++++??	0.2319	0.436265	missense_PAI3D_PP.0.001	-0.8596	0.7178	0.4 [0.1; 1.7]	0.2311	28	+-??????	0.2307	0.000789078	PTV_missense_popEVE_PP.0.001	0.6151	0.1629	1.8 [1.3; 2.5]	0.000218099	331	++++++??	0.4397	0.441707
ENSG00000197860	SGTB	5	6.56713e+07	0.000605167	PTV_missense_popEVE_PP.0.001	1.6772	0.4179	5.4 [2.4; 12.1]	0.000180706	44	'+++?????	0.2199	0.000806108	PTV_missense_popEVE_PP.0.001	1.6772	0.4179	5.4 [2.4; 12.1]	0.000180706	44	+++?????	0.2199	0.000270941	PTV.0.001	1.6772	0.4179	5.4 [2.4; 12.1]	0.000180706	44	+++?????	0.2199	0.0699082	missense_any_PP.0.001	0.3498	0.1527	1.4 [1.1; 1.9]	0.029818	549	+-++++??	0.8951	0.0219568	PTV_missense_PAI3D_PP.0.001	1.2177	0.4214	3.4 [1.5; 7.7]	0.00620759	47	+++?????	0.2056	0.102581
ENSG00000169946	ZFPM2	8	105339000	0.00066811	PTV_missense_popEVE_PP.1e-05	1.3969	0.347	4 [2; 8]	0.000205202	89	'+++++???	0.7123	0.000605256	PTV_missense_popEVE_PP.1e-05	1.3969	0.347	4 [2; 8]	0.000205202	89	+++++???	0.7123	0.000273443	PTV.1e-05	1.3969	0.347	4 [2; 8]	0.000205202	89	+++++???	0.7123	0.273124	missense_PAI3D_PP.1e-05	0.2657	0.1356	1.3 [1; 1.7]	0.05014	626	++-?-+++	0.5251	0.0409454	PTV_missense_popEVE_PP.1e-05	1.526	0.6275	4.6 [1.3; 15.7]	0.0136543	25	++??????	0.6325	0.0463781
ENSG00000154642	C21orf91	21	17793440	0.000670227	PTV_missense_PAI3D_PP.1e-05	0.8677	0.2184	2.4 [1.6; 3.7]	8.67534e-05	202	'+++?++??	0.9361	0.00044927	PTV_missense_PAI3D_PP.1e-05	0.8677	0.2184	2.4 [1.6; 3.7]	8.67534e-05	202	+++?++??	0.9361	0.000329112	PTV.1e-05	1.1285	0.2912	3.1 [1.7; 5.5]	8.77547e-05	98	++-?????	0.1846	0.131415	missense_any_PP.0.001	0.1424	0.076	1.2 [1; 1.3]	0.06083	2112	++-?+++-	0.5948	8.22268e-05	PTV_missense_popEVE_PP.1e-05	1.6939	0.3781	5.4 [2.6; 11.4]	9.08923e-06	48	++??????	0.2161	0.0838193
ENSG00000168769	TET2	4	105234125	0.000677435	PTVnoflag_missense_any_PP.0.001	0.1952	0.0456	1.2 [1.1; 1.3]	4.87378e-05	4141	'+++-+-+-	0.1119	0.000859178	PTVnoflag_missense_any_PP.0.001	0.1952	0.0456	1.2 [1.1; 1.3]	4.87378e-05	4141	+++-+-+-	0.1119	0.00123439	PTVnoflag.0.001	0.2893	0.0771	1.3 [1.1; 1.6]	0.000545561	1210	+++-+++-	0.5061	0.0904825	missense_any_PP.0.001	0.1369	0.0558	1.1 [1; 1.3]	0.0249135	2978	+++++-+-	0.1027	0.00184474	PTV_missense_AlphaMissense_PP.0.001	0.2021	0.0473	1.2 [1.1; 1.3]	0.000159241	3103	+-+-+-++	0.2862	0.135248
ENSG00000180914	OXTR	3	8.75303e+06	0.000743789	missense_any_PP.1e-05	0.7954	0.193	2.2 [1.5; 3.2]	1.84085e-05	326	'+++++-??	0.04062	0.000500023	missense_any_PP.1e-05	0.7954	0.193	2.2 [1.5; 3.2]	1.84085e-05	326	+++++-??	0.04062	0.859078	PTV.1e-05	-0.2118	0.4085	0.8 [0.4; 1.8]	0.6041	102	-+-?-???	0.6424	0.000255341	missense_any_PP.1e-05	0.7954	0.193	2.2 [1.5; 3.2]	1.84085e-05	326	+++++-??	0.04062	0.00573507	missense_any_PP.1e-05	0.8825	0.2463	2.4 [1.5; 3.9]	0.000280901	161	+++?+--?	0.07299	0.572847
ENSG00000177732	SOX12	20	326388	0.000859315	PTVnoflag_missense_PAI3D_PP.0.001	1.6328	0.4066	5.1 [2.3; 11.4]	8.95627e-05	51	'++??????	0.1437	0.000845056	PTVnoflag_missense_PAI3D_PP.0.001	1.6328	0.4066	5.1 [2.3; 11.4]	8.95627e-05	51	++??????	0.1437	0.3257	PTV.0.001	-0.6918	0.7039	0.5 [0.1; 2]	0.3257	32	-?-?????	0.4405	0.000433141	missense_PAI3D_PP.0.001	1.6328	0.4066	5.1 [2.3; 11.4]	8.95627e-05	51	++??????	0.1437	0.0565507	PTVnoflag_missense_PAI3D_PP.0.001	1.7445	0.7459	5.7 [1.3; 24.7]	0.0108834	23	++??????	0.6572	0.107046
ENSG00000198265	HELZ	17	6.71024e+07	0.000863915	PTVnoflag_missense_PAI3D_PP.0.001	0.3437	0.086	1.4 [1.2; 1.7]	6.40173e-05	1569	'+++?-+++	0.1425	0.000793591	PTVnoflag_missense_PAI3D_PP.0.001	0.3437	0.086	1.4 [1.2; 1.7]	6.40173e-05	1569	+++?-+++	0.1425	0.00865287	PTV.1e-05	1.1894	0.394	3.3 [1.5; 7.1]	0.00302604	66	+++?????	0.3958	0.00534757	missense_PAI3D_PP.0.001	0.2913	0.0905	1.3 [1.1; 1.6]	0.00105702	1486	+++?-+++	0.2007	0.036524	PTV_missense_PAI3D_PP.1e-05	0.5125	0.1636	1.7 [1.2; 2.3]	0.00222211	324	+++?-+++	0.2602	0.0206541
ENSG00000164532	TBX20	7	3.52089e+07	0.000887382	PTVnoflag_missense_PAI3D_PP.0.001	0.3524	0.0884	1.4 [1.2; 1.7]	5.50891e-05	1562	'+++?+++-	0.12	0.00117043	PTVnoflag_missense_PAI3D_PP.0.001	0.3524	0.0884	1.4 [1.2; 1.7]	5.50891e-05	1562	+++?+++-	0.12	0.0665544	PTVnoflag.0.001	1.176	0.5668	3.2 [1.1; 9.8]	0.0590558	31	-?+?????	0.1386	0.00306457	missense_PAI3D_PP.0.001	0.3039	0.0897	1.4 [1.1; 1.6]	0.000666724	1516	++-?+++-	0.2612	0.00143833	PTVnoflag_missense_AlphaMissense_PP.0.001	0.403	0.1128	1.5 [1.2; 1.9]	0.000199688	750	+++?--+-	0.003895	0.266885
ENSG00000125652	ALKBH7	19	6372840	0.000887424	PTV_missense_popEVE_PP.0.001	-0.6342	0.1915	0.5 [0.4; 0.8]	0.000253694	443	'-----???	0.3998	0.00118211	PTV_missense_popEVE_PP.0.001	-0.6342	0.1915	0.5 [0.4; 0.8]	0.000253694	443	-----???	0.3998	0.000380298	PTV.0.001	-0.6342	0.1915	0.5 [0.4; 0.8]	0.000253694	443	-----???	0.3998	0.559165	missense_any_PP.1e-05	-0.2067	0.2425	0.8 [0.5; 1.3]	0.3941	206	-+-?--??	0.5388	0.0309334	PTV_missense_popEVE_PP.0.001	-0.568	0.2573	0.6 [0.3; 0.9]	0.012805	206	-----???	0.6436	0.0221223
ENSG00000132128	LRRC41	1	4.62797e+07	0.00089651	PTV.0.001	1.1944	0.3049	3.3 [1.8; 6]	0.000236447	84	'+++?????	0.9362	0.00108992	PTV.0.001	1.1944	0.3049	3.3 [1.8; 6]	0.000236447	84	+++?????	0.9362	0.000318009	PTV.0.001	1.1944	0.3049	3.3 [1.8; 6]	0.000236447	84	+++?????	0.9362	0.523122	missense_AlphaMissense_PP.1e-05	-0.1795	0.1935	0.8 [0.6; 1.2]	0.3536	365	++-?-???	0.09177	0.0143684	PTV.0.001	1.387	0.4886	4 [1.5; 10.4]	0.00508151	30	+?+?????	0.1723	0.0452721
ENSG00000143569	UBA2PL	1	154234000	0.000930465	missense_PAI3D_PP.0.001	0.6669	0.1854	1.9 [1.4; 2.8]	0.000198315	330	'+++?+?+?	0.1887	0.00123885	missense_PAI3D_PP.0.001	0.6669	0.1854	1.9 [1.4; 2.8]	0.000198315	330	+++?+?+?	0.1887	NA	NA	NA	NA	NA	NA	NA	NA	NA	0.000639035	missense_PAI3D_PP.0.001	0.6669	0.1854	1.9 [1.4; 2.8]	0.000198315	330	+++?+?+?	0.1887	0.0107221	missense_PAI3D_PP.0.001	0.7271	0.244	2.1 [1.3; 3.3]	0.00243513	156	+++?+?+?	0.8793	0.04128
ENSG00000096968	JAK2	9	5031425	0.000943022	PTV_missense_any_PP.0.001	0.2068	0.0512	1.2 [1.1; 1.4]	0.000105663	4196	'+++++-++	0.786	0.00120173	PTV_missense_any_PP.0.001	0.2068	0.0512	1.2 [1.1; 1.4]	0.000105663	4196	+++++-++	0.786	0.0569234	PTV.0.001	0.4604	0.2159	1.6 [1; 2.4]	0.043879	294	+-+++???	0.606	0.00105626	missense_any_PP.0.001	0.1983	0.0529	1.2 [1.1; 1.4]	0.000286416	3899	++++++++	0.7399	0.000909728	PTV_missense_any_PP.0.001	0.2743	0.0665	1.3 [1.2; 1.5]	7.9784e-05	1954	++++++++	0.7422	0.0750648
ENSG00000059588	TARBP1	1	2.34391e+08	0.000998115	missense_PAI3D_PP.0.001	-0.5705	0.1448	0.6 [0.4; 0.8]	8.42635e-05	770	'---?----	0.9657	0.00121002	missense_PAI3D_PP.0.001	-0.5705	0.1448	0.6 [0.4; 0.8]	8.42635e-05	770	---?----	0.9657	0.836509	PTV.1e-05	-0.113	0.1345	0.9 [0.7; 1.2]	0.4008	703	+-+---+-	0.2544	0.000333202	missense_PAI3D_PP.0.001	-0.5705	0.1448	0.6 [0.4; 0.8]	8.42635e-05	770	---?----	0.9657	0.00730671	missense_PAI3D_PP.0.001	-0.6572	0.1878	0.5 [0.4; 0.7]	0.00063617	349	---?----	0.9481	0.846111
ENSG00000288705	UGT1A5	2	2.33722e+08	0.00100376	PTVnoflag_missense_popEVE_PP.0.001	-0.7269	0.1986	0.5 [0.3; 0.7]	0.000131352	358	'------??	0.4701	0.0013296	PTVnoflag_missense_popEVE_PP.0.001	-0.7269	0.1986	0.5 [0.3; 0.7]	0.000131352	358	------??	0.4701	0.000392824	PTVnoflag.0.001	-0.7269	0.1986	0.5 [0.3; 0.7]	0.000131352	358	------??	0.4701	0.82514	missense_AlphaMissense_PP.1e-05	0.2221	0.1705	1.2 [0.9; 1.7]	0.1927	375	+--?+++?	0.5198	0.00452003	PTVnoflag_missense_popEVE_PP.0.001	-0.922	0.2746	0.4 [0.2; 0.7]	0.000604804	155	-----???	0.5892	0.748564
ENSG00000183206	POTEC	18	14516960	0.00101836	missense_any_PP.0.01	-0.6816	0.1805	0.5 [0.4; 0.7]	0.000125652	607	'---?-??-	0.7441	0.00417203	missense_any_PP.0.001	-0.6348	0.1846	0.5 [0.4; 0.8]	0.000646822	487	---?-???	0.7682	0.78291	PTVnoflag.0.001	0.2601	0.1851	1.3 [0.9; 1.9]	0.1601	389	+?+-+???	0.7459	0.000338393	missense_any_PP.0.01	-0.6816	0.1805	0.5 [0.4; 0.7]	0.000125652	607	---?-??-	0.7441	0.181172	PTVnoflag_missense_3_PP.0.001	0.4828	0.2203	1.6 [1.1; 2.5]	0.0309181	179	+?+++???	0.6667	0.00635343
ENSG00000198498	TMA16	4	163501250	0.00105505	PTV_missense_PAI3D_PP.0.01	-0.4103	0.1069	0.7 [0.5; 0.8]	4.01511e-05	1071	'----+---	0.3701	0.00191324	PTV_missense_PAI3D_PP.0.001	-0.4076	0.1106	0.7 [0.5; 0.8]	7.24441e-05	1011	----+-+-	0.3451	0.0230248	PTV.0.001	-0.3706	0.1622	0.7 [0.5; 0.9]	0.0135682	436	----+-??	0.6056	0.00427906	missense_PAI3D_PP.0.01	-0.4213	0.14	0.7 [0.5; 0.9]	0.00130352	627	---?----	0.5524	0.00848206	PTV_missense_any_PP.0.01	-0.4024	0.1264	0.7 [0.5; 0.9]	0.00107525	600	--------	0.7952	0.0872574
ENSG00000095637	SORBS1	10	9.53198e+07	0.00105947	PTVnoflag_missense_3_PP.0.001	0.4534	0.1288	1.6 [1.2; 2]	0.000258902	703	'+++++-??	0.1373	0.00138551	PTVnoflag_missense_3_PP.0.001	0.4534	0.1288	1.6 [1.2; 2]	0.000258902	703	+++++-??	0.1373	0.000565846	PTVnoflag.0.001	0.4627	0.1335	1.6 [1.2; 2.1]	0.000340518	654	+++++-??	0.2146	0.866874	missense_3_PP.0.001	0.8852	0.7411	2.4 [0.6; 10.4]	0.2323	27	++??????	0.6744	0.713955	PTVnoflag_missense_popEVE_PP.0.001	0.2592	0.203	1.3 [0.9; 1.9]	0.2017	265	+++?-???	0.5945	0.000812484
ENSG00000119699	TGFB3	14	75961500	0.00106528	PTV_missense_3_PP.1e-05	1.6007	0.371	5 [2.4; 10.3]	2.50441e-05	57	'++??????	0.3262	0.000723337	PTV_missense_3_PP.1e-05	1.6007	0.371	5 [2.4; 10.3]	2.50441e-05	57	++??????	0.3262	0.00302094	PTV.0.001	1.1595	0.3786	3.2 [1.5; 6.7]	0.00302094	61	+?+?????	0.06131	0.190553	missense_3_PP.1e-05	1.2703	0.519	3.6 [1.3; 9.9]	0.0227387	29	++??????	0.1947	0.0183383	PTV_missense_PAI3D_PP.1e-05	1.243	0.3797	3.5 [1.6; 7.3]	0.00137857	48	++???++?	0.6399	0.0358141
ENSG00000145723	GIN1	5	103090000	0.00111103	missense_AlphaMissense_PP.1e-05	0.9103	0.2262	2.5 [1.6; 3.9]	0.000125966	198	'+++?+???	0.5431	0.000744266	missense_AlphaMissense_PP.1e-05	0.9103	0.2262	2.5 [1.6; 3.9]	0.000125966	198	+++?+???	0.5431	0.0407734	PTV.1e-05	-0.6068	0.2757	0.5 [0.3; 0.9]	0.0204921	152	------??	0.8867	0.000376207	missense_AlphaMissense_PP.1e-05	0.9103	0.2262	2.5 [1.6; 3.9]	0.000125966	198	+++?+???	0.5431	0.0298675	missense_AlphaMissense_PP.1e-05	0.97	0.3135	2.6 [1.4; 4.9]	0.00279526	76	+++????-	0.3285	0.00539828
ENSG00000219481	NBPF1	1	16564625	0.00111644	PTV_missense_3_PP.1e-05	0.7501	0.1967	2.1 [1.4; 3.1]	0.000223291	265	'+?+++???	0.9395	0.000669155	PTV_missense_3_PP.1e-05	0.7501	0.1967	2.1 [1.4; 3.1]	0.000223291	265	+?+++???	0.9395	0.00111644	PTV.1e-05	0.7501	0.1967	2.1 [1.4; 3.1]	0.000223291	265	+?+++???	0.9395	NA	NA	NA	NA	NA	NA	NA	NA	NA	0.00353138	PTV_missense_3_PP.1e-05	0.9447	0.2698	2.6 [1.5; 4.4]	0.000696075	94	+?++????	0.9554	0.781615
ENSG00000224586	GPX5	6	28527000	0.0011174	missense_AlphaMissense_PP.1e-05	1.1461	0.2765	3.1 [1.8; 5.4]	8.45414e-05	143	'+++?+???	0.06484	0.000744476	missense_AlphaMissense_PP.1e-05	1.1461	0.2765	3.1 [1.8; 5.4]	8.45414e-05	143	+++?+???	0.06484	0.397204	PTVnoflag.0.001	-0.2831	0.1852	0.8 [0.5; 1.1]	0.1265	379	---+-???	0.7138	0.000380404	missense_AlphaMissense_PP.1e-05	1.1461	0.2765	3.1 [1.8; 5.4]	8.45414e-05	143	+++?+???	0.06484	0.14129	missense_AlphaMissense_PP.1e-05	0.8266	0.3988	2.3 [1; 5]	0.0261558	60	+++?????	0.41	0.663988
ENSG00000130164	LDLR	19	1.10942e+07	0.00113444	PTV_missense_AlphaMissense_PP.0.001	0.2958	0.0706	1.3 [1.2; 1.5]	5.83844e-05	2486	'++++++-+	0.7728	0.00130287	PTV_missense_AlphaMissense_PP.0.001	0.2958	0.0706	1.3 [1.2; 1.5]	5.83844e-05	2486	++++++-+	0.7728	0.0661254	PTV.0.001	0.3128	0.1628	1.4 [1; 1.9]	0.05468	510	++++++-?	0.9162	0.00223787	missense_AlphaMissense_PP.0.001	0.2869	0.0786	1.3 [1.1; 1.6]	0.000414632	1976	+++?+--+	0.7662	0.0649435	missense_PAI3D_PP.0.01	0.4533	0.1737	1.6 [1.1; 2.2]	0.00978875	389	++??-+++	0.1816	0.000678851
ENSG00000135766	EGLN1	1	231369000	0.00113989	PTV_missense_3_PP.1e-05	1.6283	0.3935	5.1 [2.4; 11]	3.45408e-05	50	'++??????	0.517	0.000837729	PTV_missense_3_PP.1e-05	1.6283	0.3935	5.1 [2.4; 11]	3.45408e-05	50	++??????	0.517	0.00665194	PTV.1e-05	1.6254	0.5881	5.1 [1.6; 16.1]	0.00502242	24	++??????	0.5185	0.0692547	missense_PAI3D_PP.1e-05	0.8835	0.3389	2.4 [1.2; 4.7]	0.0140112	83	+++?????	0.6166	0.0325843	PTV_missense_PAI3D_PP.0.001	0.8139	0.3045	2.3 [1.2; 4.1]	0.00968617	99	+++?+???	0.951	0.0399255
ENSG00000276302	AL021997.2	6	28272000	0.00114849	PTV_missense_3_PP.0.001	0.9065	0.2692	2.5 [1.5; 4.2]	0.00114849	249	'-++++-??	0.545	0.00114849	PTV_missense_3_PP.0.001	0.9065	0.2692	2.5 [1.5; 4.2]	0.00114849	249	-++++-??	0.545	0.00114849	PTV.0.001	0.9065	0.2692	2.5 [1.5; 4.2]	0.00114849	249	-++++-??	0.545	NA	NA	NA	NA	NA	NA	NA	NA	NA	0.5221	PTV_missense_3_PP.0.001	0.3252	0.508	1.4 [0.5; 3.7]	0.5221	87	--?++???	0.4809	0.000851289
ENSG00000284484	CPHXL2	16	7.56663e+07	0.00115132	PTVnoflag_missense_3_PP.0.001	0.8815	0.2215	2.4 [1.6; 3.7]	0.000167862	265	'++?+-+?+	0.8272	0.000665501	PTVnoflag_missense_3_PP.0.001	0.8815	0.2215	2.4 [1.6; 3.7]	0.000167862	265	++?+-+?+	0.8272	0.00060371	PTVnoflag.0.001	0.8815	0.2215	2.4 [1.6; 3.7]	0.000167862	265	++?+-+?+	0.8272	0.146821	missense_AlphaMissense_PP.0.001	-0.244	0.1439	0.8 [0.6; 1]	0.08987	754	-+??--??	0.678	0.170162	PTVnoflag_missense_3_PP.0.001	0.7081	0.3423	2 [1; 4]	0.0597762	107	+-?+?+?+	0.3019	0.000607776
ENSG00000119965	C10orf88	10	122932500	0.00115769	PTV_missense_any_PP.0.01	-0.4608	0.1105	0.6 [0.5; 0.8]	3.16619e-05	1933	'--------	0.9752	0.0331837	PTV_missense_any_PP.0.001	-0.4437	0.1479	0.6 [0.5; 0.9]	0.00203951	765	-----?-?	0.8868	0.0710303	PTV.0.001	-0.3193	0.1558	0.7 [0.5; 1]	0.0399301	524	-----???	0.9736	0.00245491	missense_any_PP.0.01	-0.5239	0.1483	0.6 [0.4; 0.8]	0.000505063	1386	---?--++	0.4379	0.01023	PTVnoflag_missense_any_PP.0.01	-0.4832	0.137	0.6 [0.5; 0.8]	0.000505306	858	------+-	0.9759	0.108286
ENSG00000078269	SYNJ2	6	1.57991e+08	0.00116014	missense_AlphaMissense_PP.0.01	-0.1264	0.0303	0.9 [0.8; 0.9]	3.543e-05	14804	'---?-+--	0.354	0.89031	PTV_missense_popEVE_PP.1e-05	0.2748	0.1534	1.3 [1; 1.8]	0.07331	514	++++++??	0.6594	0.228796	PTV.1e-05	0.2748	0.1534	1.3 [1; 1.8]	0.07331	514	++++++??	0.6594	0.000411249	missense_AlphaMissense_PP.0.01	-0.1264	0.0303	0.9 [0.8; 0.9]	3.543e-05	14804	---?-+--	0.354	0.0467741	missense_any_PP.0.01	-0.1117	0.0344	0.9 [0.8; 1]	0.00238329	8793	-+-+-+--	0.1216	0.300145
ENSG00000151789	ZNF385D	3	2.14458e+07	0.00116114	PTVnoflag_missense_AlphaMissense_PP.0.001	0.2766	0.0659	1.3 [1.2; 1.5]	7.03539e-05	2649	'+++?++?-	0.357	0.000926772	PTVnoflag_missense_AlphaMissense_PP.0.001	0.2766	0.0659	1.3 [1.2; 1.5]	7.03539e-05	2649	+++?++?-	0.357	0.037604	PTVnoflag.0.001	1.1483	0.4454	3.2 [1.3; 7.5]	0.0201785	41	+-+?????	0.6239	0.00100289	missense_any_PP.0.001	0.2569	0.0674	1.3 [1.1; 1.5]	0.000257242	2594	+++?++?-	0.3916	0.0403365	PTVnoflag_missense_any_PP.0.001	0.2484	0.0864	1.3 [1.1; 1.5]	0.0083133	1208	+-+?++--	0.1729	0.00380249
ENSG00000126251	GPR42	19	35371850	0.00118147	PTV_missense_PAI3D_PP.0.01	-0.5808	0.1757	0.6 [0.4; 0.8]	0.00100678	1334	'-???-???	0.9611	NA	NA	NA	NA	NA	NA	NA	NA	NA	NA	NA	NA	NA	NA	NA	NA	NA	NA	NA	NA	NA	NA	NA	NA	NA	NA	NA	0.147395	PTV_missense_any_PP.0.01	-0.3041	0.2084	0.7 [0.5; 1.1]	0.1445	601	-???-???	0.2714	0.00127307
ENSG00000151914	DST	6	56459375	0.00119936	PTV_missense_3_PP.0.001	-0.3688	0.1043	0.7 [0.6; 0.8]	0.000489034	1261	'---+---+	0.7082	0.00161912	PTV_missense_3_PP.0.001	-0.3688	0.1043	0.7 [0.6; 0.8]	0.000489034	1261	---+---+	0.7082	0.000719372	PTV.0.001	-0.3688	0.1043	0.7 [0.6; 0.8]	0.000489034	1261	---+---+	0.7082	0.0830254	missense_any_PP.0.01	-0.0999	0.0464	0.9 [0.8; 1]	0.0301843	5936	---+++--	0.3477	0.00462672	PTVnoflag_missense_any_PP.0.01	-0.2008	0.0564	0.8 [0.7; 0.9]	0.000341498	3259	---+----	0.5418	0.163192
ENSG00000118046	STK11	19	1210085	0.00128858	PTV_missense_AlphaMissense_PP.0.001	0.5783	0.1586	1.8 [1.3; 2.4]	0.000188801	469	'+++?+???	0.5433	0.00086158	PTV_missense_AlphaMissense_PP.0.001	0.5783	0.1586	1.8 [1.3; 2.4]	0.000188801	469	+++?+???	0.5433	NA	NA	NA	NA	NA	NA	NA	NA	NA	0.00135188	missense_AlphaMissense_PP.0.001	0.5771	0.1612	1.8 [1.3; 2.4]	0.000243932	451	+++?+???	0.5048	0.0028291	missense_any_PP.1e-05	0.9653	0.2757	2.6 [1.5; 4.5]	0.000341317	111	++-?+?-?	0.03328	0.462859
ENSG00000077009	NMRK2	19	3.93574e+06	0.00129718	PTV_missense_PAI3D_PP.0.01	-0.3823	0.1067	0.7 [0.6; 0.8]	0.000324797	1441	'--?--+-+	0.5307	0.00181045	PTV_missense_PAI3D_PP.0.001	-0.4044	0.1119	0.7 [0.5; 0.8]	0.000380724	1211	--?----+	0.3528	0.000667268	PTV.0.01	-0.3954	0.1121	0.7 [0.5; 0.8]	0.000412631	1253	--?--+-+	0.626	0.882431	missense_REVEL_PP.0.001	0.3202	0.3142	1.4 [0.7; 2.5]	0.3081	129	++?+-???	0.5044	0.00170294	PTV_missense_popEVE_PP.0.01	-0.508	0.1486	0.6 [0.4; 0.8]	0.000434603	596	--?----+	0.5156	0.22411
ENSG00000148672	GLUD1	10	8.70553e+07	0.00136456	missense_PAI3D_PP.0.001	0.4636	0.1165	1.6 [1.3; 2]	9.56724e-05	866	'+++?++-?	0.8443	0.00178365	missense_PAI3D_PP.0.001	0.4636	0.1165	1.6 [1.3; 2]	9.56724e-05	866	+++?++-?	0.8443	0.700082	PTV.0.001	-0.1163	0.237	0.9 [0.6; 1.4]	0.6237	200	---++???	0.6741	0.000486226	missense_PAI3D_PP.0.001	0.4636	0.1165	1.6 [1.3; 2]	9.56724e-05	866	+++?++-?	0.8443	0.679898	missense_PAI3D_PP.0.001	0.3336	0.1664	1.4 [1; 1.9]	0.0428338	373	+++?+-+?	0.985	0.00149249
ENSG00000064419	TNPO3	7	128957200	0.00138616	PTVnoflag_missense_3_PP.1e-05	0.8967	0.217	2.5 [1.6; 3.8]	7.95713e-05	266	'+++++???	0.4075	0.00120431	PTVnoflag_missense_3_PP.1e-05	0.8967	0.217	2.5 [1.6; 3.8]	7.95713e-05	266	+++++???	0.4075	0.00141613	PTVnoflag.1e-05	0.8742	0.2494	2.4 [1.5; 3.9]	0.00101507	184	+++++???	0.3181	0.643502	missense_3_PP.1e-05	1.0448	0.4664	2.8 [1.1; 7.1]	0.0202704	65	++??????	0.5031	0.0428227	PTVnoflag_missense_3_PP.0.001	0.5821	0.2327	1.8 [1.1; 2.8]	0.010356	197	+++-+?-?	0.6243	0.034051
ENSG00000170606	HSPA4	5	1.33052e+08	0.00147938	PTVnoflag_missense_REVEL_PP.0.001	1.0511	0.2625	2.9 [1.7; 4.8]	9.38404e-05	112	'+++?????	0.2061	0.00162303	PTVnoflag_missense_REVEL_PP.0.001	1.0511	0.2625	2.9 [1.7; 4.8]	9.38404e-05	112	+++?????	0.2061	0.00497363	PTVnoflag.0.001	0.8842	0.3064	2.4 [1.3; 4.4]	0.00368349	91	-++?????	0.01512	0.213413	missense_AlphaMissense_PP.1e-05	0.2696	0.1606	1.3 [1; 1.8]	0.0931	480	+-+?-+?+	0.3272	0.00479779	PTVnoflag_missense_REVEL_PP.0.001	1.2264	0.3282	3.4 [1.8; 6.5]	0.000239328	65	+++?????	0.4697	0.241496
ENSG00000154553	PDLIM3	4	185502800	0.00149145	PTV_missense_PAI3D_PP.1e-05	1.027	0.2599	2.8 [1.7; 4.6]	4.08449e-05	174	'++++-???	0.02323	0.000994516	PTV_missense_PAI3D_PP.1e-05	1.027	0.2599	2.8 [1.7; 4.6]	4.08449e-05	174	++++-???	0.02323	0.00476077	PTV.1e-05	1.0672	0.3414	2.9 [1.5; 5.7]	0.0015899	100	++++-???	0.1082	0.0186561	missense_PAI3D_PP.1e-05	1.4971	0.482	4.5 [1.7; 11.5]	0.00130255	59	++??????	0.1254	0.0029317	PTV_missense_PAI3D_PP.1e-05	1.4251	0.3639	4.2 [2; 8.5]	8.59758e-05	64	++????+?	0.6048	0.796743
ENSG00000259330	INAFM2	15	40324250	0.00152262	PTVnoflag_missense_AlphaMissense_PP.0.001	0.7608	0.2191	2.1 [1.4; 3.3]	0.00066192	206	'+++?+???	0.9127	0.00176888	PTVnoflag_missense_AlphaMissense_PP.0.001	0.7608	0.2191	2.1 [1.4; 3.3]	0.00066192	206	+++?+???	0.9127	NA	NA	NA	NA	NA	NA	NA	NA	NA	0.00122347	missense_AlphaMissense_PP.0.001	0.7608	0.2191	2.1 [1.4; 3.3]	0.00066192	206	+++?+???	0.9127	0.00887763	PTVnoflag_missense_AlphaMissense_PP.0.001	0.8521	0.3247	2.3 [1.2; 4.4]	0.00684966	86	+++?????	0.7097	0.0958628
ENSG00000096696	DSP	6	7544700	0.00164918	PTVnoflag_missense_3_PP.0.001	0.4273	0.1252	1.5 [1.2; 2]	0.000503954	775	'++++-???	0.05438	0.00204675	PTVnoflag_missense_3_PP.0.001	0.4273	0.1252	1.5 [1.2; 2]	0.000503954	775	++++-???	0.05438	0.000941507	PTVnoflag.0.001	0.4273	0.1252	1.5 [1.2; 2]	0.000503954	775	++++-???	0.05438	0.0415639	missense_any_PP.0.001	0.0982	0.038	1.1 [1; 1.2]	0.011815	9012	++++-+++	0.0228	0.0477033	PTV_missense_any_PP.1e-05	0.2586	0.0934	1.3 [1.1; 1.6]	0.0101488	1099	+-++++++	0.3604	0.00547254
ENSG00000257315	ZBED6	1	2.03798e+08	0.00169317	missense_AlphaMissense_PP.0.001	0.3332	0.0938	1.4 [1.2; 1.7]	0.000350932	1503	'++??++-+	0.5113	0.00164036	missense_AlphaMissense_PP.0.001	0.3332	0.0938	1.4 [1.2; 1.7]	0.000350932	1503	++??++-+	0.5113	0.55533	PTV.1e-05	0.1464	0.219	1.2 [0.8; 1.8]	0.5038	277	++?-+???	0.6195	0.000732744	missense_AlphaMissense_PP.0.001	0.3332	0.0938	1.4 [1.2; 1.7]	0.000350932	1503	++??++-+	0.5113	0.578929	missense_AlphaMissense_PP.0.001	0.2631	0.1244	1.3 [1; 1.7]	0.0291106	691	++??++-+	0.5419	0.00852201
ENSG00000255663	NA	11	114400500	0.0016982	PTV_missense_any_PP.0.001	1.2272	0.3877	3.4 [1.6; 7.3]	0.0016982	54	'++??????	0.9188	0.0016982	PTV_missense_any_PP.0.001	1.2272	0.3877	3.4 [1.6; 7.3]	0.0016982	54	++??????	0.9188	NA	NA	NA	NA	NA	NA	NA	NA	NA	0.0016982	missense_any_PP.0.001	1.2272	0.3877	3.4 [1.6; 7.3]	0.0016982	54	++??????	0.9188	0.0231871	PTV_missense_any_PP.0.001	1.2571	0.5189	3.5 [1.3; 9.7]	0.0231871	25	++??????	0.6204	0.0218573
ENSG00000160293	VAV2	9	133766250	0.00170147	PTVnoflag_missense_AlphaMissense_PP.1e-05	0.4398	0.1122	1.6 [1.2; 1.9]	0.000115092	906	'++++++--	0.1207	0.00154185	PTVnoflag_missense_AlphaMissense_PP.1e-05	0.4398	0.1122	1.6 [1.2; 1.9]	0.000115092	906	++++++--	0.1207	0.0184529	PTVnoflag.1e-05	0.7241	0.2517	2.1 [1.3; 3.4]	0.00682323	164	+-+++???	0.4331	0.00460168	missense_AlphaMissense_PP.0.001	0.2455	0.0789	1.3 [1.1; 1.5]	0.00185241	2019	+++?++-+	0.3525	0.0254855	PTVnoflag_missense_AlphaMissense_PP.1e-05	0.447	0.1458	1.6 [1.2; 2.1]	0.00231972	411	++++++--	0.2193	0.0319897
ENSG00000132002	DNAJB1	19	14515940	0.00178099	PTV_missense_any_PP.1e-05	0.6816	0.1666	2 [1.4; 2.7]	4.81903e-05	420	'+++++???	0.08699	0.00125679	PTV_missense_any_PP.1e-05	0.6816	0.1666	2 [1.4; 2.7]	4.81903e-05	420	+++++???	0.08699	0.133935	PTV.0.001	0.3246	0.2122	1.4 [0.9; 2.1]	0.1262	269	++--++??	0.9291	0.0035337	missense_any_PP.1e-05	0.6607	0.1846	1.9 [1.3; 2.8]	0.000309461	339	++++-???	0.122	0.013225	PTV_missense_any_PP.0.001	0.3817	0.1332	1.5 [1.1; 1.9]	0.0018989	583	++++++--	0.09972	0.195141
ENSG00000136002	ARHGEF4	2	130900000	0.00180756	missense_any_PP.1e-05	-0.6483	0.1634	0.5 [0.4; 0.7]	6.83151e-05	500	'--------	0.9068	0.00122374	missense_any_PP.1e-05	-0.6483	0.1634	0.5 [0.4; 0.7]	6.83151e-05	500	--------	0.9068	0.367816	PTVnoflag.0.001	0.3133	0.2169	1.4 [0.9; 2.1]	0.1486	213	++---???	0.2762	0.000620801	missense_any_PP.1e-05	-0.6483	0.1634	0.5 [0.4; 0.7]	6.83151e-05	500	--------	0.9068	0.809116	missense_AlphaMissense_PP.1e-05	-0.4752	0.214	0.6 [0.4; 0.9]	0.0233057	213	---?++--	0.8553	0.0166073
ENSG00000089847	ANKRD24	19	4194100	0.00182709	missense_AlphaMissense_PP.0.01	0.2046	0.0529	1.2 [1.1; 1.4]	6.92042e-05	4155	'+++?++++	0.766	0.232233	missense_any_PP.1e-05	0.4336	0.1615	1.5 [1.1; 2.1]	0.0108785	426	+++?+-+?	0.2665	0.947451	PTVnoflag.1e-05	0.0805	0.1666	1.1 [0.8; 1.5]	0.6288	459	+-+-+-??	0.5173	0.000612746	missense_AlphaMissense_PP.0.01	0.2046	0.0529	1.2 [1.1; 1.4]	6.92042e-05	4155	+++?++++	0.766	0.00289753	missense_AlphaMissense_PP.0.01	0.2669	0.0687	1.3 [1.1; 1.5]	0.000125751	1866	+++?++++	0.9646	0.657883
ENSG00000117868	ESYT2	7	158735400	0.00187972	missense_REVEL_PP.1e-05	-1.1929	0.3466	0.3 [0.2; 0.6]	9.17482e-05	159	'--+--???	0.06888	0.0012595	missense_REVEL_PP.1e-05	-1.1929	0.3466	0.3 [0.2; 0.6]	9.17482e-05	159	--+--???	0.06888	0.265501	PTV.1e-05	-0.3552	0.2345	0.7 [0.4; 1.1]	0.1298	220	----+???	0.8021	0.000818747	missense_REVEL_PP.1e-05	-1.1929	0.3466	0.3 [0.2; 0.6]	9.17482e-05	159	--+--???	0.06888	0.0197086	PTV_missense_REVEL_PP.1e-05	-0.9549	0.2834	0.4 [0.2; 0.7]	0.000716081	175	-----?-?	0.4611	0.202646
ENSG00000242515	UGT1A10	2	233636000	0.00188884	PTV_missense_popEVE_PP.0.001	-0.5989	0.1697	0.5 [0.4; 0.8]	0.000288254	579	'--?---??	0.4786	0.00135411	PTV_missense_popEVE_PP.0.001	-0.5989	0.1697	0.5 [0.4; 0.8]	0.000288254	579	--?---??	0.4786	0.000813528	PTV.0.001	-0.5989	0.1697	0.5 [0.4; 0.8]	0.000288254	579	--?---??	0.4786	0.576206	missense_REVEL_PP.1e-05	-0.3599	0.2386	0.7 [0.4; 1.1]	0.1316	202	--?--++?	0.3823	0.00213904	PTV_missense_popEVE_PP.0.001	-0.7369	0.218	0.5 [0.3; 0.7]	0.00028611	267	--?---?+	0.1212	0.191843
ENSG00000157510	AFAP1L1	5	1.49289e+08	0.00190111	PTVnoflag_missense_popEVE_PP.0.001	0.4344	0.1251	1.5 [1.2; 2]	0.000528365	820	'+++++++?	0.8924	0.00249564	PTVnoflag_missense_popEVE_PP.0.001	0.4344	0.1251	1.5 [1.2; 2]	0.000528365	820	+++++++?	0.8924	0.000859663	PTVnoflag.0.001	0.4344	0.1251	1.5 [1.2; 2]	0.000528365	820	+++++++?	0.8924	0.653022	missense_AlphaMissense_PP.1e-05	0.3139	0.208	1.4 [0.9; 2.1]	0.1312	315	+++?+--?	0.8352	0.311253	PTV_missense_any_PP.0.001	0.17	0.0877	1.2 [1; 1.4]	0.0527	1352	++++-++-	0.4098	0.00384228
ENSG00000129007	CALML4	15	68194000	0.00191012	PTV_missense_3_PP.0.01	-0.1958	0.0561	0.8 [0.7; 0.9]	0.000377855	4339	'------++	0.6593	0.591688	missense_REVEL_PP.0.001	-0.1398	0.1035	0.9 [0.7; 1.1]	0.1769	1314	+-----??	0.1233	0.00117044	PTV.0.01	-0.1954	0.0561	0.8 [0.7; 0.9]	0.000388243	4335	------++	0.6387	0.366537	missense_REVEL_PP.0.001	-0.1398	0.1035	0.9 [0.7; 1.1]	0.1769	1314	+-----??	0.1233	0.510256	PTVnoflag_missense_REVEL_PP.1e-05	0.7274	0.4572	2.1 [0.8; 5.1]	0.1116	48	++?????+	0.747	0.00157112
ENSG00000174038	C9orf131	9	35042250	0.00192571	PTV_missense_3_PP.1e-05	2.0781	0.5677	8 [2.6; 24.3]	0.000359973	24	'++??????	0.5761	0.00135835	PTV_missense_3_PP.1e-05	2.0781	0.5677	8 [2.6; 24.3]	0.000359973	24	++??????	0.5761	0.000959591	PTV.1e-05	2.0781	0.5677	8 [2.6; 24.3]	0.000359973	24	++??????	0.5761	0.801662	missense_AlphaMissense_PP.1e-05	0.2016	0.4708	1.2 [0.5; 3.1]	0.6685	49	++??????	0.8905	0.336079	PTV_missense_AlphaMissense_PP.1e-05	0.8581	0.5193	2.4 [0.9; 6.5]	0.09846	35	++??????	0.6513	0.145249
ENSG00000171295	ZNF440	19	11814450	0.00192759	PTVnoflag_missense_AlphaMissense_PP.1e-05	1.0117	0.2453	2.8 [1.7; 4.4]	0.000128924	198	'+++?+???	0.07607	0.00126717	PTVnoflag_missense_AlphaMissense_PP.1e-05	1.0117	0.2453	2.8 [1.7; 4.4]	0.000128924	198	+++?+???	0.07607	0.132923	PTV.0.01	0.0708	0.0345	1.1 [1; 1.1]	0.0487666	10523	+++-+++-	0.1744	0.000964472	missense_AlphaMissense_PP.1e-05	0.9878	0.2533	2.7 [1.6; 4.4]	0.000325074	190	+++?+???	0.05273	0.0122698	PTV_missense_AlphaMissense_PP.0.001	0.2391	0.0729	1.3 [1.1; 1.5]	0.0011598	1832	+++-++++	0.07431	0.586549
ENSG00000161547	SRSF2	17	7.67362e+07	0.00195541	PTV_missense_any_PP.0.001	0.4068	0.1096	1.5 [1.2; 1.9]	0.00112517	570	'++??+++-	0.4424	0.00259545	PTV_missense_any_PP.0.001	0.4068	0.1096	1.5 [1.2; 1.9]	0.00112517	570	++??+++-	0.4424	NA	NA	NA	NA	NA	NA	NA	NA	NA	0.00209215	missense_any_PP.0.001	0.4055	0.1098	1.5 [1.2; 1.9]	0.00128277	566	++??+++-	0.424	0.00321446	PTV_missense_any_PP.0.001	0.4253	0.1242	1.5 [1.2; 2]	0.002931	400	++??+-+-	0.3961	0.0973854
ENSG00000167895	TMC8	17	7.81317e+07	0.00196023	missense_PAI3D_PP.0.001	1.147	0.2933	3.1 [1.8; 5.6]	0.000127639	126	'++??+???	0.2772	0.00208706	missense_PAI3D_PP.0.001	1.147	0.2933	3.1 [1.8; 5.6]	0.000127639	126	++??+???	0.2772	0.256199	PTV.1e-05	0.3603	0.2105	1.4 [0.9; 2.2]	0.08696	266	++++--??	0.6463	0.000663644	missense_PAI3D_PP.0.001	1.147	0.2933	3.1 [1.8; 5.6]	0.000127639	126	++??+???	0.2772	0.0501185	missense_PAI3D_PP.0.001	1.1594	0.4107	3.2 [1.4; 7.1]	0.0036758	44	++??????	0.31	0.0928694
ENSG00000128591	FLNC	7	128832500	0.00199912	PTVnoflag_missense_PAI3D_PP.0.001	0.1467	0.0372	1.2 [1.1; 1.2]	0.000118262	9499	'++-+++-+	0.1982	0.00137354	PTVnoflag_missense_PAI3D_PP.0.001	0.1467	0.0372	1.2 [1.1; 1.2]	0.000118262	9499	++-+++-+	0.1982	0.0112337	PTV.1e-05	0.5852	0.1948	1.8 [1.2; 2.6]	0.00699394	269	++-++???	0.08973	0.00666652	missense_PAI3D_PP.0.001	0.1301	0.0381	1.1 [1.1; 1.2]	0.000784391	9160	++??++-+	0.5819	0.178692	PTV_missense_PAI3D_PP.0.001	0.1109	0.049	1.1 [1; 1.2]	0.0246514	4503	++-+++-+	0.5165	5.2362e-05
ENSG00000184182	UBE2F	2	2.37993e+08	0.00200951	PTV_missense_REVEL_PP.0.001	1.3591	0.3683	3.9 [1.9; 8]	0.000524309	57	'+++?????	0.3659	0.00180169	PTV_missense_REVEL_PP.0.001	1.3591	0.3683	3.9 [1.9; 8]	0.000524309	57	+++?????	0.3659	NA	NA	NA	NA	NA	NA	NA	NA	NA	0.0442401	missense_AlphaMissense_PP.1e-05	0.9251	0.398	2.5 [1.2; 5.5]	0.0266933	50	++??????	0.9433	0.00341244	PTVnoflag_missense_AlphaMissense_PP.0.001	1.2407	0.4071	3.5 [1.6; 7.7]	0.00235684	37	++??????	0.9371	0.440348
ENSG00000144824	PHLDB2	3	111884125	0.0020199	PTV_missense_3_PP.0.001	-0.3384	0.0934	0.7 [0.6; 0.9]	0.000187699	1690	'----+--+	0.715	0.00259747	PTV_missense_3_PP.0.001	-0.3384	0.0934	0.7 [0.6; 0.9]	0.000187699	1690	----+--+	0.715	0.17798	PTV.1e-05	-0.309	0.2092	0.7 [0.5; 1.1]	0.1397	294	-+---???	0.8198	0.00162446	missense_3_PP.0.001	-0.4095	0.1168	0.7 [0.5; 0.8]	0.000277164	1099	--??---+	0.6672	0.00992883	missense_3_PP.0.001	-0.4979	0.1545	0.6 [0.4; 0.8]	0.000549675	509	--??+-++	0.2861	0.023009
ENSG00000203907	OOEP	6	73369000	0.00206238	PTV_missense_3_PP.0.001	-1.0001	0.3079	0.4 [0.2; 0.7]	0.000454906	212	'-----???	0.3604	0.00256522	PTV_missense_3_PP.0.001	-1.0001	0.3079	0.4 [0.2; 0.7]	0.000454906	212	-----???	0.3604	0.00115557	PTV.0.001	-1.0001	0.3079	0.4 [0.2; 0.7]	0.000454906	212	-----???	0.3604	0.285709	missense_AlphaMissense_PP.1e-05	0.5651	0.5048	1.8 [0.7; 4.7]	0.2629	42	-+??????	0.2484	0.0275655	PTV_missense_3_PP.0.001	-0.8669	0.3765	0.4 [0.2; 0.9]	0.00975631	90	-----???	0.4616	0.0256699
ENSG00000060491	OGFR	20	62805000	0.00211378	missense_3_PP.0.001	1.9691	0.5166	7.2 [2.6; 19.7]	0.000151084	24	'++??????	0.1607	0.00246939	missense_3_PP.0.001	1.9691	0.5166	7.2 [2.6; 19.7]	0.000151084	24	++??????	0.1607	0.491468	PTV.0.001	0.4876	0.4067	1.6 [0.7; 3.6]	0.2305	74	-?+++???	0.4055	0.000722595	missense_3_PP.0.001	1.9691	0.5166	7.2 [2.6; 19.7]	0.000151084	24	++??????	0.1607	0.899021	PTVnoflag_missense_REVEL_PP.1e-05	1.0872	0.6449	3 [0.8; 10.5]	0.09183	22	++??????	0.1493	0.143817
ENSG00000286112	AL441992.2	9	128833600	0.00219326	PTV_missense_3_PP.1e-05	-1.0397	0.2893	0.4 [0.2; 0.6]	0.000379612	190	'-----???	0.9433	0.00152699	PTV_missense_3_PP.1e-05	-1.0397	0.2893	0.4 [0.2; 0.6]	0.000379612	190	-----???	0.9433	0.00127221	PTV.1e-05	-1.0397	0.2893	0.4 [0.2; 0.6]	0.000379612	190	-----???	0.9433	0.0167201	missense_any_PP.1e-05	0.5799	0.2138	1.8 [1.2; 2.7]	0.00557495	297	+++++???	0.9072	0.0111468	PTV_missense_3_PP.1e-05	-1.21	0.4273	0.3 [0.1; 0.7]	0.00440309	71	--?-????	0.8231	0.112502
ENSG00000276070	CCL4L2	17	36211000	0.00222675	PTV_missense_3_PP.0.001	0.7665	0.2405	2.2 [1.3; 3.4]	0.00165352	195	'+?++????	0.6383	0.00222675	PTV_missense_3_PP.0.001	0.7665	0.2405	2.2 [1.3; 3.4]	0.00165352	195	+?++????	0.6383	0.00215477	PTV.0.001	0.7665	0.2405	2.2 [1.3; 3.4]	0.00165352	195	+?++????	0.6383	NA	NA	NA	NA	NA	NA	NA	NA	NA	0.00229169	PTV_missense_AlphaMissense_PP.0.001	0.9248	0.2909	2.5 [1.4; 4.5]	0.00150057	106	+??+????	0.4645	0.173637
ENSG00000206053	JPT2	16	1.67833e+06	0.00223779	PTV_missense_3_PP.0.001	1.5788	0.4391	4.8 [2.1; 11.5]	0.000756739	47	'-++-????	0.02802	0.00298599	PTV_missense_3_PP.0.001	1.5788	0.4391	4.8 [2.1; 11.5]	0.000756739	47	-++-????	0.02802	0.00113558	PTV.0.001	1.5788	0.4391	4.8 [2.1; 11.5]	0.000756739	47	-++-????	0.02802	0.404636	missense_any_PP.0.001	-0.2201	0.2039	0.8 [0.5; 1.2]	0.2804	294	---?+???	0.4206	0.933613	PTV_missense_PAI3D_PP.0.001	0.8298	0.534	2.3 [0.8; 6.5]	0.1202	25	-?+?????	0.07742	0.0164154
ENSG00000005059	MCUB	4	109560400	0.00227917	PTV_missense_popEVE_PP.1e-05	1.0116	0.2583	2.7 [1.7; 4.6]	0.000227561	164	'+++-+???	0.3688	0.0015154	PTV_missense_popEVE_PP.1e-05	1.0116	0.2583	2.7 [1.7; 4.6]	0.000227561	164	+++-+???	0.3688	0.00103479	PTV.1e-05	1.0116	0.2583	2.7 [1.7; 4.6]	0.000227561	164	+++-+???	0.3688	0.622312	missense_any_PP.1e-05	-0.4824	0.3853	0.6 [0.3; 1.3]	0.2106	99	-+-?-???	0.4977	0.260135	missense_AlphaMissense_PP.0.001	0.53	0.2432	1.7 [1.1; 2.7]	0.018968	160	+++??-??	0.01927	0.0423585
ENSG00000155792	DEPTOR	8	119884800	0.00231662	PTVnoflag_missense_REVEL_PP.1e-05	0.9396	0.2347	2.6 [1.6; 4.1]	0.00013197	182	'++++-???	0.2059	0.00161931	PTVnoflag_missense_REVEL_PP.1e-05	0.9396	0.2347	2.6 [1.6; 4.1]	0.00013197	182	++++-???	0.2059	0.00368839	PTVnoflag.1e-05	0.8394	0.2601	2.3 [1.4; 3.9]	0.0013967	165	++++-???	0.1724	0.0663038	missense_3_PP.0.001	1.3331	0.6202	3.8 [1.1; 12.8]	0.0275169	26	++??????	0.7151	0.0420677	PTV_missense_3_PP.1e-05	1.1233	0.441	3.1 [1.3; 7.3]	0.00857722	54	++??????	0.3298	0.108962
ENSG00000114200	BCHE	3	1.65776e+08	0.00232534	missense_AlphaMissense_PP.0.001	0.3172	0.0809	1.4 [1.2; 1.6]	0.000144403	1866	'+++?++-+	0.6889	0.00245078	missense_AlphaMissense_PP.0.001	0.3172	0.0809	1.4 [1.2; 1.6]	0.000144403	1866	+++?++-+	0.6889	0.859587	PTV.0.01	0.1386	0.0851	1.1 [1; 1.4]	0.1033	1774	++++---+	0.1714	0.00144209	missense_AlphaMissense_PP.0.001	0.3172	0.0809	1.4 [1.2; 1.6]	0.000144403	1866	+++?++-+	0.6889	0.0402816	PTV_missense_AlphaMissense_PP.0.001	0.2327	0.0789	1.3 [1.1; 1.5]	0.00303553	1622	++++++-+	0.7352	0.0176911
ENSG00000152270	PDE3B	11	14662000	0.00232681	PTV_missense_PAI3D_PP.0.01	0.2123	0.0532	1.2 [1.1; 1.4]	8.39382e-05	4130	'++++++++	0.4928	0.201481	PTV_missense_PAI3D_PP.0.001	0.1702	0.0658	1.2 [1; 1.3]	0.00973174	2734	+++-++++	0.9786	0.0041618	PTV.0.01	0.2419	0.0717	1.3 [1.1; 1.5]	0.00126878	2231	+++++++-	0.3453	0.664986	missense_PAI3D_PP.0.001	0.1905	0.0805	1.2 [1; 1.4]	0.0212795	1877	+++?++++	0.8935	0.874606	PTVnoflag_missense_popEVE_PP.0.01	0.2278	0.0973	1.3 [1; 1.5]	0.0315608	969	+-++-++-	0.06032	0.00398753
ENSG00000068137	PLEKHH3	17	42668375	0.00238628	PTVnoflag_missense_PAI3D_PP.0.01	0.2468	0.0605	1.3 [1.1; 1.4]	5.01659e-05	3207	'++++++-+	0.1508	0.283509	PTVnoflag_missense_popEVE_PP.0.001	0.3756	0.195	1.5 [1; 2.1]	0.05401	301	-++++???	0.1218	0.100035	PTVnoflag.0.001	0.3756	0.195	1.5 [1; 2.1]	0.05401	301	-++++???	0.1218	0.00410323	missense_PAI3D_PP.0.01	0.2307	0.0637	1.3 [1.1; 1.4]	0.000398462	2901	+++?++-+	0.5926	0.130281	PTVnoflag_missense_PAI3D_PP.0.01	0.2185	0.0772	1.2 [1.1; 1.4]	0.00504648	1511	++++++--	0.1602	0.0404236
ENSG00000122779	TRIM24	7	138482500	0.00238805	missense_3_PP.0.001	1.7258	0.4213	5.6 [2.5; 12.8]	0.00013779	34	'+?+?????	0.5529	0.00282462	missense_3_PP.0.001	1.7258	0.4213	5.6 [2.5; 12.8]	0.00013779	34	+?+?????	0.5529	0.840022	PTVnoflag.1e-05	-0.2868	0.4154	0.8 [0.3; 1.7]	0.49	67	+--?????	0.1987	0.000798353	missense_3_PP.0.001	1.7258	0.4213	5.6 [2.5; 12.8]	0.00013779	34	+?+?????	0.5529	0.0104164	missense_3_PP.0.001	1.8166	0.5081	6.2 [2.3; 16.7]	0.000780588	20	+?+?????	0.9435	0.429954
ENSG00000184347	SLIT3	5	168668750	0.00238937	missense_any_PP.0.01	0.1461	0.035	1.2 [1.1; 1.2]	7.52077e-05	10441	'+++-+-++	0.1298	0.0256839	missense_any_PP.0.001	0.1336	0.0392	1.1 [1.1; 1.2]	0.00154215	8027	+++-+--+	0.04338	0.552232	PTV.0.001	-0.1358	0.1856	0.9 [0.6; 1.3]	0.4642	349	--+--???	0.768	0.00104694	missense_any_PP.0.01	0.1461	0.035	1.2 [1.1; 1.2]	7.52077e-05	10441	+++-+-++	0.1298	0.395953	missense_any_PP.0.01	0.1113	0.0474	1.1 [1; 1.2]	0.019364	4695	+++-+--+	0.4258	0.00796249
ENSG00000096384	HSP90AB1	6	44249000	0.0024384	missense_3_PP.0.001	1.3284	0.3265	3.8 [2; 7.2]	0.000129339	99	'++??+???	0.2192	0.00312692	missense_3_PP.0.001	1.3284	0.3265	3.8 [2; 7.2]	0.000129339	99	++??+???	0.2192	0.49631	PTV.1e-05	-0.253	0.3516	0.8 [0.4; 1.5]	0.4718	110	-+-?????	0.8206	0.00083081	missense_3_PP.0.001	1.3284	0.3265	3.8 [2; 7.2]	0.000129339	99	++??+???	0.2192	0.309259	missense_REVEL_PP.0.001	0.7517	0.2838	2.1 [1.2; 3.7]	0.0160406	98	++-++???	0.1098	0.0893613
ENSG00000159023	EPB41	1	28987400	0.00251844	PTV_missense_3_PP.1e-05	0.8334	0.2181	2.3 [1.5; 3.5]	0.000331177	186	'+++-+???	0.3913	0.0016974	PTV_missense_3_PP.1e-05	0.8334	0.2181	2.3 [1.5; 3.5]	0.000331177	186	+++-+???	0.3913	0.00127368	PTV.1e-05	0.8334	0.2181	2.3 [1.5; 3.5]	0.000331177	186	+++-+???	0.3913	0.464767	missense_any_PP.0.01	-0.0425	0.0287	1 [0.9; 1]	0.1383	16223	-+-+----	0.2261	0.00650519	PTVnoflag_missense_3_PP.0.001	0.7446	0.2156	2.1 [1.4; 3.2]	0.00187311	154	+-++?-??	0.453	0.903202
ENSG00000152795	HNRNPDL	4	82426750	0.00252023	missense_any_PP.1e-05	-1.0394	0.3068	0.4 [0.2; 0.6]	0.0001592	207	'---?+???	0.07431	0.0017052	missense_any_PP.1e-05	-1.0394	0.3068	0.4 [0.2; 0.6]	0.0001592	207	---?+???	0.07431	0.323292	PTV.0.001	-0.353	0.2602	0.7 [0.4; 1.2]	0.175	169	-+---???	0.5707	0.00087907	missense_any_PP.1e-05	-1.0394	0.3068	0.4 [0.2; 0.6]	0.0001592	207	---?+???	0.07431	0.702576	missense_AlphaMissense_PP.1e-05	-0.8398	0.4388	0.4 [0.2; 1]	0.05563	68	--???+??	0.07381	0.0558922
ENSG00000085978	ATG16L1	2	233257750	0.0025639	PTV_missense_REVEL_PP.0.001	-1.138	0.3732	0.3 [0.2; 0.7]	0.00100136	90	'---?-???	0.2456	0.00256948	PTV_missense_REVEL_PP.0.001	-1.138	0.3732	0.3 [0.2; 0.7]	0.00100136	90	---?-???	0.2456	0.00131591	PTV.0.001	-2.3645	0.682	0.1 [0; 0.4]	0.00131591	46	--??????	0.6014	0.492697	missense_PAI3D_PP.0.001	0.3361	0.2611	1.4 [0.8; 2.3]	0.1981	213	+++?-???	0.9147	0.00519911	PTV_missense_popEVE_PP.0.001	-2.0399	0.6813	0.1 [0; 0.5]	0.0022024	22	--??????	0.09197	0.231655
ENSG00000213563	C8orf82	8	1.44528e+08	0.00259127	missense_AlphaMissense_PP.0.01	-0.4262	0.1194	0.7 [0.5; 0.8]	0.0002131	1133	'--??--+-	0.4643	0.00459618	missense_AlphaMissense_PP.0.001	-0.4234	0.1238	0.7 [0.5; 0.8]	0.000388558	992	--??--+-	0.4657	0.376049	PTV.0.001	-0.1842	0.1935	0.8 [0.6; 1.2]	0.3412	403	-+-+-???	0.1888	0.000989682	missense_AlphaMissense_PP.0.01	-0.4262	0.1194	0.7 [0.5; 0.8]	0.0002131	1133	--??--+-	0.4643	0.010468	missense_AlphaMissense_PP.0.01	-0.4335	0.1466	0.6 [0.5; 0.9]	0.00176184	506	--??--+-	0.4605	0.38294
ENSG00000183072	NKX2-5	5	1.73233e+08	0.00260447	PTV_missense_AlphaMissense_PP.0.001	0.5333	0.1382	1.7 [1.3; 2.2]	0.000366031	631	'+++?++?+	0.3853	0.00260786	PTV_missense_AlphaMissense_PP.0.001	0.5333	0.1382	1.7 [1.3; 2.2]	0.000366031	631	+++?++?+	0.3853	NA	NA	NA	NA	NA	NA	NA	NA	NA	0.0218964	missense_AlphaMissense_PP.0.001	0.451	0.1468	1.6 [1.2; 2.1]	0.00347281	596	+++?++?+	0.5212	0.0547496	PTV_missense_any_PP.0.01	0.3074	0.1023	1.4 [1.1; 1.7]	0.00343094	839	++++-+++	0.2013	0.00690974
ENSG00000185658	BRWD1	21	3.91997e+07	0.00264189	missense_REVEL_PP.0.001	1.0426	0.2781	2.8 [1.6; 4.9]	0.000161553	119	'-++?????	0.01201	0.00348342	missense_REVEL_PP.0.001	1.0426	0.2781	2.8 [1.6; 4.9]	0.000161553	119	-++?????	0.01201	0.101026	PTV.1e-05	0.3243	0.1952	1.4 [0.9; 2]	0.09658	323	+++-+???	0.6652	0.00108582	missense_REVEL_PP.0.001	1.0426	0.2781	2.8 [1.6; 4.9]	0.000161553	119	-++?????	0.01201	0.00399813	missense_REVEL_PP.0.001	1.3093	0.4199	3.7 [1.6; 8.4]	0.000289192	49	+++?????	0.02981	0.0708409
ENSG00000137878	GCOM1	15	57596875	0.00273164	PTVnoflag_missense_AlphaMissense_PP.0.001	0.2536	0.0756	1.3 [1.1; 1.5]	0.000665863	2311	'++++++-+	0.6605	0.00354942	PTVnoflag_missense_AlphaMissense_PP.0.001	0.2536	0.0756	1.3 [1.1; 1.5]	0.000665863	2311	++++++-+	0.6605	0.00176607	PTVnoflag.0.001	0.4263	0.1328	1.5 [1.2; 2]	0.000974058	650	++++++??	0.3028	0.142271	missense_AlphaMissense_PP.0.001	0.1845	0.0924	1.2 [1; 1.4]	0.0471952	1647	++??++-+	0.9254	0.0216103	PTV_missense_any_PP.0.01	0.2583	0.0934	1.3 [1.1; 1.6]	0.00343009	1203	++++++-+	0.5266	0.0739311
ENSG00000079387	SENP1	12	48045750	0.00275069	PTV_missense_3_PP.0.001	1.0906	0.3255	3 [1.6; 5.6]	0.00102665	86	'++++????	0.5383	0.002921	PTV_missense_3_PP.0.001	1.0906	0.3255	3 [1.6; 5.6]	0.00102665	86	++++????	0.5383	0.00151847	PTV.0.001	1.1346	0.3531	3.1 [1.6; 6.2]	0.00120738	71	++++????	0.2961	0.105474	missense_PAI3D_PP.0.001	0.6731	0.3031	2 [1.1; 3.6]	0.0466562	95	+-+?????	0.5133	0.00655329	PTV_missense_PAI3D_PP.0.001	1.0364	0.2901	2.8 [1.6; 5]	0.000808664	75	+++?????	0.9712	0.120827
ENSG00000163050	COQ8A	1	226965000	0.00280192	PTV_missense_any_PP.0.01	0.1979	0.0553	1.2 [1.1; 1.4]	0.000421637	3876	'+++++--+	0.5336	0.00447188	PTV_missense_any_PP.0.001	0.1943	0.0556	1.2 [1.1; 1.4]	0.000586396	3831	+++++--+	0.4666	0.17198	PTV.0.001	0.1814	0.1215	1.2 [0.9; 1.5]	0.1354	843	++++++--	0.4211	0.00156096	missense_any_PP.0.01	0.2175	0.062	1.2 [1.1; 1.4]	0.000556055	3095	+++-+--+	0.5739	0.00309335	PTV_missense_any_PP.0.01	0.263	0.0707	1.3 [1.1; 1.5]	0.000225101	1860	+++++--+	0.1865	0.771976
ENSG00000165006	UBAP1	9	34227600	0.00281571	PTV_missense_popEVE_PP.0.001	1.9133	0.534	6.8 [2.4; 19.3]	0.00116153	25	'+?+?????	0.8358	0.00290828	PTV_missense_popEVE_PP.0.001	1.9133	0.534	6.8 [2.4; 19.3]	0.00116153	25	+?+?????	0.8358	0.00116153	PTV.0.001	1.9133	0.534	6.8 [2.4; 19.3]	0.00116153	25	+?+?????	0.8358	0.758	missense_any_PP.0.001	-0.1183	0.3838	0.9 [0.4; 1.9]	0.758	96	--??+???	0.8645	NA	NA	NA	NA	NA	NA	NA	NA	NA	0.194859
ENSG00000177697	CD151	11	836419	0.00284712	missense_any_PP.0.001	-0.3322	0.0915	0.7 [0.6; 0.9]	0.00029217	1642	'----+---	0.4688	0.00377896	missense_any_PP.0.001	-0.3322	0.0915	0.7 [0.6; 0.9]	0.00029217	1642	----+---	0.4688	0.168758	PTV.1e-05	0.6927	0.3978	2 [0.9; 4.4]	0.08167	88	+-+++???	0.278	0.00104637	missense_any_PP.0.001	-0.3322	0.0915	0.7 [0.6; 0.9]	0.00029217	1642	----+---	0.4688	0.387598	missense_AlphaMissense_PP.0.001	-0.2737	0.1414	0.8 [0.6; 1]	0.05292	564	-+??----	0.4263	0.00380187
ENSG00000235750	KIAA0040	1	175160800	0.00291875	PTV_missense_any_PP.0.01	-0.2453	0.071	0.8 [0.7; 0.9]	0.000451646	3367	'---+-???	0.1285	0.206499	missense_any_PP.0.001	-0.7862	0.5139	0.5 [0.2; 1.2]	0.1261	61	---?-???	0.7046	0.00224084	PTV.0.01	-0.2383	0.0727	0.8 [0.7; 0.9]	0.00112343	3151	-?-+-???	0.3489	0.16866	missense_any_PP.0.001	-0.7862	0.5139	0.5 [0.2; 1.2]	0.1261	61	---?-???	0.7046	0.0953608	PTV_missense_AlphaMissense_PP.0.01	-0.2044	0.0927	0.8 [0.7; 1]	0.0202707	1458	---?+-??	0.1251	0.0208708
ENSG00000142627	EPHA2	1	16129875	0.00293109	PTV_missense_PAI3D_PP.0.001	-0.2943	0.0811	0.7 [0.6; 0.9]	0.000239442	2086	'---+----	0.842	0.00208536	PTV_missense_PAI3D_PP.0.001	-0.2943	0.0811	0.7 [0.6; 0.9]	0.000239442	2086	---+----	0.842	0.96874	PTV.0.001	-0.2154	0.1733	0.8 [0.6; 1.1]	0.2139	386	---++???	0.9795	0.00204885	missense_PAI3D_PP.0.001	-0.3214	0.0914	0.7 [0.6; 0.9]	0.000340215	1689	---?----	0.7544	0.112453	missense_PAI3D_PP.0.001	-0.2817	0.1148	0.8 [0.6; 0.9]	0.011426	770	---?----	0.9184	0.00755049
ENSG00000135365	PHF21A	11	45941600	0.0029482	PTVnoflag_missense_PAI3D_PP.0.001	0.5732	0.1638	1.8 [1.3; 2.4]	0.000506615	366	'+++++???	0.622	0.0036784	PTVnoflag_missense_PAI3D_PP.0.001	0.5732	0.1638	1.8 [1.3; 2.4]	0.000506615	366	+++++???	0.622	0.00174234	PTVnoflag.0.001	0.8995	0.2584	2.5 [1.5; 4.1]	0.000838196	98	+?++????	0.8069	0.163762	missense_PAI3D_PP.1e-05	0.5939	0.3164	1.8 [1; 3.4]	0.06052	134	++??+???	0.5496	0.0340945	PTVnoflag_missense_PAI3D_PP.0.001	0.5601	0.2117	1.8 [1.2; 2.7]	0.00837371	182	++++-???	0.4995	0.164032
ENSG00000158669	GPAT4	8	41604500	0.00295878	missense_3_PP.0.001	0.7144	0.1933	2 [1.4; 3]	0.000459704	330	'+++?+???	0.9259	0.00389085	missense_3_PP.0.001	0.7144	0.1933	2 [1.4; 3]	0.000459704	330	+++?+???	0.9259	NA	NA	NA	NA	NA	NA	NA	NA	NA	0.00291872	missense_3_PP.0.001	0.7144	0.1933	2 [1.4; 3]	0.000459704	330	+++?+???	0.9259	0.00844218	missense_3_PP.0.001	0.9645	0.2689	2.6 [1.5; 4.4]	0.00106866	130	+++?+??+	0.347	0.965378
ENSG00000153721	CNKSR3	6	154406500	0.00299722	PTV_missense_REVEL_PP.1e-05	0.9853	0.2743	2.7 [1.6; 4.6]	0.000354192	139	'+++?+???	0.676	0.00282967	PTV_missense_REVEL_PP.1e-05	0.9853	0.2743	2.7 [1.6; 4.6]	0.000354192	139	+++?+???	0.676	0.00265673	PTV.0.001	0.6358	0.2089	1.9 [1.3; 2.8]	0.00225372	252	+++?+???	0.541	0.490719	missense_3_PP.0.001	0.3996	0.3521	1.5 [0.7; 3]	0.2564	94	+?+?+???	0.9641	0.0238735	PTV_missense_popEVE_PP.1e-05	1.3954	0.424	4 [1.8; 9.3]	0.00111501	36	++??????	0.864	0.0233897
ENSG00000144747	TMF1	3	69023250	0.00308692	PTVnoflag_missense_3_PP.1e-05	0.7085	0.207	2 [1.4; 3]	0.000615045	271	'+++?+???	0.889	0.00302591	PTVnoflag_missense_3_PP.1e-05	0.7085	0.207	2 [1.4; 3]	0.000615045	271	+++?+???	0.889	0.00213923	PTVnoflag.0.001	0.6106	0.1982	1.8 [1.2; 2.7]	0.00185187	301	+++-+???	0.2427	0.149297	missense_any_PP.1e-05	0.3387	0.1738	1.4 [1; 2]	0.05132	415	++-?-+?+	0.282	0.0194454	PTV_missense_3_PP.0.001	0.5681	0.2003	1.8 [1.2; 2.6]	0.00521038	226	+++?+--+	0.7316	0.0431607
ENSG00000119403	PHF19	9	120858000	0.0030878	PTV_missense_popEVE_PP.0.001	1.1444	0.3158	3.1 [1.7; 5.8]	0.000683484	74	'+-+?????	0.1178	0.00300532	PTV_missense_popEVE_PP.0.001	1.1444	0.3158	3.1 [1.7; 5.8]	0.000683484	74	+-+?????	0.1178	0.00220052	PTV.0.001	1.1142	0.3469	3 [1.5; 6]	0.00220052	65	++-?????	0.2913	0.195352	missense_PAI3D_PP.1e-05	0.551	0.3137	1.7 [0.9; 3.2]	0.07904	135	++-?+???	0.5127	0.0183429	PTV_missense_REVEL_PP.1e-05	1.2297	0.3845	3.4 [1.6; 7.3]	0.00182138	40	+-?+????	0.4088	0.0461701
ENSG00000180116	C12orf40	12	3.96312e+07	0.00310051	PTVnoflag_missense_3_PP.0.01	0.7893	0.2038	2.2 [1.5; 3.3]	0.000548078	278	'+++-++??	0.1564	0.00517558	PTVnoflag_missense_3_PP.1e-05	1.0606	0.2895	2.9 [1.6; 5.1]	0.0013569	129	-++?++??	0.05272	0.00169646	PTVnoflag.0.01	0.7893	0.2038	2.2 [1.5; 3.3]	0.000548078	278	+++-++??	0.1564	0.276245	missense_AlphaMissense_PP.0.001	-0.2452	0.1953	0.8 [0.5; 1.1]	0.2093	356	--+?+???	0.7206	0.0187886	PTV_missense_3_PP.0.01	0.402	0.1467	1.5 [1.1; 2]	0.004238	457	++++++-?	0.1055	0.0208411
ENSG00000179532	DNHD1	11	6.49961e+06	0.0031105	PTVnoflag_missense_PAI3D_PP.0.01	0.0942	0.0265	1.1 [1; 1.2]	0.000227124	19873	'++++++-+	0.1791	0.012251	PTVnoflag_missense_PAI3D_PP.0.001	0.1169	0.0406	1.1 [1; 1.2]	0.00275963	8087	++++++-+	0.1668	0.00258479	PTVnoflag.0.01	0.0865	0.0271	1.1 [1; 1.1]	0.000863287	18719	++++++--	0.2516	0.541675	missense_PAI3D_PP.0.01	0.2254	0.1178	1.3 [1; 1.6]	0.05571	1189	++??+--+	0.2243	0.0461651	PTV_missense_any_PP.0.01	0.0923	0.0324	1.1 [1; 1.2]	0.00383069	10159	++++++--	0.1362	0.0332857
ENSG00000171206	TRIM8	10	102645000	0.00312802	PTV.0.001	1.9283	0.5203	6.9 [2.5; 19.1]	0.0011258	28	'+?+?????	0.8408	0.0031755	PTV.0.001	1.9283	0.5203	6.9 [2.5; 19.1]	0.0011258	28	+?+?????	0.8408	0.0011258	PTV.0.001	1.9283	0.5203	6.9 [2.5; 19.1]	0.0011258	28	+?+?????	0.8408	0.295046	missense_any_PP.1e-05	0.26	0.1979	1.3 [0.9; 1.9]	0.1888	271	++-?-+??	0.4292	0.89684	missense_any_PP.1e-05	0.437	0.2651	1.5 [0.9; 2.6]	0.0993	109	+++??+??	0.8673	0.0717657
ENSG00000113273	ARSB	5	78780500	0.00316269	PTVnoflag_missense_REVEL_PP.1e-05	-0.4893	0.124	0.6 [0.5; 0.8]	7.39208e-05	832	'--------	0.6412	0.0021141	PTVnoflag_missense_REVEL_PP.1e-05	-0.4893	0.124	0.6 [0.5; 0.8]	7.39208e-05	832	--------	0.6412	0.221346	PTVnoflag.1e-05	-0.36	0.2424	0.7 [0.4; 1.1]	0.1374	200	-+---???	0.8109	0.00524607	missense_REVEL_PP.1e-05	-0.5059	0.1443	0.6 [0.5; 0.8]	0.000395756	626	--------	0.9002	0.0325676	PTV_missense_REVEL_PP.1e-05	-0.5453	0.1654	0.6 [0.4; 0.8]	0.000895283	381	--------	0.8614	0.247271
ENSG00000040608	RTN4R	22	20242150	0.00320347	PTVnoflag_missense_AlphaMissense_PP.0.001	0.722	0.2084	2.1 [1.4; 3.1]	0.00205204	221	'+-+?+???	0.3992	0.00398847	PTVnoflag_missense_AlphaMissense_PP.0.001	0.722	0.2084	2.1 [1.4; 3.1]	0.00205204	221	+-+?+???	0.3992	NA	NA	NA	NA	NA	NA	NA	NA	NA	0.00331755	missense_AlphaMissense_PP.0.001	0.7431	0.2168	2.1 [1.4; 3.2]	0.00238324	201	+-+?+???	0.4155	0.0972974	PTV_missense_AlphaMissense_PP.0.001	0.5235	0.2762	1.7 [1; 2.9]	0.05803	100	+-+?????	0.1526	0.00246592
ENSG00000117984	CTSD	11	1753558	0.00323628	PTV_missense_popEVE_PP.1e-05	1.1534	0.3152	3.2 [1.7; 5.9]	0.000979743	100	'+++++???	0.01089	0.00282391	PTV_missense_popEVE_PP.1e-05	1.1534	0.3152	3.2 [1.7; 5.9]	0.000979743	100	+++++???	0.01089	0.00168266	PTV.1e-05	1.1534	0.3152	3.2 [1.7; 5.9]	0.000979743	100	+++++???	0.01089	0.141135	missense_PAI3D_PP.1e-05	0.545	0.3267	1.7 [0.9; 3.3]	0.09523	115	++-?+???	0.5028	0.316192	PTV_missense_3_PP.0.001	0.627	0.2846	1.9 [1.1; 3.3]	0.0389917	107	+++?+???	0.2039	0.0683142
ENSG00000129221	AIPL1	17	6.42659e+06	0.00325073	PTV_missense_any_PP.0.01	0.1038	0.0292	1.1 [1; 1.2]	0.000272978	14391	'+++++--+	0.08503	0.0195687	missense_PAI3D_PP.0.001	0.3323	0.1075	1.4 [1.1; 1.7]	0.00155826	1015	+++?++-+	0.8302	0.748853	PTV.0.001	0.098	0.1858	1.1 [0.8; 1.6]	0.598	363	+++--???	0.2556	0.00188204	missense_any_PP.0.01	0.1052	0.0296	1.1 [1; 1.2]	0.000290347	14025	++++++-+	0.1213	0.0092669	missense_any_PP.0.01	0.1269	0.0387	1.1 [1.1; 1.2]	0.00075959	6412	+++++--+	0.3084	0.264284
ENSG00000242366	UGT1A8	2	2.33618e+08	0.00325628	PTV_missense_3_PP.0.001	-0.4103	0.1325	0.7 [0.5; 0.9]	0.00102643	720	'------??	0.683	0.00426991	PTV_missense_3_PP.0.001	-0.4103	0.1325	0.7 [0.5; 0.9]	0.00102643	720	------??	0.683	0.00166192	PTV.0.001	-0.4114	0.1338	0.7 [0.5; 0.9]	0.00111538	705	------??	0.6806	0.799862	missense_REVEL_PP.1e-05	-0.2321	0.2255	0.8 [0.5; 1.2]	0.3032	231	--+--++?	0.4754	0.062205	PTV_missense_PAI3D_PP.0.001	-0.4088	0.1774	0.7 [0.5; 0.9]	0.0154952	311	-----???	0.6196	0.125535
ENSG00000130037	KCNA5	12	5044300	0.00326745	PTV_missense_REVEL_PP.1e-05	0.4961	0.1324	1.6 [1.3; 2.1]	0.000157529	652	'++-++++-	0.5572	0.00243849	PTV_missense_REVEL_PP.1e-05	0.4961	0.1324	1.6 [1.3; 2.1]	0.000157529	652	++-++++-	0.5572	0.453047	PTV.1e-05	0.4704	0.3278	1.6 [0.8; 3]	0.1512	125	+++?+???	0.5157	0.0035044	missense_REVEL_PP.1e-05	0.4808	0.146	1.6 [1.2; 2.2]	0.00118146	512	++-++-?-	0.4174	0.0178972	PTVnoflag_missense_any_PP.0.001	0.2424	0.0866	1.3 [1.1; 1.5]	0.00478835	1276	+++++-++	0.8801	0.0129267
ENSG00000175463	TBC1D10C	11	6.74043e+07	0.00328566	PTV_missense_popEVE_PP.0.001	0.4401	0.127	1.6 [1.2; 2]	0.000740332	772	'++++++??	0.3769	0.00438853	PTV_missense_popEVE_PP.0.001	0.4401	0.127	1.6 [1.2; 2]	0.000740332	772	++++++??	0.3769	0.00152983	PTV.0.001	0.4401	0.127	1.6 [1.2; 2]	0.000740332	772	++++++??	0.3769	0.301548	missense_PAI3D_PP.1e-05	-0.5232	0.4447	0.6 [0.2; 1.4]	0.2394	60	---?????	0.5175	0.110763	PTV_missense_3_PP.0.001	0.3449	0.1679	1.4 [1; 2]	0.0409137	350	++++++??	0.8093	0.0132247
ENSG00000197321	SVIL	10	29462000	0.00336476	PTV_missense_any_PP.1e-05	0.359	0.0959	1.4 [1.2; 1.7]	0.000197033	1391	'++?++++-	0.4925	0.00237075	PTV_missense_any_PP.1e-05	0.359	0.0959	1.4 [1.2; 1.7]	0.000197033	1391	++?++++-	0.4925	0.0074468	PTV.1e-05	0.6146	0.1824	1.8 [1.3; 2.6]	0.00229118	327	++?++???	0.5075	0.0176873	missense_3_PP.0.001	0.8632	0.3207	2.4 [1.3; 4.4]	0.00924367	119	+???+???	0.622	0.0691253	PTVnoflag_missense_popEVE_PP.1e-05	0.605	0.2498	1.8 [1.1; 3]	0.027409	151	+-?++?+?	0.7268	0.00525058
ENSG00000204389	HSPA1A	6	3.18158e+07	0.00336695	PTV_missense_3_PP.0.001	0.3964	0.1281	1.5 [1.2; 1.9]	0.00157737	734	'++??-???	0.3448	0.00356647	PTV_missense_3_PP.0.001	0.3964	0.1281	1.5 [1.2; 1.9]	0.00157737	734	++??-???	0.3448	0.00157737	PTV.0.001	0.3964	0.1281	1.5 [1.2; 1.9]	0.00157737	734	++??-???	0.3448	0.288414	missense_any_PP.1e-05	0.3	0.2409	1.3 [0.8; 2.2]	0.2129	222	+?-?????	0.3564	0.0320671	PTV_missense_PAI3D_PP.0.001	0.3345	0.1262	1.4 [1.1; 1.8]	0.00639797	593	+++?-???	0.5259	0.642094
ENSG00000167191	GPRC5B	16	1.98629e+07	0.00345432	PTV_missense_PAI3D_PP.0.001	0.5471	0.1327	1.7 [1.3; 2.2]	0.000148003	603	'+-+++-+?	0.05575	0.00456685	PTV_missense_PAI3D_PP.0.001	0.5471	0.1327	1.7 [1.3; 2.2]	0.000148003	603	+-+++-+?	0.05575	0.0144118	PTV.0.001	0.8456	0.2815	2.3 [1.3; 4]	0.0100044	112	+--++???	0.0641	0.0301548	missense_PAI3D_PP.0.001	0.4762	0.1552	1.6 [1.2; 2.2]	0.00364608	470	+-+?+???	0.332	0.022726	PTV_missense_PAI3D_PP.0.001	0.5623	0.1772	1.8 [1.2; 2.5]	0.00387565	268	+-+?-?+?	0.05936	0.0689745
ENSG00000188167	TMPPE	3	33092800	0.00345794	missense_AlphaMissense_PP.0.001	-0.6436	0.18	0.5 [0.4; 0.7]	0.000267869	425	'---?-+??	0.4894	0.0043754	missense_AlphaMissense_PP.0.001	-0.6436	0.18	0.5 [0.4; 0.7]	0.000267869	425	---?-+??	0.4894	0.115053	PTV.0.001	0.5929	0.3602	1.8 [0.9; 3.7]	0.09979	109	+++++???	0.4231	0.00118254	missense_AlphaMissense_PP.0.001	-0.6436	0.18	0.5 [0.4; 0.7]	0.000267869	425	---?-+??	0.4894	0.00760947	missense_AlphaMissense_PP.0.001	-0.8567	0.2536	0.4 [0.3; 0.7]	0.000520817	194	---?-??+	0.7459	0.035843
ENSG00000187066	TMEM262	11	65088500	0.00354889	PTV_missense_3_PP.0.001	1.4131	0.4284	4.1 [1.8; 9.5]	0.00185393	56	'+???+???	0.3712	0.00371784	PTV_missense_3_PP.0.001	1.4131	0.4284	4.1 [1.8; 9.5]	0.00185393	56	+???+???	0.3712	0.00185393	PTV.0.001	1.4131	0.4284	4.1 [1.8; 9.5]	0.00185393	56	+???+???	0.3712	0.6417	missense_AlphaMissense_PP.0.001	-0.0769	0.1653	0.9 [0.7; 1.3]	0.6417	452	++-?--??	0.2167	0.858021	PTV_missense_AlphaMissense_PP.0.001	0.0678	0.2108	1.1 [0.7; 1.6]	0.7477	217	++-?-???	0.1846	0.986175
ENSG00000068354__females	TBC1D25	23	48542400	0.00357272	PTV_missense_popEVE_PP.0.001	1.4555	0.3717	4.3 [2.1; 8.9]	0.000336513	51	'+?+?????	0.4899	0.00451966	PTV_missense_popEVE_PP.0.001	1.4555	0.3717	4.3 [2.1; 8.9]	0.000336513	51	+?+?????	0.4899	NA	NA	NA	NA	NA	NA	NA	NA	NA	0.446854	missense_PAI3D_PP.0.001	0.5911	0.4286	1.8 [0.8; 4.2]	0.1679	87	++??+???	0.5123	NA	NA	NA	NA	NA	NA	NA	NA	NA	NA
ENSG00000119640	ACYP1	14	7.50537e+07	0.00358094	missense_AlphaMissense_PP.1e-05	1.7982	0.4701	6 [2.4; 15.2]	0.000370202	41	'+++?????	0.4968	0.00247295	missense_AlphaMissense_PP.1e-05	1.7982	0.4701	6 [2.4; 15.2]	0.000370202	41	+++?????	0.4968	0.8083	PTV.0.001	0.1946	0.8023	1.2 [0.3; 5.9]	0.8083	36	-?+?????	0.6069	0.00131466	missense_AlphaMissense_PP.1e-05	1.7982	0.4701	6 [2.4; 15.2]	0.000370202	41	+++?????	0.4968	0.18299	missense_AlphaMissense_PP.0.001	0.9063	0.553	2.5 [0.8; 7.3]	0.1012	31	++??????	0.9209	0.0150803
ENSG00000171100__males	MTM1	23	150605500	0.00372012	missense_PAI3D_PP.1e-05	1.7208	0.4555	5.6 [2.3; 13.6]	0.000188999	34	'++??????	0.6897	0.00261997	missense_PAI3D_PP.1e-05	1.7208	0.4555	5.6 [2.3; 13.6]	0.000188999	34	++??????	0.6897	NA	NA	NA	NA	NA	NA	NA	NA	NA	0.00214352	missense_PAI3D_PP.1e-05	1.7208	0.4555	5.6 [2.3; 13.6]	0.000188999	34	++??????	0.6897	NA	NA	NA	NA	NA	NA	NA	NA	NA	NA
ENSG00000106415	GLCCI1	7	8.02742e+06	0.00373513	missense_any_PP.1e-05	-0.7445	0.214	0.5 [0.3; 0.7]	0.000613247	364	'---?-?--	0.993	0.00340178	missense_any_PP.1e-05	-0.7445	0.214	0.5 [0.3; 0.7]	0.000613247	364	---?-?--	0.993	0.932698	PTV.0.001	-0.0218	0.2158	1 [0.6; 1.5]	0.9195	267	--+-+???	0.9522	0.00141583	missense_any_PP.1e-05	-0.7445	0.214	0.5 [0.3; 0.7]	0.000613247	364	---?-?--	0.993	0.241177	missense_any_PP.0.001	-0.4166	0.1765	0.7 [0.5; 0.9]	0.0155581	374	--+?----	0.5474	0.0798765
ENSG00000151948	GLT1D1	12	128862500	0.00378822	PTVnoflag_missense_AlphaMissense_PP.0.001	0.3366	0.0982	1.4 [1.2; 1.7]	0.000596639	1291	'+++-++++	0.6704	0.00475711	PTVnoflag_missense_AlphaMissense_PP.0.001	0.3366	0.0982	1.4 [1.2; 1.7]	0.000596639	1291	+++-++++	0.6704	0.00610329	PTV.0.001	0.3941	0.1391	1.5 [1.1; 1.9]	0.00408103	595	+++-++??	0.1475	0.0749599	missense_3_PP.0.001	1.484	0.6231	4.4 [1.3; 15]	0.0237066	46	++??+???	0.707	0.00208657	PTV_missense_any_PP.0.001	0.4673	0.125	1.6 [1.2; 2]	0.00019966	608	++++++++	0.7094	0.24701
ENSG00000164109	MAD2L1	4	1.2006e+08	0.00379405	missense_REVEL_PP.0.001	1.0164	0.2804	2.8 [1.6; 4.8]	0.000397861	112	'+++?????	0.1662	0.00389787	missense_REVEL_PP.0.001	1.0164	0.2804	2.8 [1.6; 4.8]	0.000397861	112	+++?????	0.1662	0.149211	PTV.0.001	-0.6288	0.4154	0.5 [0.2; 1.2]	0.1302	67	--?-????	0.8707	0.00128765	missense_REVEL_PP.0.001	1.0164	0.2804	2.8 [1.6; 4.8]	0.000397861	112	+++?????	0.1662	0.00439625	missense_AlphaMissense_PP.1e-05	1.186	0.3426	3.3 [1.7; 6.4]	0.000411793	57	++??????	0.2369	0.138954
ENSG00000100307	CBX7	22	39134200	0.00381106	PTVnoflag.1e-05	1.7246	0.4855	5.6 [2.2; 14.5]	0.000365072	31	'++??????	0.6609	0.00252841	PTVnoflag.1e-05	1.7246	0.4855	5.6 [2.2; 14.5]	0.000365072	31	++??????	0.6609	0.00143112	PTVnoflag.1e-05	1.7246	0.4855	5.6 [2.2; 14.5]	0.000365072	31	++??????	0.6609	0.912716	missense_any_PP.1e-05	0.1791	0.3851	1.2 [0.6; 2.5]	0.6418	90	++-?????	0.6768	0.000323096	PTV_missense_AlphaMissense_PP.1e-05	1.6234	0.3761	5.1 [2.4; 10.6]	1.13709e-05	46	++??????	0.06094	0.0224734
ENSG00000142798	HSPG2	1	21824125	0.00382467	PTVnoflag_missense_popEVE_PP.0.01	-0.315	0.0969	0.7 [0.6; 0.9]	0.000781659	1584	'----+---	0.5292	0.00512765	PTVnoflag_missense_popEVE_PP.0.001	-0.3219	0.1005	0.7 [0.6; 0.9]	0.00085905	1443	----+---	0.4207	0.00170715	PTVnoflag.0.01	-0.315	0.0969	0.7 [0.6; 0.9]	0.000781659	1584	----+---	0.5292	0.369836	missense_REVEL_PP.0.001	-0.0928	0.0535	0.9 [0.8; 1]	0.08306	4699	-++----+	0.04445	0.71407	PTVnoflag_missense_popEVE_PP.0.01	-0.2243	0.1198	0.8 [0.6; 1]	0.06122	708	--+++---	0.3983	0.00283035
ENSG00000181965	NEUROG1	5	135535000	0.00385471	PTVnoflag_missense_AlphaMissense_PP.0.01	-0.4997	0.1403	0.6 [0.5; 0.8]	0.000385148	1227	'---?----	0.977	0.159605	PTVnoflag_missense_AlphaMissense_PP.0.001	-0.4385	0.2107	0.6 [0.4; 1]	0.0312526	397	---?++?-	0.5307	NA	NA	NA	NA	NA	NA	NA	NA	NA	0.00329846	missense_AlphaMissense_PP.0.01	-0.4997	0.1403	0.6 [0.5; 0.8]	0.000385148	1227	---?----	0.977	0.176162	PTVnoflag_missense_any_PP.0.01	-0.4353	0.1912	0.6 [0.4; 0.9]	0.0183106	526	---?-++-	0.8179	0.0293259
ENSG00000185467	KPNA7	7	99174750	0.00390365	PTVnoflag_missense_REVEL_PP.0.01	-0.3268	0.0853	0.7 [0.6; 0.9]	8.53881e-05	2149	'--------	0.7267	0.0232797	PTVnoflag_missense_REVEL_PP.0.001	-0.2986	0.0898	0.7 [0.6; 0.9]	0.000536499	1697	---+----	0.6945	0.137913	PTVnoflag.0.001	-0.2276	0.1159	0.8 [0.6; 1]	0.0364068	1023	---+--++	0.3803	0.00294904	missense_REVEL_PP.0.01	-0.4787	0.1273	0.6 [0.5; 0.8]	0.000208849	1035	--------	0.9189	0.0543502	PTVnoflag_missense_3_PP.0.001	-0.351	0.1471	0.7 [0.5; 0.9]	0.00623168	518	---+---?	0.09051	0.146231
ENSG00000136574	GATA4	8	1.17269e+07	0.00391534	PTV_missense_REVEL_PP.1e-05	0.6297	0.1601	1.9 [1.4; 2.6]	0.000215918	450	'+++++++?	0.04253	0.00270894	PTV_missense_REVEL_PP.1e-05	0.6297	0.1601	1.9 [1.4; 2.6]	0.000215918	450	+++++++?	0.04253	NA	NA	NA	NA	NA	NA	NA	NA	NA	0.00865716	missense_REVEL_PP.1e-05	0.5703	0.1648	1.8 [1.3; 2.4]	0.00102918	414	++++-+??	0.04122	0.535889	PTVnoflag_missense_AlphaMissense_PP.1e-05	0.5714	0.2403	1.8 [1.1; 2.8]	0.0272092	164	+++?+?+?	0.2347	0.00249196
ENSG00000140416	TPM1	15	63043000	0.003927	PTV_missense_PAI3D_PP.1e-05	0.8693	0.2515	2.4 [1.5; 3.9]	0.000546915	161	'++?++???	0.7961	0.00395609	PTV_missense_PAI3D_PP.1e-05	0.8693	0.2515	2.4 [1.5; 3.9]	0.000546915	161	++?++???	0.7961	0.0902	PTV.0.001	0.7509	0.4432	2.1 [0.9; 5.1]	0.0902	52	++?+????	0.8297	0.0212659	missense_PAI3D_PP.1e-05	0.9663	0.3398	2.6 [1.4; 5.1]	0.00414151	83	++??????	0.5429	0.00826817	PTV_missense_PAI3D_PP.1e-05	1.1201	0.3406	3.1 [1.6; 6]	0.00106597	65	++????-?	0.2624	0.757342
ENSG00000120457	KCNJ5	11	128911250	0.0039727	PTV_missense_3_PP.0.001	-0.3576	0.1061	0.7 [0.6; 0.9]	0.000680582	1307	'-----+--	0.9302	0.00527086	PTV_missense_3_PP.0.001	-0.3576	0.1061	0.7 [0.6; 0.9]	0.000680582	1307	-----+--	0.9302	0.6366	PTV.0.001	-0.1999	0.4231	0.8 [0.4; 1.9]	0.6366	65	--?-????	0.7777	0.00269564	missense_3_PP.0.001	-0.3683	0.1101	0.7 [0.6; 0.9]	0.00078957	1230	---?-+--	0.8483	0.0116489	PTV_missense_AlphaMissense_PP.0.001	-0.3704	0.1215	0.7 [0.5; 0.9]	0.0032873	704	---?----	0.8697	0.160133
ENSG00000137675	MMP27	11	102692000	0.00402042	PTV_missense_popEVE_PP.1e-05	0.89	0.241	2.4 [1.5; 3.9]	0.000355686	176	'++-+++??	0.4423	0.00277301	PTV_missense_popEVE_PP.1e-05	0.89	0.241	2.4 [1.5; 3.9]	0.000355686	176	++-+++??	0.4423	0.00167615	PTV.1e-05	0.89	0.241	2.4 [1.5; 3.9]	0.000355686	176	++-+++??	0.4423	0.153354	missense_3_PP.0.001	-0.9605	0.4613	0.4 [0.2; 0.9]	0.038732	108	--+?-???	0.7205	0.061723	PTVnoflag_missense_popEVE_PP.1e-05	1.121	0.3977	3.1 [1.4; 6.7]	0.00739139	58	++???++?	0.5855	0.0023624
ENSG00000131080__females	EDA2R	23	66600125	0.00404715	PTVnoflag_missense_any_PP.0.01	0.1387	0.0366	1.1 [1.1; 1.2]	0.000295783	12347	'++++++-+	0.06647	0.240477	PTVnoflag_missense_any_PP.0.001	0.3172	0.201	1.4 [0.9; 2]	0.1146	435	++-+++??	0.4538	0.206548	PTVnoflag.0.001	0.3383	0.2674	1.4 [0.8; 2.4]	0.2059	229	++-++???	0.3462	0.00241636	missense_any_PP.0.01	0.1365	0.037	1.1 [1.1; 1.2]	0.000458807	12113	++++++-+	0.03891	NA	NA	NA	NA	NA	NA	NA	NA	NA	NA
ENSG00000203814	H2BC18	1	149812000	0.00405578	PTVnoflag_missense_REVEL_PP.0.001	2.0026	0.5778	7.4 [2.4; 23]	0.00232261	29	'+?+?????	0.4618	0.00414752	PTVnoflag_missense_REVEL_PP.0.001	2.0026	0.5778	7.4 [2.4; 23]	0.00232261	29	+?+?????	0.4618	0.00309494	PTV.0.001	1.3261	0.3989	3.8 [1.7; 8.2]	0.00309494	65	+?++????	0.05871	NA	NA	NA	NA	NA	NA	NA	NA	NA	0.381463	PTV_missense_AlphaMissense_PP.0.001	0.493	0.3011	1.6 [0.9; 3]	0.1016	88	+??-????	0.3608	0.936997
ENSG00000166949	SMAD3	15	6.70662e+07	0.00406586	PTV_missense_REVEL_PP.0.001	0.5264	0.1521	1.7 [1.3; 2.3]	0.000752531	511	'+++-+?+?	0.4093	0.00497592	PTV_missense_REVEL_PP.0.001	0.5264	0.1521	1.7 [1.3; 2.3]	0.000752531	511	+++-+?+?	0.4093	NA	NA	NA	NA	NA	NA	NA	NA	NA	0.00765063	missense_REVEL_PP.0.001	0.4992	0.1588	1.6 [1.2; 2.2]	0.00220796	472	+++-+?+?	0.5763	0.0287432	PTV_missense_REVEL_PP.0.001	0.5718	0.1968	1.8 [1.2; 2.6]	0.00752659	238	+++++++?	0.946	0.0587389
ENSG00000165801	ARHGEF40	14	21073000	0.0040962	PTVnoflag_missense_any_PP.0.001	0.1995	0.0541	1.2 [1.1; 1.4]	0.000292531	4314	'++++++++	0.2721	0.0044267	PTVnoflag_missense_any_PP.0.001	0.1995	0.0541	1.2 [1.1; 1.4]	0.000292531	4314	++++++++	0.2721	0.0793248	PTVnoflag.0.001	0.2829	0.1328	1.3 [1; 1.7]	0.0459688	771	+++++++?	0.7585	0.00603514	missense_any_PP.0.001	0.1849	0.0593	1.2 [1.1; 1.4]	0.00214908	3544	+++?++++	0.2338	0.00355722	PTVnoflag_missense_any_PP.0.001	0.2566	0.0682	1.3 [1.1; 1.5]	0.000238668	2023	++++++++	0.5368	0.254135
ENSG00000236396	SLC35G4	18	11609900	0.00415572	PTVnoflag_missense_AlphaMissense_PP.0.001	1.4917	0.4104	4.4 [2; 9.9]	0.00128808	64	'+?+?????	0.3509	0.0033769	PTVnoflag_missense_AlphaMissense_PP.0.001	1.4917	0.4104	4.4 [2; 9.9]	0.00128808	64	+?+?????	0.3509	0.486997	PTV.0.001	0.1281	0.1374	1.1 [0.9; 1.5]	0.3513	735	-++++???	0.5066	0.0016404	missense_AlphaMissense_PP.0.001	1.4917	0.4104	4.4 [2; 9.9]	0.00128808	64	+?+?????	0.3509	0.0333185	PTVnoflag_missense_AlphaMissense_PP.0.01	1.0494	0.4042	2.9 [1.3; 6.3]	0.0134357	72	+?+?????	0.4428	0.116005
ENSG00000066230	SLC9A3	5	474338	0.00415668	PTVnoflag_missense_PAI3D_PP.1e-05	-0.6926	0.1877	0.5 [0.3; 0.7]	0.000142636	413	'---+-?-?	0.6365	0.00347165	PTVnoflag_missense_PAI3D_PP.1e-05	-0.6926	0.1877	0.5 [0.3; 0.7]	0.000142636	413	---+-?-?	0.6365	0.00584218	PTVnoflag.0.001	-0.6348	0.2226	0.5 [0.3; 0.8]	0.00402912	283	---+-???	0.8556	0.0521782	missense_PAI3D_PP.1e-05	-0.6316	0.2517	0.5 [0.3; 0.9]	0.0103011	233	---?+???	0.677	0.0147485	PTVnoflag_missense_PAI3D_PP.0.001	-0.4852	0.1534	0.6 [0.5; 0.8]	0.00118341	466	---+-+--	0.6123	0.147113
ENSG00000120913	PDLIM2	8	22579000	0.00417696	PTVnoflag_missense_3_PP.0.001	0.6845	0.1898	2 [1.4; 2.9]	0.000340842	322	'+++++???	0.6619	0.00470103	PTVnoflag_missense_3_PP.0.001	0.6845	0.1898	2 [1.4; 2.9]	0.000340842	322	+++++???	0.6619	0.00297637	PTVnoflag.0.001	0.6804	0.2036	2 [1.3; 2.9]	0.0015803	251	+++++???	0.4897	0.263979	missense_REVEL_PP.0.001	0.3282	0.1916	1.4 [1; 2]	0.08672	360	+--+-???	0.09993	0.019547	PTVnoflag_missense_3_PP.0.001	0.7122	0.2474	2 [1.3; 3.3]	0.00399419	143	+++?+??+	0.4953	0.297456
ENSG00000182606	TRAK1	3	42091500	0.00419629	PTV_missense_3_PP.0.001	0.6484	0.171	1.9 [1.4; 2.7]	0.000276495	354	'++-++?-?	0.006434	0.00539818	PTV_missense_3_PP.0.001	0.6484	0.171	1.9 [1.4; 2.7]	0.000276495	354	++-++?-?	0.006434	0.00689361	PTV.0.001	0.5815	0.2007	1.8 [1.2; 2.7]	0.00431871	272	++-++???	0.01655	0.00827343	missense_3_PP.0.001	1.1747	0.3421	3.2 [1.7; 6.3]	0.00153948	67	+-??+???	0.4905	0.838727	PTVnoflag_missense_AlphaMissense_PP.1e-05	0.3197	0.1638	1.4 [1; 1.9]	0.05091	344	++-?++-+	0.4839	0.00220029
ENSG00000135424	ITGA7	12	55685125	0.00420562	PTVnoflag_missense_3_PP.0.001	0.2493	0.0707	1.3 [1.1; 1.5]	0.00057006	2346	'+++-+++-	0.5844	0.00552562	PTVnoflag_missense_3_PP.0.001	0.2493	0.0707	1.3 [1.1; 1.5]	0.00057006	2346	+++-+++-	0.5844	0.00419601	PTVnoflag.0.001	0.2588	0.0819	1.3 [1.1; 1.5]	0.00282281	1627	+++-++--	0.5277	0.222724	missense_3_PP.0.001	0.2405	0.1368	1.3 [1; 1.7]	0.07863	723	++??-++-	0.2404	0.423543	PTVnoflag_missense_3_PP.0.001	0.1959	0.0913	1.2 [1; 1.5]	0.0318384	1117	+++--++-	0.5295	0.00954238
ENSG00000242715	CCDC169	13	36251750	0.00420697	missense_AlphaMissense_PP.0.001	1.1454	0.3204	3.1 [1.7; 5.9]	0.00143643	95	'+++?+???	0.5795	0.00421697	missense_AlphaMissense_PP.0.001	1.1454	0.3204	3.1 [1.7; 5.9]	0.00143643	95	+++?+???	0.5795	0.39932	PTV.1e-05	0.6226	0.4137	1.9 [0.8; 4.2]	0.1324	72	+++?????	0.9368	0.00143643	missense_AlphaMissense_PP.0.001	1.1454	0.3204	3.1 [1.7; 5.9]	0.00143643	95	+++?+???	0.5795	0.023824	PTV_missense_AlphaMissense_PP.1e-05	1.4234	0.5001	4.2 [1.6; 11.1]	0.00408635	23	++??????	0.5564	0.043237
ENSG00000170953	OR8B12	11	1.24543e+08	0.00421379	PTVnoflag_missense_AlphaMissense_PP.0.01	-0.247	0.0883	0.8 [0.7; 0.9]	0.00220149	1663	'---?+---	0.3104	0.0305844	PTVnoflag_missense_AlphaMissense_PP.0.001	-0.2004	0.1004	0.8 [0.7; 1]	0.0269836	1286	--+?+--?	0.265	NA	NA	NA	NA	NA	NA	NA	NA	NA	0.00407143	missense_AlphaMissense_PP.0.01	-0.247	0.0883	0.8 [0.7; 0.9]	0.00220149	1663	---?+---	0.3104	0.226295	PTVnoflag_missense_AlphaMissense_PP.0.001	-0.1485	0.12	0.9 [0.7; 1.1]	0.2158	702	+--?+--?	0.2108	0.00493261
ENSG00000105143	SLC1A6	19	14950200	0.00422601	PTV_missense_REVEL_PP.0.001	0.8659	0.2422	2.4 [1.5; 3.8]	0.000611426	166	'+++++???	0.5401	0.00446648	PTV_missense_REVEL_PP.0.001	0.8659	0.2422	2.4 [1.5; 3.8]	0.000611426	166	+++++???	0.5401	0.251994	PTV.0.001	0.5427	0.4022	1.7 [0.8; 3.8]	0.1773	69	-+-+????	0.02689	0.00463596	missense_REVEL_PP.1e-05	1.1288	0.3503	3.1 [1.6; 6.1]	0.00192377	61	+++?????	0.8501	0.0313431	PTV_missense_PAI3D_PP.1e-05	0.7256	0.2748	2.1 [1.2; 3.5]	0.00927804	116	++??+???	0.4329	0.206948
ENSG00000135426	TESPA1	12	54962250	0.00437606	PTV_missense_AlphaMissense_PP.0.001	0.2442	0.0688	1.3 [1.1; 1.5]	0.000518503	2603	'+++--+++	0.06102	0.00439829	PTV_missense_AlphaMissense_PP.0.001	0.2442	0.0688	1.3 [1.1; 1.5]	0.000518503	2603	+++--+++	0.06102	0.426373	PTV.0.001	0.1815	0.1428	1.2 [0.9; 1.6]	0.2037	642	+-+--+??	0.1767	0.00236659	missense_AlphaMissense_PP.0.001	0.2656	0.0787	1.3 [1.1; 1.5]	0.000586911	1954	+++?-+++	0.205	0.0863548	PTV_missense_AlphaMissense_PP.0.01	0.2434	0.0862	1.3 [1.1; 1.5]	0.0072145	1445	+++--+-+	0.2034	0.0357473
ENSG00000132763	MMACHC	1	45504750	0.00444603	PTV_missense_popEVE_PP.0.01	-0.2263	0.0702	0.8 [0.7; 0.9]	0.000639205	2581	'---++-++	0.09993	0.172417	missense_any_PP.1e-05	0.4347	0.2208	1.5 [1; 2.4]	0.0332816	268	++++-???	0.8187	0.00188545	PTV.0.01	-0.2263	0.0702	0.8 [0.7; 0.9]	0.000639205	2581	---++-++	0.09993	0.839154	missense_any_PP.1e-05	0.4347	0.2208	1.5 [1; 2.4]	0.0332816	268	++++-???	0.8187	0.593016	missense_REVEL_PP.1e-05	0.8663	0.3185	2.4 [1.3; 4.4]	0.0156721	98	+++???++	0.2805	0.00382416
ENSG00000113108	APBB3	5	140558750	0.00451686	PTV_missense_any_PP.0.001	-0.2864	0.0824	0.8 [0.6; 0.9]	0.000323934	2059	'---+----	0.1486	0.00477994	PTV_missense_any_PP.0.001	-0.2864	0.0824	0.8 [0.6; 0.9]	0.000323934	2059	---+----	0.1486	0.0881977	PTV.1e-05	-0.4668	0.2643	0.6 [0.4; 1.1]	0.07738	176	--+--???	0.5949	0.0139952	missense_any_PP.0.001	-0.2663	0.0972	0.8 [0.6; 0.9]	0.00391151	1491	--++----	0.2243	0.238645	PTV_missense_REVEL_PP.1e-05	-0.6359	0.3259	0.5 [0.3; 1]	0.051	102	---+??-?	0.767	0.00302122
ENSG00000104472	CHRAC1	8	140512250	0.00454065	missense_AlphaMissense_PP.1e-05	-1.361	0.3816	0.3 [0.1; 0.5]	0.000523303	118	'---?-???	0.7852	0.00303107	missense_AlphaMissense_PP.1e-05	-1.361	0.3816	0.3 [0.1; 0.5]	0.000523303	118	---?-???	0.7852	0.434351	PTV.1e-05	0.7709	0.7093	2.2 [0.5; 8.7]	0.2771	23	+?+?????	0.8845	0.00156389	missense_AlphaMissense_PP.1e-05	-1.361	0.3816	0.3 [0.1; 0.5]	0.000523303	118	---?-???	0.7852	0.0196227	PTV_missense_AlphaMissense_PP.1e-05	-1.2264	0.4518	0.3 [0.1; 0.7]	0.00582949	38	--??????	0.4336	0.444423
ENSG00000185305	ARL15	5	53943250	0.00459239	PTV_missense_popEVE_PP.0.001	1.1983	0.3648	3.3 [1.6; 6.8]	0.00119306	100	'+++?+???	0.146	0.00612575	PTV_missense_popEVE_PP.0.001	1.1983	0.3648	3.3 [1.6; 6.8]	0.00119306	100	+++?+???	0.146	0.00178918	PTV.0.001	1.1983	0.3648	3.3 [1.6; 6.8]	0.00119306	100	+++?+???	0.146	0.824844	missense_PAI3D_PP.1e-05	-0.6872	0.602	0.5 [0.2; 1.6]	0.2536	33	--??????	0.3368	0.974379	PTV_missense_any_PP.1e-05	0.71	0.352	2 [1; 4.1]	0.0312708	82	++??+?-?	0.4913	0.384352
ENSG00000141759	TXNL4A	18	7.99737e+07	0.00461623	missense_any_PP.0.001	-1.4054	0.4196	0.2 [0.1; 0.6]	0.000700696	100	'--??-???	0.5863	0.005733	missense_any_PP.0.001	-1.4054	0.4196	0.2 [0.1; 0.6]	0.000700696	100	--??-???	0.5863	0.543342	PTV.1e-05	-0.8585	0.7357	0.4 [0.1; 1.8]	0.2433	27	--??????	0.2814	0.00156549	missense_any_PP.0.001	-1.4054	0.4196	0.2 [0.1; 0.6]	0.000700696	100	--??-???	0.5863	0.0262585	PTV_missense_any_PP.0.001	-1.0284	0.4096	0.4 [0.2; 0.8]	0.0117986	54	--??????	0.649	0.110915
ENSG00000165029	ABCA1	9	104785375	0.00463547	PTVnoflag_missense_REVEL_PP.0.01	0.1203	0.0312	1.1 [1.1; 1.2]	0.000149701	12583	'+++-++++	0.8335	0.0142515	PTVnoflag_missense_PAI3D_PP.0.001	0.1519	0.0464	1.2 [1.1; 1.3]	0.000798493	5945	+++-++++	0.1049	0.0579644	PTVnoflag.0.001	0.243	0.1062	1.3 [1; 1.6]	0.0373018	1035	+++-+-??	0.05026	0.00547327	missense_REVEL_PP.0.01	0.1143	0.0326	1.1 [1.1; 1.2]	0.00053431	11577	++++++++	0.9263	0.0521046	PTVnoflag_missense_AlphaMissense_PP.0.001	0.1433	0.0536	1.2 [1; 1.3]	0.00630276	3308	+++--+--	0.3175	0.0671495
ENSG00000214967	NPIPA7	16	16387400	0.00475903	missense_any_PP.0.001	0.3798	0.1147	1.5 [1.2; 1.8]	0.000829526	973	'+??+????	0.4466	0.00300826	missense_any_PP.0.001	0.3798	0.1147	1.5 [1.2; 1.8]	0.000829526	973	+??+????	0.4466	0.7137	PTV.0.001	0.0783	0.2135	1.1 [0.7; 1.6]	0.7137	297	-??+????	0.184	0.00227987	missense_any_PP.0.001	0.3798	0.1147	1.5 [1.2; 1.8]	0.000829526	973	+??+????	0.4466	0.0268541	missense_any_PP.1e-05	0.9631	0.334	2.6 [1.4; 5]	0.00421263	65	+??+????	0.9795	0.0275614
ENSG00000039319	ZFYVE16	5	80437000	0.00484237	PTVnoflag_missense_popEVE_PP.0.001	0.5483	0.1606	1.7 [1.3; 2.4]	0.000827512	433	'+++++???	0.4825	0.00544097	PTVnoflag_missense_popEVE_PP.0.001	0.5483	0.1606	1.7 [1.3; 2.4]	0.000827512	433	+++++???	0.4825	0.00231546	PTVnoflag.0.001	0.5483	0.1606	1.7 [1.3; 2.4]	0.000827512	433	+++++???	0.4825	0.00879889	missense_any_PP.1e-05	-0.4783	0.1575	0.6 [0.5; 0.8]	0.00102254	527	---?++-+	0.06328	0.000665998	PTVnoflag_missense_popEVE_PP.0.001	0.8124	0.2071	2.3 [1.5; 3.4]	0.000155963	189	+++?-+??	0.5916	0.69869
ENSG00000273213	H3-7	1	143905500	0.00486054	PTV_missense_any_PP.0.01	-0.6324	0.18	0.5 [0.4; 0.8]	0.000297448	744	'-+?--???	0.4486	0.0142589	PTV_missense_any_PP.0.001	-0.5651	0.1795	0.6 [0.4; 0.8]	0.00123079	632	-+?--???	0.5345	0.2219	PTV.0.001	-0.413	0.3381	0.7 [0.3; 1.3]	0.2219	139	-??--???	0.4931	0.00359241	missense_any_PP.0.01	-0.678	0.2042	0.5 [0.3; 0.8]	0.000599181	605	-+?--???	0.5416	0.163087	PTVnoflag_missense_any_PP.0.01	-0.5362	0.2405	0.6 [0.4; 0.9]	0.0227151	277	-+?--???	0.7511	0.0124074
ENSG00000120279	MYCT1	6	152698000	0.00486239	PTV_missense_REVEL_PP.1e-05	1.6557	0.4221	5.2 [2.3; 12]	0.000181958	44	'++??????	0.3869	0.00297559	PTV_missense_REVEL_PP.1e-05	1.6557	0.4221	5.2 [2.3; 12]	0.000181958	44	++??????	0.3869	0.00297316	PTV.1e-05	1.5733	0.4371	4.8 [2; 11.4]	0.00059674	42	++??????	0.4376	0.752463	missense_any_PP.1e-05	0.5593	0.2776	1.7 [1; 3]	0.0944718	124	+-??+???	0.1871	0.199632	PTV_missense_3_PP.1e-05	1.5027	0.531	4.5 [1.6; 12.7]	0.00811579	26	++??????	0.559	0.268426
ENSG00000094631__females	HDAC6	23	48808000	0.00489475	missense_any_PP.0.001	0.7364	0.2018	2.1 [1.4; 3.1]	0.000638592	325	'+++?+???	0.9375	0.00437184	missense_any_PP.0.001	0.7364	0.2018	2.1 [1.4; 3.1]	0.000638592	325	+++?+???	0.9375	0.559502	PTV.0.001	0.3701	0.3799	1.4 [0.7; 3]	0.33	97	+++?????	0.6532	0.00262055	missense_any_PP.0.001	0.7364	0.2018	2.1 [1.4; 3.1]	0.000638592	325	+++?+???	0.9375	NA	NA	NA	NA	NA	NA	NA	NA	NA	NA
ENSG00000102271__males	KLHL4	23	8.75179e+07	0.00492887	PTVnoflag_missense_any_PP.1e-05	0.7336	0.1807	2.1 [1.5; 3]	0.000182675	222	'++-++++?	0.3	0.00335297	PTVnoflag_missense_any_PP.1e-05	0.7336	0.1807	2.1 [1.5; 3]	0.000182675	222	++-++++?	0.3	0.402066	PTVnoflag.0.001	0.4015	0.3744	1.5 [0.7; 3.1]	0.2836	69	-++?+???	0.6855	0.00347273	missense_any_PP.1e-05	0.7784	0.1978	2.2 [1.5; 3.2]	0.000314074	160	++++?++?	0.567	NA	NA	NA	NA	NA	NA	NA	NA	NA	NA
ENSG00000050405	LIMA1	12	50177750	0.00497204	PTVnoflag_missense_AlphaMissense_PP.0.001	-0.4234	0.1289	0.7 [0.5; 0.8]	0.000183831	944	'------++	0.01343	0.00370287	PTVnoflag_missense_AlphaMissense_PP.0.001	-0.4234	0.1289	0.7 [0.5; 0.8]	0.000183831	944	------++	0.01343	0.0441219	PTVnoflag.0.001	-0.4179	0.1798	0.7 [0.5; 0.9]	0.0162143	481	--+--?-?	0.3552	0.00716434	missense_AlphaMissense_PP.0.001	-0.5606	0.1902	0.6 [0.4; 0.8]	0.00131767	444	---?--?+	0.101	0.0388512	PTVnoflag_missense_AlphaMissense_PP.0.001	-0.4756	0.1709	0.6 [0.4; 0.9]	0.000641112	427	--+---++	0.008469	0.0888697
ENSG00000163399	ATP1A1	1	116379000	0.00498507	PTV.0.001	1.304	0.4002	3.7 [1.7; 8.1]	0.00136834	46	'+?+?????	0.1907	0.00560657	PTV.0.001	1.304	0.4002	3.7 [1.7; 8.1]	0.00136834	46	+?+?????	0.1907	0.00169245	PTV.0.001	1.304	0.4002	3.7 [1.7; 8.1]	0.00136834	46	+?+?????	0.1907	0.854208	missense_3_PP.1e-05	0.2679	0.2653	1.3 [0.8; 2.2]	0.3127	185	+-+?+???	0.3232	0.594985	PTV_missense_popEVE_PP.0.001	0.6658	0.3334	1.9 [1; 3.7]	0.0635668	68	+-+?????	0.0798	0.158979
Abbreviations: ID, identifier; CHROM, chromosom; GENPOS, basepair position on chromosome; SE, standard error; OR, odds ratio; cMAC, cumulative minor allele count; MAF, minor allele frequency; PTV, protein-truncating variant; EUR, European genetic ancestry
[truncated: 17 more columns]

## Sheet: ST4 Replication AoUv8
Supplementary Table 4: Replication results from separate samples from the All of Us Research Program
GENE ENSEMBL ID	GENE NAME	CHROM	GENPOS	Mask	All of Us Research Program							Genomics England 100,000 Genomes Program							META-ANALYSIS
					Beta	SE	OR	P-value	Direction consistent with discovery?	One-sided P-value	cMAC	Beta	SE	OR	P-value	Direction consistent with discovery?	One-sided P-value	cMAC	Beta	SE	OR	P-value	Direction consistent with discovery?	One-sided P-value	cMAC
ENSG00000155657	TTN	2	178527013	PTV_missense_3_PP.1e-05	0.480382	0.167608	1.62	0.00415556	YES	0.00207778	580	1.22918	0.232392	3.42	1.22826e-07	YES	6.1413e-08	262	0.736606	0.13594	2.09	6.00695e-08	YES	3.00347e-08	842
ENSG00000160789	LMNA	1	156114968	PTVnoflag_missense_REVEL_PP.1e-05	1.68775	0.394486	5.41	1.88e-05	YES	9.4e-06	63	1.31001	0.638778	3.71	0.0402856	YES	0.0201428	35	1.58346	0.33564	4.87	2.38493e-06	YES	1.19247e-06	98
ENSG00000057294	PKP2	12	32792493	PTV_missense_REVEL_PP.0.001	0.932067	0.250664	2.54	0.0002005	YES	0.00010025	209	0.730939	0.529779	2.08	0.167678	YES	0.0838388	109	0.895277	0.226582	2.45	7.77489e-05	YES	3.88744e-05	318
ENSG00000217128	FNIP1	5	131647198	PTV_missense_popEVE_PP.0.001	2.15293	0.572361	8.61	0.0001689	YES	8.445e-05	31	1.94468	1.73829	6.99	0.263254	YES	0.131627	16	2.13256	0.543649	8.44	8.75695e-05	YES	4.37848e-05	47
ENSG00000134571	MYBPC3	11	47331882	PTV_missense_popEVE_PP.0.001	0.684148	0.388438	1.98	0.0781916	YES	0.0390958	87	2.06066	0.523879	7.85	8.37279e-05	YES	4.18639e-05	57	1.17246	0.312024	3.23	0.000171562	YES	8.57811e-05	144
ENSG00000140986	RPL3L	16	1944844	PTV_missense_any_PP.0.01	0.198381	0.0772717	1.22	0.010249	YES	0.00512448	2928	0.256471	0.10044	1.29	0.0106657	YES	0.00533286	2555	0.219979	0.0612444	1.25	0.000328367	YES	0.000164183	5483
ENSG00000178209	PLEC	8	143916177	PTV_missense_3_PP.1e-05	0.826875	0.47956	2.29	0.0846642	YES	0.0423321	71	1.67688	0.686584	5.35	0.0145918	YES	0.00729592	30	1.10559	0.393153	3.02	0.00492181	YES	0.00246091	101
ENSG00000117139	KDM5B	1	202729044	PTVnoflag_missense_REVEL_PP.0.01	0.715129	0.271821	2.04	0.00851648	YES	0.00425824	190	0.317702	0.475035	1.37	0.503625	YES	0.251812	207	0.617098	0.235927	1.85	0.00890622	YES	0.00445311	397
ENSG00000159251	ACTC1	15	34790472	PTV_missense_AlphaMissense_PP.0.001	1.01564	0.474412	2.76	0.0322864	YES	0.0161432	60	1.40885	0.938272	4.09	0.133217	YES	0.0666087	35	1.0957	0.42337	2.99	0.00965245	YES	0.00482622	95
ENSG00000135063	FAM189A2	9	69325344	PTVnoflag_missense_PAI3D_PP.0.01	0.537466	0.209887	1.71	0.010445	YES	0.00522252	351	-0.331842	0.470563	0.72	0.480684	NO	0.759658	119	0.393218	0.191684	1.48	0.0402292	YES	0.0201146	470
ENSG00000183873	SCN5A	3	38550354	missense_AlphaMissense_PP.0.01	-0.256099	0.138451	0.77	0.0643502	YES	0.0321751	1162	0.0652494	0.198413	1.07	0.742265	NO	0.628867	772	-0.150868	0.113541	0.86	0.183929	YES	0.0919644	1934
ENSG00000166147	FBN1	15	48415604	PTV_missense_3_PP.1e-05	0.522447	0.41191	1.69	0.204672	YES	0.102336	104	0.259766	0.70657	1.3	0.713139	YES	0.356569	54	0.455818	0.355855	1.58	0.200226	YES	0.100113	158
ENSG00000183230	CTNNA3	10	65920379	PTV_missense_3_PP.0.001	0.318336	0.433832	1.37	0.463084	YES	0.231542	116	0.340583	0.608469	1.41	0.575657	YES	0.287829	90	0.325834	0.35324	1.39	0.356312	YES	0.178156	206
ENSG00000203867	RBM20	10	110644534	PTVnoflag_missense_3_PP.0.001	0.0739193	0.498309	1.08	0.882074	YES	0.441037	78	-0.886986	0.628116	0.41	0.157909	NO	0.921045	70	-0.297252	0.390379	0.74	0.446392	NO	0.776804	148
ENSG00000152518	ZFP36L2	2	43224462	PTV_missense_3_PP.0.001	NA	NA	NA	NA	NA	NA	<20	-1.21054	1.29082	0.3	0.348343	NO	0.825829	15	NA	NA	NA	NA	NA	NA	<20
Abbreviations: ID, identifier; CHROM, chromosom; GENPOS, basepair position on chromosome; SE, standard error; OR, odds ratio; cMAC, cumulative minor allele count; MAF, minor allele frequency; PTV, protein-truncating variant; EUR, European genetic ancestry
																							0.00357143

## Sheet: ST5 Effects across freq spectru
Supplementary Table 5: Common and low-frequency coding index variants curated from previous AF GWAS
Annotated gene	Chr	BP	RA_NRA	N AF	N Total	N Studies	Category	MAF	OR_minor	CI_lower	CI_upper	BETA_minor	SE
PERM1	1	983237	A/G	148092	1470890	51	GWAS common	0.161	1.05	1.03473	1.06549	0.0487902	0.00747255
CASZ1	1	10736809	C/T	154412	1510340	66	GWAS common	0.387	1.04	1.03075	1.04933	0.0392207	0.00455611
CLCN6	1	11821384	G/C	159440	1211820	66	GWAS common	0.15	1.04	1.0257	1.0545	0.0392207	0.00706392
ZBTB17	1	15951152	T/C	180063	1638590	67	GWAS common	0.212	1.04	1.0291	1.05101	0.0392207	0.00537516
CAPZB	1	19448088	A/G	180063	1638590	67	GWAS common	0.269	1.03	1.02081	1.03927	0.0295588	0.00457075
	1	21956126	C/T	180063	1638590	67	GWAS common	0.179	0.943396	1.0471	1.07306	-0.0582689	0.00624932
TCEA3	1	23383982	T/C	154412	1510340	66	GWAS common	0.492	0.970874	1.02137	1.0387	-0.0295588	0.00429277
THRAP3	1	36246432	C/T	179071	1631460	64	GWAS common	0.376	0.970874	1.01919	1.04092	-0.0295588	0.00538241
RHBDL2	1	38918953	T/C	174403	1586060	43	GWAS common	0.066	1.07	1.05015	1.09022	0.0676586	0.00955217
SCMH1	1	41078607	G/T	154412	1510330	66	GWAS common	0.337	1.04	1.02889	1.05123	0.0392207	0.00547856
HIVEP3	1	41970383	C/T	180063	1638590	67	GWAS common	0.47	1.02	1.01277	1.02728	0.0198026	0.00363024
AGBL4	1	48844092	A/G	158718	1407980	27	GWAS common	0.026	1.12	1.08805	1.15289	0.113329	0.0147668
LINC02808	1	50281325	C/T	157925	1404480	25	GWAS common	0.023	1.18	1.14385	1.21729	0.165514	0.0158731
FAF1	1	50851367	A/C	160161	1412380	29	GWAS common	0.025	1.21	1.17497	1.24607	0.19062	0.0149879
EPS15-AS1	1	51548243	C/T	143130	1298960	29	GWAS common	0.026	1.19	1.15454	1.22655	0.173953	0.0154334
SHISAL2A	1	52645587	C/T	157262	1397400	24	GWAS common	0.023	1.13	1.0933	1.16793	0.122218	0.0168431
LINC01708	1	99584092	T/C	179072	1631470	64	GWAS common	0.491	1.03	1.02143	1.03864	0.0295588	0.00426243
KCND3	1	111855365	C/T	179223	1627040	61	GWAS common	0.184	1.07	1.05548	1.08472	0.0676586	0.00697176
CASQ2	1	115768346	T/C	180063	1638590	67	GWAS common	0.312	0.943396	1.05036	1.06973	-0.0582689	0.00466266
	1	147844695	G/A	165073	1458290	45	GWAS common	0.063	0.900901	1.09001	1.13035	-0.10436	0.00927071
KCNN3	1	154839804	T/C	179072	1631460	64	GWAS common	0.312	1.14	1.12898	1.15113	0.131028	0.00495785
ASH1L	1	155444977	T/C	177450	1622140	57	GWAS common	0.157	1.06	1.04801	1.07212	0.0582689	0.00580273
RAB25	1	156068267	A/C	158108	1398260	25	GWAS common	0.024	1.09	1.05843	1.12252	0.0861777	0.014997
SELP	1	169623875	G/A	165283	1459110	45	GWAS common	0.067	1.06	1.04025	1.08012	0.0582689	0.00959567
	1	170138857	C/T	164422	1440470	40	GWAS common	0.047	1.13	1.10711	1.15336	0.122218	0.0104395
PRRX1	1	170659114	G/A	180062	1638590	67	GWAS common	0.473	1.09	1.08108	1.099	0.0861777	0.00419364
PPFIA4	1	203062187	G/T	179733	1637460	66	GWAS common	0.461	1.08	1.07035	1.08973	0.076961	0.00457706
MDM4	1	204555346	T/G	157917	1503980	51	GWAS common	0.312	0.970874	1.01996	1.04014	-0.0295588	0.00499689
NUCKS1	1	205716224	C/T	180063	1638590	67	GWAS common	0.392	1.04	1.03044	1.04965	0.0392207	0.00471029
PFKFB2	1	207076510	A/G	180062	1638590	67	GWAS common	0.489	1.03	1.01994	1.04016	0.0295588	0.00500977
LINC02775	1	214111956	C/G	152673	1153440	37	GWAS common	0.043	1.08	1.05475	1.10586	0.076961	0.0120708
	1	217183138	T/C	180063	1638590	67	GWAS common	0.279	1.03	1.02062	1.03947	0.0295588	0.00466722
LINC02869	1	218461445	G/A	180063	1638590	67	GWAS common	0.318	1.03	1.01958	1.04052	0.0295588	0.005186
CDC42BPA	1	227066304	C/T	177258	1620000	57	GWAS common	0.154	0.961538	1.02641	1.05377	-0.0392207	0.00671254
ZNF678	1	227570293	T/C	162509	1427060	34	GWAS common	0.034	0.917431	1.0618	1.11895	-0.0861777	0.013375
OBSCN	1	228324335	T/G	180063	1638590	67	GWAS common	0.23	0.970874	1.01917	1.04094	-0.0295588	0.0053905
	2	615140	C/T	179944	1637820	66	GWAS common	0.168	0.961538	1.02731	1.05285	-0.0392207	0.00626326
	2	10038109	A/G	179449	1631990	63	GWAS common	0.194	1.04	1.02943	1.05068	0.0392207	0.00521168
DNMT3A	2	25235231	C/A	179744	1635840	65	GWAS common	0.32	0.970874	1.01974	1.04037	-0.0295588	0.00510933
KIF3C	2	25937071	C/T	179191	1632230	65	GWAS common	0.246	0.943396	1.04799	1.07215	-0.0582689	0.00581595
CRIM1	2	36427629	C/T	180063	1638590	67	GWAS common	0.175	0.961538	1.02742	1.05274	-0.0392207	0.00621007
LINC00211	2	37870755	A/G	180061	1638590	67	GWAS common	0.424	1.03	1.02079	1.03929	0.0295588	0.00458097
THADA	2	43240696	G/A	180063	1638590	67	GWAS common	0.175	0.970874	1.01972	1.04039	-0.0295588	0.00511966
EPAS1	2	46307199	A/G	179191	1632240	65	GWAS common	0.436	1.03	1.02072	1.03936	0.0295588	0.00461542
PUS10	2	60956747	G/A	180062	1638590	67	GWAS common	0.421	0.970874	1.02128	1.0388	-0.0295588	0.00433851
	2	61548229	C/T	180063	1638590	67	GWAS common	0.386	0.961538	1.03161	1.04846	-0.0392207	0.00413245
CEP68	2	65052671	T/C	180063	1638590	67	GWAS common	0.378	0.934579	1.06105	1.07902	-0.0676586	0.00428366
GFPT1	2	69325319	G/T	167878	1482480	57	GWAS common	0.166	0.961538	1.02568	1.05452	-0.0392207	0.00707396
GMCL1	2	69864114	T/C	180063	1638590	67	GWAS common	0.484	0.952381	1.04104	1.05904	-0.0487902	0.00437379
ZNF638	2	71392981	T/C	180063	1638590	67	GWAS common	0.394	1.03	1.02061	1.03948	0.0295588	0.00467501
AFF3	2	99598153	C/G	159321	1211050	65	GWAS common	0.166	1.04	1.02556	1.05464	0.0392207	0.00713116
GYPC	2	126665499	A/G	166116	1472000	51	GWAS common	0.102	1.07	1.05435	1.08588	0.0676586	0.00751693
TEX41	2	145062629	A/G	178280	1614780	55	GWAS common	0.213	1.05	1.03266	1.06763	0.0487902	0.00849636
MBD5	2	148076795	A/G	180063	1638590	67	GWAS common	0.427	1.03	1.02137	1.03871	0.0295588	0.00429491
WIPF1	2	174648092	A/G	180063	1638590	67	GWAS common	0.468	1.06	1.05112	1.06895	0.0582689	0.00429181
TTN	2	178549906	A/C	180063	1638590	67	GWAS common	0.224	1.1	1.08799	1.11215	0.0953102	0.00560272
SESTD1	2	179245255	A/G	156470	1393210	22	GWAS common	0.018	1.15	1.10934	1.19215	0.139762	0.0183666
SF3B1	2	197439853	G/A	180063	1638590	67	GWAS common	0.337	1.03	1.02064	1.03944	0.0295588	0.00465684
PLCL1	2	198079547	G/A	180063	1638590	67	GWAS common	0.469	0.970874	1.02159	1.03848	-0.0295588	0.00418091
FTCDNL1	2	199812902	C/T	180063	1638590	67	GWAS common	0.201	1.04	1.02776	1.05239	0.0392207	0.00604204
SPATS2L	2	200319165	A/G	179562	1637620	66	GWAS common	0.414	1.06	1.05108	1.06899	0.0582689	0.00431057
ERBB4	2	212386779	T/C	179861	1636600	66	GWAS common	0.329	0.961538	1.03105	1.04903	-0.0392207	0.00440975
LRRFIP1	2	237635819	C/G	159440	1211820	66	GWAS common	0.473	0.970874	1.02157	1.0385	-0.0295588	0.00419231
CAND2	3	12800305	G/A	179863	1636610	66	GWAS common	0.387	0.925926	1.07095	1.08913	-0.076961	0.0042933
FGD5	3	14836067	A/G	179810	1635890	65	GWAS common	0.173	0.952381	1.03708	1.06308	-0.0487902	0.00631602
ZNF385D	3	21915732	A/C	154024	1509580	65	GWAS common	0.24	0.970874	1.01957	1.04054	-0.0295588	0.00519359
THRB	3	24421744	T/C	180063	1638590	67	GWAS common	0.295	0.952381	1.04025	1.05985	-0.0487902	0.00476175
	3	25118663	T/C	180063	1638590	67	GWAS common	0.482	1.02	1.01299	1.02706	0.0198026	0.00352075
ITGA9	3	37494734	C/A	159892	1267000	66	GWAS common	0.411	1.03	1.02118	1.0389	0.0295588	0.00438771
DLEC1	3	38062285	A/G	166995	1536420	24	GWAS common	0.017	1.13	1.09107	1.17032	0.122218	0.0178866
SCN10A	3	38736063	G/T	180063	1638590	67	GWAS common	0.391	0.943396	1.05144	1.06863	-0.0582689	0.00413878
LRIG1	3	66397883	G/A	180063	1638590	67	GWAS common	0.364	1.04	1.03162	1.04845	0.0392207	0.00412937
FRMD4B	3	69353338	G/T	180063	1638590	67	GWAS common	0.268	0.970874	1.02061	1.03948	-0.0295588	0.00467501
EPHA3	3	89433084	T/C	180063	1638590	67	GWAS common	0.388	0.961538	1.03174	1.04833	-0.0392207	0.00406918
	3	89938721	G/A	180061	1638580	67	GWAS common	0.378	0.970874	1.02118	1.03889	-0.0295588	0.00438535
PHLDB2	3	111871435	T/C	180063	1638590	67	GWAS common	0.333	0.943396	1.04998	1.07012	-0.0582689	0.0048457
IGSF11	3	119098724	G/C	156984	1180900	50	GWAS common	0.061	0.943396	1.03825	1.08221	-0.0582689	0.010579
DTX3L	3	122567313	G/A	180063	1638590	67	GWAS common	0.274	0.970874	1.02159	1.03848	-0.0295588	0.00418091
COPG1	3	129249281	A/G	178418	1627140	62	GWAS common	0.096	1.04	1.02552	1.05468	0.0392207	0.0071525
	3	136215057	A/G	179190	1632240	65	GWAS common	0.462	1.04	1.0302	1.04989	0.0392207	0.0048287
STAG1	3	136752973	C/T	180063	1638590	67	GWAS common	0.42	1.03	1.0209	1.03918	0.0295588	0.00452947
ZBTB38	3	141383991	A/G	180063	1638590	67	GWAS common	0.444	1.03	1.02078	1.0393	0.0295588	0.00458761
GYG1	3	148997107	T/C	180063	1638590	67	GWAS common	0.349	0.970874	1.02048	1.03961	-0.0295588	0.00473683
FNDC3B	3	172204265	G/A	180063	1638590	67	GWAS common	0.476	0.970874	1.02053	1.03956	-0.0295588	0.00471235
GNB4	3	179455191	T/G	180063	1638590	67	GWAS common	0.19	1.05	1.03934	1.06077	0.0487902	0.00520832
PSMD2	3	184302754	G/T	177672	1622780	58	GWAS common	0.161	0.961538	1.02743	1.05273	-0.0392207	0.00620664
XXYLT1	3	195080713	T/G	180063	1638590	67	GWAS common	0.27	1.05	1.03967	1.06043	0.0487902	0.0050422
PAK2	3	196741023	G/T	179191	1632240	65	GWAS common	0.411	1.03	1.01948	1.04063	0.0295588	0.00523707
IDUA	4	1007954	T/C	179733	1637470	66	GWAS common	0.328	1.03	1.02111	1.03896	0.0295588	0.00442085
WDR1	4	10102854	C/T	180063	1638590	67	GWAS common	0.315	0.961538	1.03032	1.04977	-0.0392207	0.00477155
REST	4	56953628	T/C	180063	1638590	67	GWAS common	0.458	0.970874	1.01999	1.0401	-0.0295588	0.00498096
SLC4A4	4	71261907	A/G	166404	1495840	38	GWAS common	0.085	0.884956	1.0894	1.17211	-0.122218	0.0186691
SHROOM3	4	76614683	A/G	180063	1638590	67	GWAS common	0.407	0.970874	1.0195	1.0406	-0.0295588	0.00522616
	4	80261400	C/T	180063	1638590	67	GWAS common	0.307	1.04	1.03147	1.04861	0.0392207	0.00420423
THAP9	4	82920711	A/T	159438	1211800	66	GWAS common	0.178	1.04	1.02693	1.05323	0.0392207	0.00645052
ARHGAP24	4	85526818	A/T	158568	1205460	64	GWAS common	0.356	0.970874	1.0207	1.03938	-0.0295588	0.00462587
SMARCAD1	4	94234354	C/T	179810	1635890	65	GWAS common	0.352	0.970874	1.02154	1.03853	-0.0295588	0.00420957
CISD2	4	102878371	C/T	174084	1586920	51	GWAS common	0.483	1.04	1.03164	1.04843	0.0392207	0.00411899
PITX2	4	110796911	G/A	180063	1638590	67	GWAS common	0.264	1.45	1.45	1.45	0.371564	0
	4	111394878	A/C	145940	1418320	16	GWAS common	0.019	1.2	1.14989	1.25229	0.182322	0.0217612
CAMK2D	4	113528563	C/A	179944	1637820	66	GWAS common	0.253	1.05	1.0402	1.05989	0.0487902	0.00478374
ARHGAP10	4	148029042	A/G	179112	1622240	60	GWAS common	0.078	1.1	1.08284	1.11743	0.0953102	0.00802069
LINC02269	4	173726215	G/A	178485	1623320	57	GWAS common	0.091	0.917431	1.07305	1.10722	-0.0861777	0.00799566
LRRC14B	5	188632	C/T	179191	1632230	65	GWAS common	0.451	1.03	1.02054	1.03955	0.0295588	0.00470968
GHR	5	42596359	G/T	168100	1483130	58	GWAS common	0.169	0.970874	1.01923	1.04088	-0.0295588	0.00536273
ZNF131	5	43125693	A/G	176017	1602420	50	GWAS common	0.122	0.961538	1.02672	1.05346	-0.0392207	0.00655934
LINC02056	5	72640428	T/A	152725	1151220	37	GWAS common	0.053	1.08	1.05532	1.10525	0.076961	0.0117932
MEF2C-AS1	5	89097307	C/T	180063	1638590	67	GWAS common	0.386	0.980392	1.01288	1.02717	-0.0198026	0.00357166
	5	107115284	C/A	180060	1638580	67	GWAS common	0.473	1.03	1.02099	1.03909	0.0295588	0.00448475
KCNN2	5	114421342	A/G	180063	1638590	67	GWAS common	0.306	1.06	1.04964	1.07046	0.0582689	0.00501084
	5	115037258	G/T	180063	1638590	67	GWAS common	0.482	1.03	1.02164	1.03843	0.0295588	0.00415802
SLC27A6	5	128927029	C/T	179810	1635890	65	GWAS common	0.203	0.961538	1.02924	1.05087	-0.0392207	0.00530607
SPOCK1	5	137429017	A/G	180063	1638590	67	GWAS common	0.349	1.04	1.02989	1.0502	0.0392207	0.00498185
	5	138044914	G/A	168460	1487030	60	GWAS common	0.177	1.13	1.11674	1.14341	0.122218	0.00602128
HSPA9	5	138572184	C/A	162646	1440320	36	GWAS common	0.045	1.1	1.07527	1.12529	0.0953102	0.0115994
SIL1	5	139172589	T/C	160515	1413930	29	GWAS common	0.03	1.09	1.05947	1.12141	0.0861777	0.0144937
	5	140316918	A/G	180062	1638590	67	GWAS common	0.221	1.04	1.02972	1.05038	0.0392207	0.00506941
PCDHB1	5	141047497	G/A	163431	1441120	38	GWAS common	0.06	1.06	1.03946	1.08095	0.0582689	0.00998562
ARHGAP26	5	142904030	G/C	159440	1211820	66	GWAS common	0.308	0.961538	1.02763	1.05252	-0.0392207	0.00610453
	5	143445440	A/G	178459	1624860	60	GWAS common	0.232	1.07	1.05956	1.08055	0.0676586	0.00500453
SLIT3	5	168965856	T/C	150120	1463220	44	GWAS common	0.06	1.07	1.04769	1.09278	0.0676586	0.0107494
	5	173243742	G/T	179391	1634220	66	GWAS common	0.325	0.934579	1.05945	1.08066	-0.0676586	0.00505552
CPEB4	5	173912528	T/C	178804	1631480	64	GWAS common	0.31	0.952381	1.04023	1.05986	-0.0487902	0.00476916
RREB1	6	7156791	C/T	153947	1505780	63	GWAS common	0.123	1.04	1.02595	1.05424	0.0392207	0.00693847
ATXN1	6	16414322	G/A	168567	1487920	61	GWAS common	0.135	0.900901	1.09556	1.12463	-0.10436	0.00667893
KDM1B	6	18209878	A/G	154145	1506370	64	GWAS common	0.311	1.07	1.05925	1.08086	0.0676586	0.00515329
LNC-LBCS	6	19377102	A/G	179917	1636790	66	GWAS common	0.435	0.970874	1.02089	1.03919	-0.0295588	0.00453429
HDGFL1	6	22571094	C/T	179917	1636790	66	GWAS common	0.26	1.03	1.02048	1.03961	0.0295588	0.00473683
AIF1	6	31610688	G/A	168926	1543390	27	GWAS common	0.022	0.909091	1.06552	1.1356	-0.0953102	0.0162485
RNF5	6	32177622	C/G	150768	1137240	32	GWAS common	0.029	0.909091	1.06697	1.13405	-0.0953102	0.0155537
CYCSP55	6	34217978	C/T	179301	1623130	61	GWAS common	0.113	1.06	1.04438	1.07586	0.0582689	0.00757539
CDKN1A	6	36679512	G/A	179917	1636780	66	GWAS common	0.193	0.934579	1.05852	1.08161	-0.0676586	0.005505
VEGFA	6	43790159	C/A	179587	1635660	65	GWAS common	0.479	0.970874	1.01989	1.04021	-0.0295588	0.00503267
TMEM30A-DT	6	75295917	G/A	159361	1407750	28	GWAS common	0.031	0.892857	1.08995	1.15088	-0.113329	0.0138763
MYO6	6	75839379	A/G	177105	1615020	52	GWAS common	0.085	1.05	1.0356	1.0646	0.0487902	0.00704585
ZNF292	6	87169658	T/C	154266	1508530	65	GWAS common	0.384	0.961538	1.03063	1.04946	-0.0392207	0.00461757
AKIRIN2	6	87684240	C/A	179917	1636790	66	GWAS common	0.264	0.970874	1.02137	1.0387	-0.0295588	0.00429277
	6	100165675	C/T	178393	1628350	62	GWAS common	0.229	1.04	1.02901	1.05111	0.0392207	0.00542151
BVES	6	105131334	T/C	177215	1602830	49	GWAS common	0.06	0.943396	1.04167	1.07865	-0.0582689	0.00890077
	6	117208687	C/T	179917	1636780	66	GWAS common	0.425	1.04	1.03077	1.04931	0.0392207	0.00454639
SLC35F1	6	118117355	C/T	162836	1435350	35	GWAS common	0.036	1.08	1.0526	1.10812	0.076961	0.0131119
CEP85L	6	118653635	G/T	179598	1634030	64	GWAS common	0.26	1.07	1.05922	1.08089	0.0676586	0.00516844
	6	121421867	G/C	130052	1020770	25	GWAS common	0.139	0.917431	1.06439	1.11622	-0.0861777	0.0121285
	6	122070990	A/C	179917	1636790	66	GWAS common	0.349	0.934579	1.06105	1.07903	-0.0676586	0.00428761
PKIB	6	122588164	A/G	179917	1636790	66	GWAS common	0.408	0.970874	1.02146	1.03861	-0.0295588	0.00424663
	6	133122523	T/C	179416	1635820	65	GWAS common	0.212	1.04	1.02827	1.05186	0.0392207	0.00578763
TARID	6	133881068	T/C	175527	1587860	44	GWAS common	0.065	0.943396	1.04003	1.08035	-0.0582689	0.00970294
	6	134797951	C/T	179917	1636780	66	GWAS common	0.423	1.04	1.03042	1.04966	0.0392207	0.00471956
	6	139965099	A/C	179917	1636780	66	GWAS common	0.453	0.980392	1.01278	1.02727	-0.0198026	0.00362203
UST	6	149077964	T/G	175860	1604860	50	GWAS common	0.098	1.12	1.10295	1.13732	0.113329	0.00782745
SUN1	7	833467	T/C	179917	1636790	66	GWAS common	0.407	0.961538	1.03081	1.04927	-0.0392207	0.00452986
GNA12	7	2751051	T/C	179917	1636790	66	GWAS common	0.292	0.970874	1.02053	1.03956	-0.0295588	0.00471495
FOXK1	7	4683522	C/T	151050	1476600	52	GWAS common	0.095	1.07	1.04929	1.09111	0.0676586	0.0099698
DGKB	7	14334089	T/C	161727	1606470	63	GWAS common	0.252	1.05	1.03953	1.06057	0.0487902	0.00511114
	7	27216845	C/T	177322	1607510	53	GWAS common	0.18	0.952381	1.03262	1.06767	-0.0487902	0.00851378
CREB5	7	28372253	C/A	168566	1487920	61	GWAS common	0.242	0.952381	1.0391	1.06102	-0.0487902	0.00532571
	7	45968511	G/A	179916	1636790	66	GWAS common	0.408	0.970874	1.0194	1.04071	-0.0295588	0.00527809
GTF2I	7	74659260	G/A	148389	1063110	59	GWAS common	0.192	1.05	1.03585	1.06434	0.0487902	0.00692292
POM121C	7	75460906	A/G	165176	1458450	52	GWAS common	0.117	1.05	1.03527	1.06494	0.0487902	0.00720708
RSBN1L	7	77771272	G/T	179917	1636790	66	GWAS common	0.467	1.03	1.02091	1.03917	0.0295588	0.00452232
	7	80954166	G/A	179529	1636030	65	GWAS common	0.436	1.03	1.02088	1.0392	0.0295588	0.00453662
CDK6	7	92658535	T/G	178343	1625830	60	GWAS common	0.27	0.952381	1.0396	1.0605	-0.0487902	0.00507691
CDHR3	7	105972561	T/C	179586	1635660	65	GWAS common	0.3	1.04	1.02913	1.05099	0.0392207	0.00536154
COG5	7	107382061	C/T	179587	1635660	65	GWAS common	0.241	1.04	1.02877	1.05135	0.0392207	0.00554028
	7	113473476	G/T	148641	1469790	63	GWAS common	0.397	0.961538	1.02863	1.0515	-0.0392207	0.00561102
TFEC	7	116026867	C/T	159858	1414730	41	GWAS common	0.06	0.934579	1.05006	1.09032	-0.0676586	0.009596
CAV1	7	116546187	G/A	174964	1602420	65	GWAS common	0.404	0.900901	1.10014	1.11995	-0.10436	0.00455367
OPN1SW	7	128776990	G/T	159670	1417160	41	GWAS common	0.062	1.08	1.06001	1.10036	0.076961	0.00953104
	7	148952514	A/G	179370	1631000	62	GWAS common	0.169	1.04	1.02731	1.05285	0.0392207	0.00626326
KCNH2	7	150964321	G/A	179917	1636790	66	GWAS common	0.195	0.943396	1.04851	1.07161	-0.0582689	0.00555918
	8	11941639	A/G	178393	1628370	62	GWAS common	0.407	1.04	1.03107	1.04901	0.0392207	0.00440087
DLC1	8	13514611	G/A	176537	1601180	48	GWAS common	0.067	0.943396	1.04172	1.07861	-0.0582689	0.00887749
ASAH1	8	18056461	A/G	179798	1634650	65	GWAS common	0.291	0.934579	1.05993	1.08017	-0.0676586	0.00482423
XPO7	8	21947754	T/C	179917	1636790	66	GWAS common	0.127	0.917431	1.07568	1.10451	-0.0861777	0.0067491
	8	26687435	A/C	178393	1628370	62	GWAS common	0.098	0.961538	1.02587	1.05432	-0.0392207	0.00697882
NCOA2	8	70208042	G/A	179490	1631780	63	GWAS common	0.179	0.961538	1.0276	1.05255	-0.0392207	0.00611816
	8	77184925	C/A	179798	1634650	65	GWAS common	0.275	1.03	1.02058	1.0395	0.0295588	0.00468565
ZFPM2	8	104961608	T/C	157771	1502180	50	GWAS common	0.202	0.961538	1.02764	1.0525	-0.0392207	0.00609782
EXT1	8	117866891	C/T	179798	1634650	65	GWAS common	0.172	1.04	1.02843	1.0517	0.0392207	0.00570972
FBXO32	8	123533862	T/C	164603	1449490	41	GWAS common	0.061	1.13	1.10881	1.15159	0.122218	0.00965767
LINC00964	8	124847575	A/C	179916	1636790	66	GWAS common	0.337	1.03	1.02077	1.03931	0.0295588	0.00459035
	8	134800173	A/G	168565	1487910	61	GWAS common	0.097	1.07	1.05307	1.0872	0.0676586	0.00813624
PTK2	8	140830782	C/T	179917	1636790	66	GWAS common	0.477	1.04	1.03116	1.04892	0.0392207	0.00435745
PLEC	8	143944186	T/C	163870	1438320	38	GWAS common	0.046	1.09	1.06641	1.11411	0.0861777	0.0111608
PTPRD	9	8895340	G/A	179714	1634780	65	GWAS common	0.43	0.970874	1.02179	1.03827	-0.0295588	0.00408242
	9	20215707	A/G	161982	1609180	65	GWAS common	0.427	0.961538	1.02976	1.05034	-0.0392207	0.00504678
MFSD14B	9	94429578	T/A	131316	1025560	34	GWAS common	0.462	1.04	1.02864	1.05149	0.0392207	0.005606
AOPEP	9	94960984	A/G	179917	1636790	66	GWAS common	0.403	1.08	1.07053	1.08955	0.076961	0.00449144
SLC35D2	9	96325514	T/C	178926	1629660	63	GWAS common	0.157	1.03	1.01921	1.04091	0.0295588	0.00537442
PTCSC2	9	97784318	C/T	179717	1634800	65	GWAS common	0.327	1.03	1.0207	1.03939	0.0295588	0.0046285
	9	98864407	C/A	167753	1482160	57	GWAS common	0.269	0.970874	1.0195	1.04061	-0.0295588	0.0052292
PSMB7	9	124413442	T/C	179917	1636790	66	GWAS common	0.417	0.970874	1.02015	1.03994	-0.0295588	0.00490038
LHX3	9	136200833	C/T	179917	1636780	66	GWAS common	0.448	0.970874	1.02229	1.03777	-0.0295588	0.00383239
EBLN1	10	22207976	A/C	181300	1651080	67	GWAS common	0.249	1.03	1.01994	1.04016	0.0295588	0.00500977
CCDC7	10	32758334	C/T	181300	1651080	67	GWAS common	0.145	0.961538	1.02696	1.0532	-0.0392207	0.00643577
	10	43358825	A/G	181299	1651080	67	GWAS common	0.434	1.03	1.02029	1.0398	0.0295588	0.00483243
	10	49221982	C/T	181300	1651080	67	GWAS common	0.104	0.943396	1.04505	1.07517	-0.0582689	0.00724904
REEP3	10	63559918	T/C	181300	1651080	67	GWAS common	0.462	0.952381	1.04156	1.05851	-0.0487902	0.00411848
CTNNA3	10	67563172	T/G	138986	1144890	50	GWAS common	0.167	1.07	1.0546	1.08562	0.0676586	0.00739525
HERC4	10	68078651	A/G	180220	1633080	59	GWAS common	0.172	1.07	1.05394	1.0863	0.0676586	0.00771441
P4HA1	10	73022124	T/G	170608	1494070	60	GWAS common	0.082	0.934579	1.05222	1.08808	-0.0676586	0.00854693
SYNPO2L	10	73655919	C/T	181300	1651080	67	GWAS common	0.147	0.892857	1.10716	1.13299	-0.113329	0.00588252
DUSP13	10	75101922	T/C	181100	1649100	66	GWAS common	0.434	0.970874	1.02103	1.03905	-0.0295588	0.0044639
LRMDA	10	76175587	G/A	181300	1651080	67	GWAS common	0.221	1.05	1.03963	1.06047	0.0487902	0.00506202
ZMIZ1	10	79139212	T/G	154291	1515730	64	GWAS common	0.487	0.970874	1.0208	1.03928	-0.0295588	0.00457597
LDB3	10	86685984	T/C	181300	1651080	67	GWAS common	0.341	0.970874	1.02142	1.03865	-0.0295588	0.00426661
SLC16A12	10	89510130	A/G	181300	1651080	67	GWAS common	0.191	1.03	1.02003	1.04007	0.0295588	0.00496208
NEURL1	10	103582915	G/A	181300	1651080	67	GWAS common	0.161	1.18	1.16648	1.19367	0.165514	0.0058782
RBM20	10	110816937	T/C	180981	1648320	65	GWAS common	0.149	1.06	1.04567	1.07452	0.0582689	0.0069436
NRAP	10	113646548	G/A	155649	1522830	66	GWAS common	0.363	0.970874	1.02027	1.03983	-0.0295588	0.00484442
ABLIM1	10	114655839	T/C	181300	1651080	67	GWAS common	0.494	1.03	1.02151	1.03856	0.0295588	0.00422498
	10	118665783	T/C	181300	1651080	67	GWAS common	0.336	0.970874	1.01988	1.04022	-0.0295588	0.00503919
FGFR2	10	121592803	G/A	181299	1651080	67	GWAS common	0.386	0.970874	1.02164	1.03843	-0.0295588	0.00415663
LSP1	11	1871700	A/G	171473	1510640	66	GWAS common	0.365	1.03	1.0201	1.04	0.0295588	0.00492827
RHOG	11	3841113	G/T	145567	1379680	63	GWAS common	0.257	0.961538	1.02703	1.05313	-0.0392207	0.00640045
SPON1	11	14050863	C/T	181300	1651080	67	GWAS common	0.461	1.04	1.0304	1.04968	0.0392207	0.00472911
NAV2	11	19988805	A/G	181300	1651080	67	GWAS common	0.259	1.07	1.05984	1.08026	0.0676586	0.0048686
ANO5	11	22199694	A/C	181299	1651080	67	GWAS common	0.476	0.970874	1.02045	1.03964	-0.0295588	0.00475048
MPPED2	11	30515959	T/C	181300	1651080	67	GWAS common	0.289	1.03	1.02078	1.0393	0.0295588	0.00458575
PRDM11	11	45200412	G/C	160358	1221560	64	GWAS common	0.284	1.03	1.01926	1.04085	0.0295588	0.00534716
RAD9A	11	67325889	C/T	180716	1647240	64	GWAS common	0.418	0.970874	1.01939	1.04072	-0.0295588	0.00528187
	11	69278268	G/A	181300	1651080	67	GWAS common	0.478	0.970874	1.02015	1.03994	-0.0295588	0.00490038
	11	95362500	G/A	181300	1651080	67	GWAS common	0.332	1.03	1.02161	1.03846	0.0295588	0.00417317
ATF4P4	11	113792288	A/G	179170	1634420	57	GWAS common	0.11	1.05	1.03504	1.06518	0.0487902	0.00732298
	11	121775872	C/A	181300	1651080	67	GWAS common	0.279	1.03	1.02093	1.03915	0.0295588	0.00451273
KCNJ5	11	128894675	A/G	180047	1631860	59	GWAS common	0.088	1.11	1.09361	1.12664	0.10436	0.00759103
CCND2	12	4275678	G/T	130837	1261230	22	GWAS common	0.022	1.19	1.14453	1.23727	0.173953	0.0198751
APOLD1	12	12733093	A/G	179489	1631770	63	GWAS common	0.125	1.05	1.03649	1.06369	0.0487902	0.00660863
	12	24619033	C/T	179050	1629390	61	GWAS common	0.142	0.909091	1.08722	1.11293	-0.0953102	0.00596181
SSPN	12	26195371	T/C	179917	1636780	66	GWAS common	0.304	0.952381	1.03955	1.06055	-0.0487902	0.00510227
ITPR2	12	26708572	A/G	178452	1626140	59	GWAS common	0.242	1.03	1.01965	1.04045	0.0295588	0.00515093
PKP2	12	32827227	T/G	179917	1636790	66	GWAS common	0.139	1.06	1.04691	1.07326	0.0582689	0.00634144
	12	33357180	A/G	179917	1636790	66	GWAS common	0.488	0.980392	1.01311	1.02694	-0.0198026	0.00346052
ARID2	12	45906317	T/C	158736	1409960	27	GWAS common	0.031	1.1	1.06921	1.13167	0.0953102	0.0144831
Y_RNA	12	50941804	T/A	159294	1210010	65	GWAS common	0.456	1.03	1.02006	1.04003	0.0295588	0.00494644
RDH5	12	55721801	T/C	152451	1494440	58	GWAS common	0.218	1.03	1.01921	1.04091	0.0295588	0.00537442
NACA	12	56709370	T/C	179917	1636790	66	GWAS common	0.271	1.06	1.04943	1.07068	0.0582689	0.00511303
	12	69620934	T/C	179917	1636780	66	GWAS common	0.418	0.961538	1.0318	1.04826	-0.0392207	0.0040366
	12	75845075	C/T	179917	1636790	66	GWAS common	0.498	0.961538	1.03128	1.0488	-0.0392207	0.00429749
ATP2B1	12	89631845	A/G	179917	1636790	66	GWAS common	0.398	0.970874	1.0196	1.04051	-0.0295588	0.00517941
CRADD	12	93786851	A/G	179917	1636790	66	GWAS common	0.499	1.02	1.01287	1.02718	0.0198026	0.00357944
NFYB	12	104119140	T/G	181299	1651080	67	GWAS common	0.185	0.952381	1.03691	1.06325	-0.0487902	0.00639914
RFX4	12	106750550	A/G	154149	1396100	65	GWAS common	0.359	0.970874	1.02075	1.03933	-0.0295588	0.00460315
HVCN1	12	110648180	A/G	169950	1502220	62	GWAS common	0.231	0.970874	1.02002	1.04008	-0.0295588	0.0049683
TBX5	12	114355435	T/C	181300	1651080	67	GWAS common	0.315	0.900901	1.0995	1.1206	-0.10436	0.00484953
	12	114911692	C/T	181300	1651080	67	GWAS common	0.316	0.970874	1.0216	1.03847	-0.0295588	0.00417877
	12	115789444	T/C	167182	1474550	49	GWAS common	0.073	1.06	1.04296	1.07732	0.0582689	0.00826788
CIT	12	119857862	G/A	137652	1027090	23	GWAS common	0.023	0.892857	1.08226	1.15905	-0.113329	0.0174867
HIP1R	12	122863933	G/A	179917	1636790	66	GWAS common	0.138	1.05	1.03773	1.06242	0.0487902	0.00599865
ZNF664	12	124015292	C/T	178392	1628370	62	GWAS common	0.186	0.952381	1.03734	1.06282	-0.0487902	0.00619063
FBRSL1	12	132561971	G/A	177965	1623360	59	GWAS common	0.17	0.961538	1.02882	1.0513	-0.0392207	0.00551531
MICU2	13	21538714	C/T	154266	1508530	65	GWAS common	0.4	1.03	1.02136	1.03872	0.0295588	0.00429904
	13	22794804	T/C	168140	1482910	58	GWAS common	0.265	1.06	1.04864	1.07148	0.0582689	0.00549658
LRCH1	13	46647085	C/G	159294	1210020	65	GWAS common	0.321	0.961538	1.02848	1.05165	-0.0392207	0.00568257
EBPL	13	49663119	A/G	160955	1418690	31	GWAS common	0.026	1.1	1.0676	1.13339	0.0953102	0.0152557
DLEU1	13	50418947	C/T	161833	1423850	33	GWAS common	0.035	1.08	1.05183	1.10893	0.076961	0.0134854
KLF12	13	73944073	A/G	179917	1636790	66	GWAS common	0.348	1.03	1.02019	1.0399	0.0295588	0.00488226
FGF14	13	102290788	C/T	179917	1636780	66	GWAS common	0.271	0.970874	1.02054	1.03955	-0.0295588	0.00470968
ADPRHL1	13	113424243	C/A	172207	1567450	35	GWAS common	0.035	1.07	1.04505	1.09555	0.0676586	0.012039
MYH6	14	23392602	G/A	162392	1520260	64	GWAS common	0.353	1.05	1.04015	1.05995	0.0487902	0.00481113
AKAP6	14	32514611	A/G	179717	1634800	65	GWAS common	0.298	1.07	1.05991	1.08018	0.0676586	0.00483309
CFL2	14	34715335	T/C	179917	1636790	66	GWAS common	0.398	1.05	1.04019	1.0599	0.0487902	0.00478892
SYNE2	14	64213242	A/G	179917	1636790	66	GWAS common	0.475	1.07	1.06111	1.07897	0.0676586	0.00425866
DPF3	14	72889599	C/A	179917	1636780	66	GWAS common	0.372	0.961538	1.03175	1.04832	-0.0392207	0.00406419
LINC01629	14	76960182	C/T	154266	1508520	65	GWAS common	0.374	1.04	1.03109	1.04898	0.0392207	0.00438832
	14	85388136	T/C	179598	1634020	64	GWAS common	0.265	1.03	1.01952	1.04058	0.0295588	0.00521561
	14	95515273	T/C	179915	1636780	66	GWAS common	0.254	1.03	1.0203	1.0398	0.0295588	0.0048295
USP3	15	63560853	A/G	178393	1628370	62	GWAS common	0.295	1.03	1.02033	1.03976	0.0295588	0.00481228
	15	66843527	C/T	179916	1636790	66	GWAS common	0.359	1.03	1.02062	1.03947	0.0295588	0.00466722
	15	70166237	T/C	179917	1636790	66	GWAS common	0.241	0.970874	1.02032	1.03977	-0.0295588	0.00481797
	15	72859638	T/C	166273	1472170	51	GWAS common	0.104	1.05	1.03393	1.06632	0.0487902	0.00786845
	15	73384923	T/C	179598	1634030	64	GWAS common	0.163	1.12	1.10675	1.13341	0.113329	0.00607339
LOXL1	15	73926125	A/C	179716	1634800	65	GWAS common	0.411	0.980392	1.01279	1.02726	-0.0198026	0.00361678
	15	80384583	G/A	179797	1636010	65	GWAS common	0.162	1.07	1.05776	1.08238	0.0676586	0.00587117
IGF1R	15	98729846	C/T	179917	1636780	66	GWAS common	0.384	1.04	1.03046	1.04963	0.0392207	0.00470255
CIAO3	16	734765	T/C	179045	1630430	64	GWAS common	0.274	1.03	1.02047	1.03962	0.0295588	0.00474215
RPL3L	16	1953015	A/G	133132	1276040	27	GWAS common	0.039	1.2	1.16672	1.23422	0.182322	0.0143475
CREBBP	16	3760985	G/A	179664	1634080	64	GWAS common	0.225	0.970874	1.01962	1.04048	-0.0295588	0.00516541
MYH11	16	15808858	G/A	179917	1636790	66	GWAS common	0.317	0.970874	1.02147	1.0386	-0.0295588	0.00424275
ARHGAP17	16	24991386	C/T	179917	1636790	66	GWAS common	0.397	1.03	1.01964	1.04047	0.0295588	0.00515795
	16	28996758	C/T	162392	1520260	64	GWAS common	0.347	0.970874	1.02028	1.03981	-0.0295588	0.00483824
	16	30135944	C/T	179045	1630420	64	GWAS common	0.475	0.980392	1.01284	1.02721	-0.0198026	0.00359527
FTO	16	53769662	A/T	159294	1210020	65	GWAS common	0.401	1.04	1.03009	1.05	0.0392207	0.00488275
ZFHX3	16	73017721	T/C	179917	1636790	66	GWAS common	0.199	1.2	1.18754	1.21259	0.182322	0.00532556
	16	86372699	A/C	179917	1636780	66	GWAS common	0.438	1.03	1.02059	1.03949	0.0295588	0.00468023
ZFPM1	16	88469183	T/C	153394	1502160	63	GWAS common	0.317	1.03	1.01944	1.04067	0.0295588	0.00525961
YWHAE	17	1370609	T/G	178193	1617220	56	GWAS common	0.124	0.934579	1.05339	1.08687	-0.0676586	0.00798282
SMG6	17	2185741	G/A	169203	1494620	63	GWAS common	0.325	1.04	1.02976	1.05034	0.0392207	0.00504678
LINC01975	17	3976199	T/C	178562	1613730	56	GWAS common	0.061	0.952381	1.03185	1.06847	-0.0487902	0.00889764
	17	7531723	G/A	179916	1636790	66	GWAS common	0.376	1.04	1.0305	1.04958	0.0392207	0.00467974
MYOCD	17	12709614	T/C	178593	1629400	60	GWAS common	0.106	0.934579	1.05528	1.08493	-0.0676586	0.00706994
ERBB2	17	39723509	G/A	179915	1636780	66	GWAS common	0.351	1.04	1.03046	1.04963	0.0392207	0.00470415
	17	45382815	A/G	167152	1478770	54	GWAS common	0.134	1.04	1.02602	1.05417	0.0392207	0.00690553
MAPT	17	45942346	G/A	151132	1488300	58	GWAS common	0.39	0.961538	1.03021	1.04989	-0.0392207	0.00482711
	17	46935905	C/T	176393	1616600	54	GWAS common	0.141	1.07	1.05567	1.08452	0.0676586	0.00687761
CEP112	17	66194802	T/G	177586	1599400	51	GWAS common	0.062	1.07	1.05198	1.08832	0.0676586	0.00866384
PITPNC1	17	67624704	G/A	179916	1636790	66	GWAS common	0.316	0.970874	1.02148	1.03859	-0.0295588	0.00423673
	17	70452588	A/C	179917	1636790	66	GWAS common	0.488	0.970874	1.0219	1.03817	-0.0295588	0.00402892
	18	1837203	A/G	178393	1628360	62	GWAS common	0.145	1.04	1.02564	1.05456	0.0392207	0.00709499
	18	2823279	A/G	168032	1480990	57	GWAS common	0.115	1.04	1.02615	1.05403	0.0392207	0.00683922
DSG2	18	31524751	G/A	155670	1237520	49	GWAS common	0.093	1.07	1.05238	1.08792	0.0676586	0.00847366
DTNA	18	34841675	G/A	179598	1634030	64	GWAS common	0.258	1.03	1.02107	1.03901	0.0295588	0.00444321
SMAD7	18	48947822	C/T	179916	1636780	66	GWAS common	0.354	0.961538	1.031	1.04908	-0.0392207	0.0044353
NFATC1	18	79398019	G/A	178016	1624470	63	GWAS common	0.207	0.970874	1.02005	1.04005	-0.0295588	0.00495278
DOT1L	19	2232050	A/G	178467	1624790	62	GWAS common	0.125	1.04	1.02706	1.05311	0.0392207	0.00638909
WDR62	19	36100514	A/G	167212	1480850	59	GWAS common	0.106	0.961538	1.02622	1.05397	-0.0392207	0.00680697
NECTIN2	19	44844654	A/C	178890	1630840	65	GWAS common	0.431	1.03	1.02001	1.04009	0.0295588	0.00497477
BICRA	19	47664678	C/T	178892	1630840	65	GWAS common	0.323	0.961538	1.02995	1.05015	-0.0392207	0.00495641
	19	57303321	T/C	178279	1624240	61	GWAS common	0.212	1.03	1.01992	1.04018	0.0295588	0.00501949
	20	6591367	A/C	147118	1106210	57	GWAS common	0.083	0.925926	1.06121	1.09913	-0.076961	0.00895677
ZNF877P	20	21265982	G/A	178892	1630840	65	GWAS common	0.348	1.03	1.02061	1.03948	0.0295588	0.00467232
KIAA1755	20	38220605	T/C	178891	1630840	65	GWAS common	0.465	1.03	1.01997	1.04013	0.0295588	0.00499393
JPH2	20	44186048	T/G	178892	1630840	65	GWAS common	0.431	1.03	1.02187	1.03819	0.0295588	0.00404074
NCOA5	20	46093017	T/C	167538	1481960	60	GWAS common	0.264	1.03	1.01921	1.04091	0.0295588	0.00537442
	20	49351083	C/T	132459	1117150	58	GWAS common	0.073	1.06	1.03927	1.08115	0.0582689	0.0100788
MIR1-1HG	20	62559739	G/T	178892	1630840	65	GWAS common	0.394	0.961538	1.03046	1.04963	-0.0392207	0.00470101
LINC01426	21	34746814	T/G	178639	1628130	63	GWAS common	0.103	0.900901	1.0941	1.12614	-0.10436	0.0073634
RUNX1	21	35450246	T/C	178891	1630840	65	GWAS common	0.319	1.04	1.03101	1.04907	0.0392207	0.00443015
BRWD1	21	39255094	A/C	178892	1630840	65	GWAS common	0.384	0.961538	1.03035	1.04974	-0.0392207	0.00475385
CFAP410	21	44338348	A/G	172381	1571670	37	GWAS common	0.038	1.08	1.05401	1.10663	0.076961	0.0124264
TUBA8	22	18114735	T/C	153241	1502550	64	GWAS common	0.333	0.961538	1.0306	1.04948	-0.0392207	0.00463044
UBE2L3	22	21574308	G/C	158016	1201370	62	GWAS common	0.232	1.04	1.02791	1.05223	0.0392207	0.00596609
SMARCB1	22	23827009	G/C	158269	1204070	64	GWAS common	0.231	1.03	1.01976	1.04035	0.0295588	0.00509918
MYO18B	22	25763322	A/G	178692	1628850	64	GWAS common	0.462	1.04	1.03026	1.04983	0.0392207	0.00479909
SMTN	22	31093589	G/A	166042	1471170	53	GWAS common	0.144	0.961538	1.02669	1.05348	-0.0392207	0.0065717
CBX6	22	38870446	A/C	178465	1625830	62	GWAS common	0.233	1.04	1.02775	1.0524	0.0392207	0.0060453
MEI1	22	41798557	G/A	178892	1630840	65	GWAS common	0.328	0.970874	1.02032	1.03977	-0.0295588	0.00481797
SCN5A p.T220I	3	38613787	A/G	55883	568912	3	GWAS low-freq	0.0031	0.57	0.470613	0.690376	-0.562119	0.0977552
MYZAP p.Q254P	15	57632516	C/A	104006	1097720	8	GWAS low-freq	0.0083	1.37	1.27193	1.47563	0.314811	0.0378945
RPL3L c.1167+1G>T	16	1945498	T/C	76572	888883	5	GWAS low-freq	0.0045	1.51	1.34134	1.69987	0.41211	0.0604289
Abbreviations: Chr, chromosome; BP, basepair position on chromosome; RA_NRA, reference allele and non-reference allele; N, number; AF, atrial fibrillation; MAF, minor allele frequency; OR_minor, odds ratio of the minor allele; CI_lower, lower-bound of the 95% confidence interval; CI_upper; upper-bound of the 95% confidence interval; BETA_minor, regression beta coefficient of the minor allele; SE,…

## Sheet: ST6 GenePrio vs RVAS curation
Supplementary Table 6: GenePrio GWAS prioritization and RVAS results for all genes
Gene ENSEMBL ID	Gene Name	In GWAS locus?	GenePrio						RVAS
			MAGMA	PoPs	eQTL	snRNA	Coding	Score Sum	Analysis group	Cauchy P-value	Cauchy P-value (MAF<0.1% only)
ENSG00000000419	DPM1	NO	NA	NA	NA	NA	NA	NA	both_sexes	0.0141853	0.00992012
ENSG00000000457	SCYL3	YES	1	0	0	0	0	1	both_sexes	0.569328	0.494524
ENSG00000000460	FIRRM	NO	NA	NA	NA	NA	NA	NA	both_sexes	0.666157	0.547891
ENSG00000000938	FGR	NO	NA	NA	NA	NA	NA	NA	both_sexes	0.775219	0.795299
ENSG00000000971	CFH	NO	NA	NA	NA	NA	NA	NA	both_sexes	0.110678	0.0802289
ENSG00000001036	FUCA2	NO	NA	NA	NA	NA	NA	NA	both_sexes	0.359154	0.516948
ENSG00000001084	GCLC	NO	NA	NA	NA	NA	NA	NA	both_sexes	0.405075	0.405777
ENSG00000001167	NFYA	NO	NA	NA	NA	NA	NA	NA	both_sexes	0.865036	0.822435
ENSG00000001460	STPG1	NO	NA	NA	NA	NA	NA	NA	both_sexes	0.264911	0.566772
ENSG00000001461	NIPAL3	NO	NA	NA	NA	NA	NA	NA	both_sexes	0.957707	0.942269
ENSG00000001561	ENPP4	NO	NA	NA	NA	NA	NA	NA	both_sexes	0.267055	0.780944
ENSG00000001617	SEMA3F	NO	NA	NA	NA	NA	NA	NA	both_sexes	0.0445944	0.0584325
ENSG00000001626	CFTR	NO	NA	NA	NA	NA	NA	NA	both_sexes	0.106445	0.151474
ENSG00000001629	ANKIB1	YES	0	0	0	0	0	0	both_sexes	0.988627	0.98568
ENSG00000001630	CYP51A1	NO	NA	NA	NA	NA	NA	NA	both_sexes	0.981858	0.98721
ENSG00000001631	KRIT1	YES	0	0	0	0	0	0	both_sexes	0.238254	0.211506
ENSG00000002016	RAD52	NO	NA	NA	NA	NA	NA	NA	both_sexes	0.610015	0.621428
ENSG00000002330	BAD	NO	NA	NA	NA	NA	NA	NA	both_sexes	0.558043	0.51792
ENSG00000002549	LAP3	NO	NA	NA	NA	NA	NA	NA	both_sexes	0.719785	0.777246
ENSG00000002586	CD99	NO	NA	NA	NA	NA	NA	NA	both_sexes	0.1057	0.1057
ENSG00000002587	HS3ST1	NO	NA	NA	NA	NA	NA	NA	both_sexes	0.697183	0.730663
ENSG00000002726	AOC1	YES	1	0	0	0	0	1	both_sexes	0.295065	0.316604
ENSG00000002745	WNT16	NO	NA	NA	NA	NA	NA	NA	both_sexes	0.976521	0.969613
ENSG00000002746	HECW1	NO	NA	NA	NA	NA	NA	NA	both_sexes	0.552798	0.645267
ENSG00000002822	MAD1L1	NO	NA	NA	NA	NA	NA	NA	both_sexes	0.962059	0.945213
ENSG00000002834	LASP1	NO	NA	NA	NA	NA	NA	NA	both_sexes	0.418625	0.385931
ENSG00000002919	SNX11	NO	NA	NA	NA	NA	NA	NA	both_sexes	0.644198	0.673004
ENSG00000002933	TMEM176A	YES	0	0	0	0	0	0	both_sexes	0.799576	0.645234
ENSG00000003056	M6PR	NO	NA	NA	NA	NA	NA	NA	both_sexes	0.941501	0.95523
ENSG00000003137	CYP26B1	NO	NA	NA	NA	NA	NA	NA	both_sexes	0.364417	0.396093
ENSG00000003147	ICA1	NO	NA	NA	NA	NA	NA	NA	both_sexes	0.442432	0.530801
ENSG00000003249	DBNDD1	NO	NA	NA	NA	NA	NA	NA	both_sexes	0.79451	0.753257
ENSG00000003393	ALS2	NO	NA	NA	NA	NA	NA	NA	both_sexes	0.846668	0.894337
ENSG00000003400	CASP10	NO	NA	NA	NA	NA	NA	NA	both_sexes	0.00865832	0.00567068
ENSG00000003402	CFLAR	NO	NA	NA	NA	NA	NA	NA	both_sexes	0.698625	0.613853
ENSG00000003436	TFPI	NO	NA	NA	NA	NA	NA	NA	both_sexes	0.875878	0.897137
ENSG00000003509	NDUFAF7	NO	NA	NA	NA	NA	NA	NA	both_sexes	0.12748	0.0769577
ENSG00000003756	RBM5	NO	NA	NA	NA	NA	NA	NA	both_sexes	0.77513	0.351614
ENSG00000003987	MTMR7	NO	NA	NA	NA	NA	NA	NA	both_sexes	0.870556	0.901054
ENSG00000003989	SLC7A2	NO	NA	NA	NA	NA	NA	NA	both_sexes	0.0210405	0.202615
ENSG00000004059	ARF5	NO	NA	NA	NA	NA	NA	NA	both_sexes	0.126841	0.153499
ENSG00000004139	SARM1	NO	NA	NA	NA	NA	NA	NA	both_sexes	0.0306342	0.0199599
ENSG00000004142	POLDIP2	NO	NA	NA	NA	NA	NA	NA	both_sexes	0.911808	0.925894
ENSG00000004399	PLXND1	YES	0	0	0	0	0	0	both_sexes	0.84207	0.869628
ENSG00000004455	AK2	NO	NA	NA	NA	NA	NA	NA	both_sexes	0.895098	0.894249
ENSG00000004468	CD38	NO	NA	NA	NA	NA	NA	NA	both_sexes	0.967772	0.982599
ENSG00000004478	FKBP4	NO	NA	NA	NA	NA	NA	NA	both_sexes	0.812181	0.823416
ENSG00000004487	KDM1A	YES	0	0	0	0	0	0	both_sexes	0.766816	0.775564
ENSG00000004534	RBM6	NO	NA	NA	NA	NA	NA	NA	both_sexes	0.938936	0.924103
ENSG00000004660	CAMKK1	YES	0	0	0	0	0	0	both_sexes	0.667592	0.637144
ENSG00000004700	RECQL	NO	NA	NA	NA	NA	NA	NA	both_sexes	0.448036	0.523553
ENSG00000004766	VPS50	NO	NA	NA	NA	NA	NA	NA	both_sexes	0.821907	0.87012
ENSG00000004776	HSPB6	YES	0	0	0	0	0	0	both_sexes	0.492862	0.703962
ENSG00000004777	ARHGAP33	YES	0	0	0	0	0	0	both_sexes	0.0182676	0.0153042
ENSG00000004779	NDUFAB1	NO	NA	NA	NA	NA	NA	NA	both_sexes	0.118847	0.133138
ENSG00000004799	PDK4	NO	NA	NA	NA	NA	NA	NA	both_sexes	0.471368	0.355458
ENSG00000004809	SLC22A16	NO	NA	NA	NA	NA	NA	NA	both_sexes	0.859692	0.893456
ENSG00000004838	ZMYND10	NO	NA	NA	NA	NA	NA	NA	both_sexes	0.166553	0.129506
ENSG00000004846	ABCB5	NO	NA	NA	NA	NA	NA	NA	both_sexes	0.745732	0.766561
ENSG00000004864	SLC25A13	NO	NA	NA	NA	NA	NA	NA	both_sexes	0.0225582	0.0163399
ENSG00000004866	ST7	YES	0	0	0	1	0	1	both_sexes	0.728874	0.806233
ENSG00000004897	CDC27	YES	0	0	0	0	0	0	both_sexes	0.991035	0.989
ENSG00000004939	SLC4A1	NO	NA	NA	NA	NA	NA	NA	both_sexes	0.539777	0.753704
ENSG00000004948	CALCR	NO	NA	NA	NA	NA	NA	NA	both_sexes	0.553687	0.744324
ENSG00000004975	DVL2	YES	0	0	0	0	0	0	both_sexes	0.632834	0.609375
ENSG00000005001	PRSS22	NO	NA	NA	NA	NA	NA	NA	both_sexes	0.558629	0.554223
ENSG00000005007	UPF1	NO	NA	NA	NA	NA	NA	NA	both_sexes	0.751695	0.749975
ENSG00000005020	SKAP2	NO	NA	NA	NA	NA	NA	NA	both_sexes	0.545939	0.462465
ENSG00000005059	MCUB	YES	0	0	0	0	0	0	both_sexes	0.00227917	0.0015154
ENSG00000005073	HOXA11	YES	0	0	0	0	0	0	both_sexes	0.208369	0.262044
ENSG00000005075	POLR2J	NO	NA	NA	NA	NA	NA	NA	both_sexes	0.870161	0.878847
ENSG00000005100	DHX33	NO	NA	NA	NA	NA	NA	NA	both_sexes	0.325418	0.315196
ENSG00000005102	MEOX1	NO	NA	NA	NA	NA	NA	NA	both_sexes	0.601575	0.783306
ENSG00000005108	THSD7A	NO	NA	NA	NA	NA	NA	NA	both_sexes	0.606585	0.61238
ENSG00000005156	LIG3	NO	NA	NA	NA	NA	NA	NA	both_sexes	0.530568	0.525209
ENSG00000005175	RPAP3	NO	NA	NA	NA	NA	NA	NA	both_sexes	0.614191	0.557805
ENSG00000005187	ACSM3	NO	NA	NA	NA	NA	NA	NA	both_sexes	0.665829	0.486758
ENSG00000005189	REXO5	NO	NA	NA	NA	NA	NA	NA	both_sexes	0.717686	0.681662
ENSG00000005194	CIAPIN1	NO	NA	NA	NA	NA	NA	NA	both_sexes	0.356877	0.28104
ENSG00000005206	SPPL2B	YES	0	0	0	0	0	0	both_sexes	0.010225	0.0120721
ENSG00000005238	ATOSB	NO	NA	NA	NA	NA	NA	NA	both_sexes	0.688388	0.640912
ENSG00000005243	COPZ2	NO	NA	NA	NA	NA	NA	NA	both_sexes	0.153825	0.180492
ENSG00000005249	PRKAR2B	YES	0	0	0	0	0	0	both_sexes	0.517712	0.569816
ENSG00000005339	CREBBP	YES	0	1	0	0	0	1	both_sexes	0.791536	0.7381
ENSG00000005379	TSPOAP1	NO	NA	NA	NA	NA	NA	NA	both_sexes	0.0167793	0.0177269
ENSG00000005381	MPO	NO	NA	NA	NA	NA	NA	NA	both_sexes	0.818123	0.864347
ENSG00000005421	PON1	NO	NA	NA	NA	NA	NA	NA	both_sexes	0.321456	0.510268
ENSG00000005436	GCFC2	NO	NA	NA	NA	NA	NA	NA	both_sexes	0.0382077	0.0419859
ENSG00000005448	WDR54	NO	NA	NA	NA	NA	NA	NA	both_sexes	0.662784	0.599555
ENSG00000005469	CROT	NO	NA	NA	NA	NA	NA	NA	both_sexes	0.291647	0.310046
ENSG00000005471	ABCB4	NO	NA	NA	NA	NA	NA	NA	both_sexes	0.918663	0.877243
ENSG00000005483	KMT2E	NO	NA	NA	NA	NA	NA	NA	both_sexes	0.499253	0.622112
ENSG00000005486	RHBDD2	YES	0	0	0	0	0	0	both_sexes	0.298017	0.320703
ENSG00000005513	SOX8	YES	0	0	0	0	0	0	both_sexes	0.305998	0.26966
ENSG00000005700	IBTK	NO	NA	NA	NA	NA	NA	NA	both_sexes	0.909134	0.900653
ENSG00000005801	ZNF195	NO	NA	NA	NA	NA	NA	NA	both_sexes	0.102559	0.305104
ENSG00000005810	MYCBP2	NO	NA	NA	NA	NA	NA	NA	both_sexes	0.988327	0.985604
ENSG00000005812	FBXL3	NO	NA	NA	NA	NA	NA	NA	both_sexes	0.0450534	0.0562238
ENSG00000005844	ITGAL	YES	0	0	0	0	0	0	both_sexes	0.0553885	0.061374
ENSG00000005882	PDK2	NO	NA	NA	NA	NA	NA	NA	both_sexes	0.642135	0.61049
ENSG00000005884	ITGA3	NO	NA	NA	NA	NA	NA	NA	both_sexes	0.719624	0.572286
ENSG00000005961	ITGA2B	NO	NA	NA	NA	NA	NA	NA	both_sexes	0.910517	0.897018
ENSG00000005981	ASB4	NO	NA	NA	NA	NA	NA	NA	both_sexes	0.978434	0.971981
ENSG00000006007	GDE1	NO	NA	NA	NA	NA	NA	NA	both_sexes	0.969586	0.962579
ENSG00000006015	REX1BD	NO	NA	NA	NA	NA	NA	NA	both_sexes	0.227217	0.237965
ENSG00000006016	CRLF1	NO	NA	NA	NA	NA	NA	NA	both_sexes	0.0308723	0.0349612
ENSG00000006025	OSBPL7	NO	NA	NA	NA	NA	NA	NA	both_sexes	0.85717	0.802845
ENSG00000006042	TMEM98	NO	NA	NA	NA	NA	NA	NA	both_sexes	0.803891	0.771166
ENSG00000006047	YBX2	YES	0	0	0	0	0	0	both_sexes	0.143952	0.127691
ENSG00000006059	KRT33A	NO	NA	NA	NA	NA	NA	NA	both_sexes	0.745042	0.683909
ENSG00000006062	MAP3K14	YES	0	0	0	0	0	0	both_sexes	0.19339	0.198954
ENSG00000006071	ABCC8	NO	NA	NA	NA	NA	NA	NA	both_sexes	0.301394	0.37656
ENSG00000006116	CACNG3	NO	NA	NA	NA	NA	NA	NA	both_sexes	0.448809	0.337462
ENSG00000006118	TMEM132A	NO	NA	NA	NA	NA	NA	NA	both_sexes	0.897077	0.873133
ENSG00000006125	AP2B1	NO	NA	NA	NA	NA	NA	NA	both_sexes	0.522715	0.528866
ENSG00000006128	TAC1	NO	NA	NA	NA	NA	NA	NA	both_sexes	0.916784	0.915981
ENSG00000006194	ZNF263	YES	0	0	0	0	0	0	both_sexes	0.0151093	0.0184518
ENSG00000006210	CX3CL1	NO	NA	NA	NA	NA	NA	NA	both_sexes	0.796714	0.848703
ENSG00000006282	SPATA20	NO	NA	NA	NA	NA	NA	NA	both_sexes	0.306193	0.229665
ENSG00000006283	CACNA1G	NO	NA	NA	NA	NA	NA	NA	both_sexes	0.33974	0.273971
ENSG00000006327	TNFRSF12A	NO	NA	NA	NA	NA	NA	NA	both_sexes	0.991391	0.987724
ENSG00000006377	DLX6	NO	NA	NA	NA	NA	NA	NA	both_sexes	0.784793	0.828947
ENSG00000006432	MAP3K9	NO	NA	NA	NA	NA	NA	NA	both_sexes	0.652307	0.235633
ENSG00000006451	RALA	NO	NA	NA	NA	NA	NA	NA	both_sexes	0.708327	0.679126
ENSG00000006453	BAIAP2L1	NO	NA	NA	NA	NA	NA	NA	both_sexes	0.617728	0.73635
ENSG00000006459	KDM7A	NO	NA	NA	NA	NA	NA	NA	both_sexes	0.324864	0.359556
ENSG00000006468	ETV1	YES	0	0	0	1	0	1	both_sexes	0.908331	0.877545
ENSG00000006530	AGK	NO	NA	NA	NA	NA	NA	NA	both_sexes	0.780599	0.865518
ENSG00000006534	ALDH3B1	NO	NA	NA	NA	NA	NA	NA	both_sexes	0.944373	0.96242
ENSG00000006555	TTC22	NO	NA	NA	NA	NA	NA	NA	both_sexes	0.856557	0.87777
ENSG00000006576	PHTF2	YES	1	0	0	0	0	1	both_sexes	0.64901	0.685158
ENSG00000006606	CCL26	YES	0	0	0	0	0	0	both_sexes	0.638733	0.648116
ENSG00000006607	FARP2	NO	NA	NA	NA	NA	NA	NA	both_sexes	0.0643067	0.0664283
ENSG00000006611	USH1C	NO	NA	NA	NA	NA	NA	NA	both_sexes	0.816391	0.826085
ENSG00000006625	GGCT	NO	NA	NA	NA	NA	NA	NA	both_sexes	0.224709	0.196479
ENSG00000006634	DBF4	NO	NA	NA	NA	NA	NA	NA	both_sexes	0.705749	0.701759
ENSG00000006638	TBXA2R	NO	NA	NA	NA	NA	NA	NA	both_sexes	0.387056	0.546201
ENSG00000006652	IFRD1	NO	NA	NA	NA	NA	NA	NA	both_sexes	0.495786	0.552547
ENSG00000006659	LGALS14	NO	NA	NA	NA	NA	NA	NA	both_sexes	0.248356	0.822752
ENSG00000006695	COX10	NO	NA	NA	NA	NA	NA	NA	both_sexes	0.318647	0.20895
ENSG00000006704	GTF2IRD1	YES	0	0	0	1	0	1	both_sexes	0.84435	0.745684
ENSG00000006712	PAF1	NO	NA	NA	NA	NA	NA	NA	both_sexes	0.143225	0.11017
ENSG00000006715	VPS41	NO	NA	NA	NA	NA	NA	NA	both_sexes	0.0758423	0.0966069
ENSG00000006740	ARHGAP44	YES	0	0	0	0	0	0	both_sexes	0.718799	0.632853
ENSG00000006744	ELAC2	YES	0	0	0	0	0	0	both_sexes	0.295239	0.66225
ENSG00000006747	SCIN	NO	NA	NA	NA	NA	NA	NA	both_sexes	0.974383	0.970379
ENSG00000006788	MYH13	NO	NA	NA	NA	NA	NA	NA	both_sexes	0.879716	0.906721
ENSG00000006831	ADIPOR2	NO	NA	NA	NA	NA	NA	NA	both_sexes	0.962755	0.966491
ENSG00000006837	CDKL3	NO	NA	NA	NA	NA	NA	NA	both_sexes	0.711219	0.732215
ENSG00000007001	UPP2	NO	NA	NA	NA	NA	NA	NA	both_sexes	0.738032	0.790657
ENSG00000007038	PRSS21	NO	NA	NA	NA	NA	NA	NA	both_sexes	0.190663	0.0913523
ENSG00000007047	MARK4	YES	0	0	0	0	0	0	both_sexes	0.242617	0.252944
ENSG00000007062	PROM1	NO	NA	NA	NA	NA	NA	NA	both_sexes	0.964611	0.167832
ENSG00000007080	CCDC124	NO	NA	NA	NA	NA	NA	NA	both_sexes	0.850183	0.584114
ENSG00000007129	CEACAM21	NO	NA	NA	NA	NA	NA	NA	both_sexes	0.624891	0.71701
ENSG00000007168	PAFAH1B1	YES	0	0	0	0	0	0	both_sexes	0.348597	0.310351
ENSG00000007171	NOS2	NO	NA	NA	NA	NA	NA	NA	both_sexes	0.852102	0.901021
ENSG00000007174	DNAH9	NO	NA	NA	NA	NA	NA	NA	both_sexes	0.403682	0.411066
ENSG00000007202	BLTP2	NO	NA	NA	NA	NA	NA	NA	both_sexes	0.415982	0.688579
ENSG00000007216	SLC13A2	NO	NA	NA	NA	NA	NA	NA	both_sexes	0.548525	0.63361
ENSG00000007237	GAS7	NO	NA	NA	NA	NA	NA	NA	both_sexes	0.78919	0.741285
ENSG00000007255	TRAPPC6A	YES	0	0	0	0	0	0	both_sexes	0.910149	0.93861
ENSG00000007264	MATK	NO	NA	NA	NA	NA	NA	NA	both_sexes	0.130534	0.0700705
ENSG00000007306	CEACAM7	NO	NA	NA	NA	NA	NA	NA	both_sexes	0.948782	0.963676
ENSG00000007312	CD79B	NO	NA	NA	NA	NA	NA	NA	both_sexes	0.586738	0.791263
ENSG00000007314	SCN4A	NO	NA	NA	NA	NA	NA	NA	both_sexes	0.738673	0.734996
ENSG00000007341	ST7L	NO	NA	NA	NA	NA	NA	NA	both_sexes	0.176984	0.555797
ENSG00000007372	PAX6	NO	NA	NA	NA	NA	NA	NA	both_sexes	0.609905	0.761849
ENSG00000007376	RPUSD1	YES	0	0	0	0	0	0	both_sexes	0.417563	0.416033
ENSG00000007384	RHBDF1	NO	NA	NA	NA	NA	NA	NA	both_sexes	0.86862	0.740221
ENSG00000007392	LUC7L	NO	NA	NA	NA	NA	NA	NA	both_sexes	0.934522	0.872554
ENSG00000007402	CACNA2D2	NO	NA	NA	NA	NA	NA	NA	both_sexes	0.52839	0.480177
ENSG00000007516	BAIAP3	NO	NA	NA	NA	NA	NA	NA	both_sexes	0.890827	0.922844
ENSG00000007520	TSR3	NO	NA	NA	NA	NA	NA	NA	both_sexes	0.0126982	0.00861833
ENSG00000007541	PIGQ	YES	0	0	0	0	0	0	both_sexes	0.200125	0.200681
ENSG00000007545	CRAMP1	YES	0	0	0	0	0	0	both_sexes	0.426779	0.4267
ENSG00000007866	TEAD3	NO	NA	NA	NA	NA	NA	NA	both_sexes	0.738182	0.721666
ENSG00000007908	SELE	YES	1	0	0	0	0	1	both_sexes	0.789571	0.882222
ENSG00000007923	DNAJC11	NO	NA	NA	NA	NA	NA	NA	both_sexes	0.784896	0.52426
ENSG00000007933	FMO3	YES	0	0	0	0	0	0	both_sexes	0.645271	0.731909
ENSG00000007944	MYLIP	YES	0	0	0	0	0	0	both_sexes	0.277868	0.332203
ENSG00000007968	E2F2	YES	0	0	0	0	0	0	both_sexes	0.440318	0.43094
ENSG00000008018	PSMB1	NO	NA	NA	NA	NA	NA	NA	both_sexes	0.847422	0.792486
ENSG00000008083	JARID2	NO	NA	NA	NA	NA	NA	NA	both_sexes	0.0329544	0.051222
ENSG00000008118	CAMK1G	NO	NA	NA	NA	NA	NA	NA	both_sexes	0.422839	0.420287
ENSG00000008128	CDK11A	NO	NA	NA	NA	NA	NA	NA	both_sexes	0.514191	0.21582
ENSG00000008130	NADK	NO	NA	NA	NA	NA	NA	NA	both_sexes	0.0115009	0.0150385
ENSG00000008196	TFAP2B	NO	NA	NA	NA	NA	NA	NA	both_sexes	0.547742	0.57745
ENSG00000008197	TFAP2D	NO	NA	NA	NA	NA	NA	NA	both_sexes	0.790095	0.807432
ENSG00000008226	DLEC1	YES	0	0	0	0	0	0	both_sexes	0.907729	0.94063
ENSG00000008256	CYTH3	NO	NA	NA	NA	NA	NA	NA	both_sexes	0.889764	0.932959
ENSG00000008277	ADAM22	NO	NA	NA	NA	NA	NA	NA	both_sexes	0.399817	0.42031
ENSG00000008282	SYPL1	YES	0	0	0	0	0	0	both_sexes	0.518565	0.425999
ENSG00000008283	CYB561	NO	NA	NA	NA	NA	NA	NA	both_sexes	0.256889	0.197834
ENSG00000008294	SPAG9	NO	NA	NA	NA	NA	NA	NA	both_sexes	0.833878	0.872398
ENSG00000008300	CELSR3	NO	NA	NA	NA	NA	NA	NA	both_sexes	0.252992	0.333001
ENSG00000008311	AASS	NO	NA	NA	NA	NA	NA	NA	both_sexes	0.029221	0.0219159
ENSG00000008323	PLEKHG6	NO	NA	NA	NA	NA	NA	NA	both_sexes	0.923506	0.91898
ENSG00000008324	SS18L2	NO	NA	NA	NA	NA	NA	NA	both_sexes	0.7782	0.771333
ENSG00000008382	MPND	NO	NA	NA	NA	NA	NA	NA	both_sexes	0.955503	0.965866
ENSG00000008394	MGST1	NO	NA	NA	NA	NA	NA	NA	both_sexes	0.958485	0.95685
ENSG00000008405	CRY1	YES	0	0	0	0	0	0	both_sexes	0.697711	0.688372
ENSG00000008438	PGLYRP1	NO	NA	NA	NA	NA	NA	NA	both_sexes	0.865037	0.903157
ENSG00000008441	NFIX	NO	NA	NA	NA	NA	NA	NA	both_sexes	0.0711955	0.0485575
ENSG00000008513	ST3GAL1	NO	NA	NA	NA	NA	NA	NA	both_sexes	0.846281	0.814478
ENSG00000008516	MMP25	NO	NA	NA	NA	NA	NA	NA	both_sexes	0.9505	0.936997
ENSG00000008517	IL32	NO	NA	NA	NA	NA	NA	NA	both_sexes	0.627138	0.586179
ENSG00000008710	PKD1	YES	1	0	0	0	0	1	both_sexes	0.000184246	0.000122802
ENSG00000008735	MAPK8IP2	NO	NA	NA	NA	NA	NA	NA	both_sexes	0.934145	0.964302
ENSG00000008838	MED24	YES	0	0	0	0	0	0	both_sexes	0.996663	0.764439
ENSG00000008853	RHOBTB2	NO	NA	NA	NA	NA	NA	NA	both_sexes	0.0870308	0.128678
ENSG00000008869	HEATR5B	NO	NA	NA	NA	NA	NA	NA	both_sexes	0.0928408	0.121796
ENSG00000008952	SEC62	NO	NA	NA	NA	NA	NA	NA	both_sexes	0.240657	0.188455
ENSG00000008988	RPS20	NO	NA	NA	NA	NA	NA	NA	both_sexes	0.0829734	0.0975925
ENSG00000009307	CSDE1	NO	NA	NA	NA	NA	NA	NA	both_sexes	0.987744	0.985017
ENSG00000009335	UBE3C	NO	NA	NA	NA	NA	NA	NA	both_sexes	0.769953	0.779206
ENSG00000009413	REV3L	NO	NA	NA	NA	NA	NA	NA	both_sexes	0.84924	0.822171
ENSG00000009709	PAX7	NO	NA	NA	NA	NA	NA	NA	both_sexes	0.755879	0.767241
ENSG00000009724	MASP2	YES	0	0	0	0	0	0	both_sexes	0.00868428	0.00621186
ENSG00000009765	IYD	NO	NA	NA	NA	NA	NA	NA	both_sexes	0.617774	0.673443
ENSG00000009780	FAM76A	NO	NA	NA	NA	NA	NA	NA	both_sexes	0.564056	0.585921
ENSG00000009790	TRAF3IP3	NO	NA	NA	NA	NA	NA	NA	both_sexes	0.0813864	0.0686484
ENSG00000009830	POMT2	YES	0	0	0	0	0	0	both_sexes	0.74169	0.791487
ENSG00000009844	VTA1	NO	NA	NA	NA	NA	NA	NA	both_sexes	0.205232	0.130755
ENSG00000009950	MLXIPL	NO	NA	NA	NA	NA	NA	NA	both_sexes	0.496235	0.507726
ENSG00000009954	BAZ1B	NO	NA	NA	NA	NA	NA	NA	both_sexes	0.974112	0.965165
ENSG00000010017	RANBP9	NO	NA	NA	NA	NA	NA	NA	both_sexes	0.943873	0.926646
ENSG00000010030	ETV7	YES	0	0	0	0	0	0	both_sexes	0.900951	0.899338
ENSG00000010072	SPRTN	NO	NA	NA	NA	NA	NA	NA	both_sexes	0.908441	0.897662
ENSG00000010165	METTL13	NO	NA	NA	NA	NA	NA	NA	both_sexes	0.983144	0.803498
ENSG00000010219	DYRK4	YES	0	0	0	0	0	0	both_sexes	0.769803	0.760389
ENSG00000010244	ZNF207	NO	NA	NA	NA	NA	NA	NA	both_sexes	0.729177	0.783419
ENSG00000010256	UQCRC1	NO	NA	NA	NA	NA	NA	NA	both_sexes	0.110587	0.0907326
ENSG00000010270	STARD3NL	NO	NA	NA	NA	NA	NA	NA	both_sexes	0.986914	0.991459
ENSG00000010278	CD9	NO	NA	NA	NA	NA	NA	NA	both_sexes	0.249769	0.127677
ENSG00000010282	HHATL	NO	NA	NA	NA	NA	NA	NA	both_sexes	0.165175	0.149397
ENSG00000010292	NCAPD2	NO	NA	NA	NA	NA	NA	NA	both_sexes	0.711561	0.788418
ENSG00000010295	IFFO1	NO	NA	NA	NA	NA	NA	NA	both_sexes	0.807384	0.798223
ENSG00000010310	GIPR	NO	NA	NA	NA	NA	NA	NA	both_sexes	0.876155	0.287427
ENSG00000010318	PHF7	NO	NA	NA	NA	NA	NA	NA	both_sexes	0.811276	0.746799
ENSG00000010319	SEMA3G	NO	NA	NA	NA	NA	NA	NA	both_sexes	0.476495	0.480961
ENSG00000010322	NISCH	NO	NA	NA	NA	NA	NA	NA	both_sexes	0.0163395	0.010892
ENSG00000010327	STAB1	NO	NA	NA	NA	NA	NA	NA	both_sexes	0.769682	0.74511
ENSG00000010361	FUZ	NO	NA	NA	NA	NA	NA	NA	both_sexes	0.95195	0.664506
ENSG00000010379	SLC6A13	NO	NA	NA	NA	NA	NA	NA	both_sexes	0.11809	0.0692916
ENSG00000010438	PRSS3	NO	NA	NA	NA	NA	NA	NA	both_sexes	0.517278	0.647629
ENSG00000010539	ZNF200	NO	NA	NA	NA	NA	NA	NA	both_sexes	0.473963	0.636441
ENSG00000010610	CD4	NO	NA	NA	NA	NA	NA	NA	both_sexes	0.0480365	0.0586388
ENSG00000010626	LRRC23	NO	NA	NA	NA	NA	NA	NA	both_sexes	0.623566	0.784951
ENSG00000010704	HFE	NO	NA	NA	NA	NA	NA	NA	both_sexes	0.670595	0.740879
ENSG00000010803	SCMH1	YES	1	0	1	1	0	3	both_sexes	7.21221e-05	0.5347
ENSG00000010810	FYN	NO	NA	NA	NA	NA	NA	NA	both_sexes	0.876497	0.899414
ENSG00000010818	HIVEP2	NO	NA	NA	NA	NA	NA	NA	both_sexes	0.824271	0.818563
ENSG00000010932	FMO1	NO	NA	NA	NA	NA	NA	NA	both_sexes	0.556741	0.591052
ENSG00000011007	ELOA	YES	0	0	0	0	0	0	both_sexes	0.401795	0.458992
ENSG00000011009	LYPLA2	YES	0	0	0	0	0	0	both_sexes	0.766382	0.762354
ENSG00000011021	CLCN6	YES	0	0	0	0	0	0	both_sexes	0.48661	0.322061
ENSG00000011028	MRC2	NO	NA	NA	NA	NA	NA	NA	both_sexes	0.0203611	0.0252537
ENSG00000011052	NME1-NME2	NO	NA	NA	NA	NA	NA	NA	both_sexes	0.531881	0.601889
ENSG00000011083	SLC6A7	NO	NA	NA	NA	NA	NA	NA	both_sexes	0.0737734	0.0543131
ENSG00000011105	TSPAN9	NO	NA	NA	NA	NA	NA	NA	both_sexes	0.0546017	0.0705524
ENSG00000011114	BTBD7	NO	NA	NA	NA	NA	NA	NA	both_sexes	0.288815	0.389744
ENSG00000011132	APBA3	NO	NA	NA	NA	NA	NA	NA	both_sexes	0.145364	0.283193
ENSG00000011143	MKS1	NO	NA	NA	NA	NA	NA	NA	both_sexes	0.839821	0.794873
ENSG00000011198	ABHD5	NO	NA	NA	NA	NA	NA	NA	both_sexes	0.533372	0.482412
ENSG00000011243	AKAP8L	NO	NA	NA	NA	NA	NA	NA	both_sexes	0.728592	0.793023
ENSG00000011258	MBTD1	NO	NA	NA	NA	NA	NA	NA	both_sexes	0.255802	0.239485
ENSG00000011260	UTP18	NO	NA	NA	NA	NA	NA	NA	both_sexes	0.672924	0.647519
ENSG00000011275	RNF216	NO	NA	NA	NA	NA	NA	NA	both_sexes	0.68941	0.703823
ENSG00000011295	TTC19	NO	NA	NA	NA	NA	NA	NA	both_sexes	0.758126	0.732423
ENSG00000011304	PTBP1	NO	NA	NA	NA	NA	NA	NA	both_sexes	0.0397265	0.0419175
ENSG00000011332	DPF1	NO	NA	NA	NA	NA	NA	NA	both_sexes	0.458237	0.707808
ENSG00000011347	SYT7	NO	NA	NA	NA	NA	NA	NA	both_sexes	0.146311	0.129752
ENSG00000011376	LARS2	NO	NA	NA	NA	NA	NA	NA	both_sexes	0.0916237	0.0861222
ENSG00000011405	PIK3C2A	NO	NA	NA	NA	NA	NA	NA	both_sexes	0.332633	0.347012
ENSG00000011422	PLAUR	NO	NA	NA	NA	NA	NA	NA	both_sexes	0.846944	0.868674
ENSG00000011426	ANLN	NO	NA	NA	NA	NA	NA	NA	both_sexes	0.521243	0.598639
ENSG00000011451	WIZ	NO	NA	NA	NA	NA	NA	NA	both_sexes	0.488685	0.459511
ENSG00000011454	RABGAP1	NO	NA	NA	NA	NA	NA	NA	both_sexes	0.357611	0.398443
ENSG00000011465	DCN	NO	NA	NA	NA	NA	NA	NA	both_sexes	0.925143	0.93968
ENSG00000011478	QPCTL	NO	NA	NA	NA	NA	NA	NA	both_sexes	0.734152	0.606379
ENSG00000011485	PPP5C	NO	NA	NA	NA	NA	NA	NA	both_sexes	0.00680608	0.00499057
ENSG00000011523	CEP68	YES	1	0	1	0	0	2	both_sexes	0.39859	0.513828
ENSG00000011566	MAP4K3	NO	NA	NA	NA	NA	NA	NA	both_sexes	0.735302	0.713665
ENSG00000011590	ZBTB32	YES	0	0	0	0	0	0	both_sexes	0.596972	0.520945
ENSG00000011600	TYROBP	YES	0	0	0	0	0	0	both_sexes	0.0280542	0.0185184
ENSG00000011638	LDAF1	NO	NA	NA	NA	NA	NA	NA	both_sexes	0.144803	0.0936608
ENSG00000012048	BRCA1	NO	NA	NA	NA	NA	NA	NA	both_sexes	0.881398	0.871387
ENSG00000012061	ERCC1	NO	NA	NA	NA	NA	NA	NA	both_sexes	0.302945	0.384129
ENSG00000012124	CD22	NO	NA	NA	NA	NA	NA	NA	both_sexes	0.371166	0.43579
ENSG00000012171	SEMA3B	NO	NA	NA	NA	NA	NA	NA	both_sexes	0.952547	0.969441
ENSG00000012223	LTF	NO	NA	NA	NA	NA	NA	NA	both_sexes	0.794065	0.865323
ENSG00000012232	EXTL3	NO	NA	NA	NA	NA	NA	NA	both_sexes	0.622448	0.657232
ENSG00000012504	NR1H4	NO	NA	NA	NA	NA	NA	NA	both_sexes	0.177376	0.119365
ENSG00000012660	ELOVL5	NO	NA	NA	NA	NA	NA	NA	both_sexes	0.996313	0.996258
ENSG00000012779	ALOX5	NO	NA	NA	NA	NA	NA	NA	both_sexes	0.510419	0.509206
ENSG00000012822	CALCOCO1	NO	NA	NA	NA	NA	NA	NA	both_sexes	0.959564	0.677731
ENSG00000012963	UBR7	NO	NA	NA	NA	NA	NA	NA	both_sexes	0.889478	0.701956
ENSG00000012983	MAP4K5	NO	NA	NA	NA	NA	NA	NA	both_sexes	0.438994	0.445435
ENSG00000013016	EHD3	NO	NA	NA	NA	NA	NA	NA	both_sexes	0.687098	0.689014
ENSG00000013275	PSMC4	NO	NA	NA	NA	NA	NA	NA	both_sexes	0.418935	0.41324
ENSG00000013288	MAN2B2	NO	NA	NA	NA	NA	NA	NA	both_sexes	0.88348	0.905134
ENSG00000013293	SLC7A14	NO	NA	NA	NA	NA	NA	NA	both_sexes	0.785858	0.693997
ENSG00000013297	CLDN11	NO	NA	NA	NA	NA	NA	NA	both_sexes	0.0320256	0.0227608
ENSG00000013306	SLC25A39	NO	NA	NA	NA	NA	NA	NA	both_sexes	0.947761	0.96708
ENSG00000013364	MVP	YES	0	0	0	0	0	0	both_sexes	0.880998	0.931306
ENSG00000013374	NUB1	YES	0	0	0	0	0	0	both_sexes	0.438554	0.231519
ENSG00000013375	PGM3	NO	NA	NA	NA	NA	NA	NA	both_sexes	0.0804807	0.0663703
ENSG00000013392	RWDD2A	NO	NA	NA	NA	NA	NA	NA	both_sexes	0.925067	0.91231
ENSG00000013441	CLK1	NO	NA	NA	NA	NA	NA	NA	both_sexes	0.0358332	0.0371737
ENSG00000013503	POLR3B	YES	0	0	0	0	0	0	both_sexes	0.253221	0.228252
ENSG00000013523	ANGEL1	YES	0	0	0	0	0	0	both_sexes	0.029855	0.0257051
ENSG00000013561	RNF14	NO	NA	NA	NA	NA	NA	NA	both_sexes	0.862567	0.843843
ENSG00000013573	DDX11	NO	NA	NA	NA	NA	NA	NA	both_sexes	0.782782	0.800898
ENSG00000013583	HEBP1	YES	0	0	0	0	0	0	both_sexes	0.960033	0.949268
ENSG00000013588	GPRC5A	YES	0	0	0	0	0	0	both_sexes	0.73404	0.839858
ENSG00000013725	CD6	NO	NA	NA	NA	NA	NA	NA	both_sexes	0.147222	0.243422
ENSG00000013810	TACC3	NO	NA	NA	NA	NA	NA	NA	both_sexes	0.870897	0.823709
ENSG00000014123	UFL1	NO	NA	NA	NA	NA	NA	NA	both_sexes	0.405901	0.356985
ENSG00000014138	POLA2	NO	NA	NA	NA	NA	NA	NA	both_sexes	0.4246	0.493262
ENSG00000014164	ZC3H3	YES	0	0	0	0	0	0	both_sexes	0.476511	0.435431
ENSG00000014216	CAPN1	NO	NA	NA	NA	NA	NA	NA	both_sexes	0.688463	0.76462
ENSG00000014257	ACP3	NO	NA	NA	NA	NA	NA	NA	both_sexes	0.127557	0.0780853
ENSG00000014641	MDH1	NO	NA	NA	NA	NA	NA	NA	both_sexes	0.531056	0.66641
ENSG00000014824	SLC30A9	NO	NA	NA	NA	NA	NA	NA	both_sexes	0.726544	0.6799
ENSG00000014914	MTMR11	NO	NA	NA	NA	NA	NA	NA	both_sexes	0.0220449	0.97743
ENSG00000014919	COX15	NO	NA	NA	NA	NA	NA	NA	both_sexes	0.663045	0.613042
ENSG00000015133	CCDC88C	NO	NA	NA	NA	NA	NA	NA	both_sexes	0.559702	0.57986
ENSG00000015153	YAF2	NO	NA	NA	NA	NA	NA	NA	both_sexes	0.851826	0.796738
ENSG00000015171	ZMYND11	NO	NA	NA	NA	NA	NA	NA	both_sexes	0.974333	0.982649
ENSG00000015413	DPEP1	NO	NA	NA	NA	NA	NA	NA	both_sexes	0.00741962	0.0079844
ENSG00000015475	BID	YES	0	0	0	0	0	0	both_sexes	0.763981	0.881279
ENSG00000015520	NPC1L1	NO	NA	NA	NA	NA	NA	NA	both_sexes	0.351805	0.311295
ENSG00000015532	XYLT2	NO	NA	NA	NA	NA	NA	NA	both_sexes	0.747722	0.756117
ENSG00000015592	STMN4	NO	NA	NA	NA	NA	NA	NA	both_sexes	0.656995	0.668126
ENSG00000015676	NUDCD3	NO	NA	NA	NA	NA	NA	NA	both_sexes	0.923238	0.911991
ENSG00000016082	ISL1	NO	NA	NA	NA	NA	NA	NA	both_sexes	0.677206	0.402012
ENSG00000016391	CHDH	NO	NA	NA	NA	NA	NA	NA	both_sexes	0.0426707	0.386341
ENSG00000016402	IL20RA	NO	NA	NA	NA	NA	NA	NA	both_sexes	0.855233	0.810569
ENSG00000016490	CLCA1	NO	NA	NA	NA	NA	NA	NA	both_sexes	0.441472	0.450623
ENSG00000016602	CLCA4	NO	NA	NA	NA	NA	NA	NA	both_sexes	0.421851	0.465289
ENSG00000016864	GLT8D1	NO	NA	NA	NA	NA	NA	NA	both_sexes	0.496963	0.49233
ENSG00000017260	ATP2C1	NO	NA	NA	NA	NA	NA	NA	both_sexes	0.655387	0.594277
ENSG00000017427	IGF1	NO	NA	NA	NA	NA	NA	NA	both_sexes	0.787672	0.750811
ENSG00000017797	RALBP1	NO	NA	NA	NA	NA	NA	NA	both_sexes	0.134221	0.150199
ENSG00000018189	RUFY3	NO	NA	NA	NA	NA	NA	NA	both_sexes	0.895958	0.916036
ENSG00000018236	CNTN1	NO	NA	NA	NA	NA	NA	NA	both_sexes	0.185983	0.183971
ENSG00000018280	SLC11A1	NO	NA	NA	NA	NA	NA	NA	both_sexes	0.667271	0.199019
ENSG00000018408	WWTR1	NO	NA	NA	NA	NA	NA	NA	both_sexes	0.134644	0.301018
ENSG00000018510	AGPS	NO	NA	NA	NA	NA	NA	NA	both_sexes	0.943294	0.93248
ENSG00000018625	ATP1A2	NO	NA	NA	NA	NA	NA	NA	both_sexes	0.670327	0.769662
ENSG00000018699	TTC27	NO	NA	NA	NA	NA	NA	NA	both_sexes	0.368565	0.307276
ENSG00000018869	ZNF582	NO	NA	NA	NA	NA	NA	NA	both_sexes	0.77762	0.794918
ENSG00000019102	VSIG2	NO	NA	NA	NA	NA	NA	NA	both_sexes	0.861158	0.854938
ENSG00000019144	PHLDB1	NO	NA	NA	NA	NA	NA	NA	both_sexes	0.868427	0.909988
ENSG00000019169	MARCO	NO	NA	NA	NA	NA	NA	NA	both_sexes	0.993957	0.992246
ENSG00000019186	CYP24A1	NO	NA	NA	NA	NA	NA	NA	both_sexes	0.194479	0.187576
ENSG00000019485	PRDM11	YES	0	0	0	0	0	0	both_sexes	0.272673	0.247101
ENSG00000019505	SYT13	YES	0	0	0	0	0	0	both_sexes	0.338839	0.269496
ENSG00000019549	SNAI2	NO	NA	NA	NA	NA	NA	NA	both_sexes	0.94126	0.925396
ENSG00000019582	CD74	NO	NA	NA	NA	NA	NA	NA	both_sexes	0.929358	0.921268
ENSG00000019991	HGF	NO	NA	NA	NA	NA	NA	NA	both_sexes	0.516239	0.548908
ENSG00000019995	ZRANB1	NO	NA	NA	NA	NA	NA	NA	both_sexes	0.953673	0.967351
ENSG00000020129	NCDN	NO	NA	NA	NA	NA	NA	NA	both_sexes	0.977179	0.971505
ENSG00000020181	ADGRA2	NO	NA	NA	NA	NA	NA	NA	both_sexes	0.014297	0.00887871
ENSG00000020256	ZFP64	NO	NA	NA	NA	NA	NA	NA	both_sexes	0.827684	0.850814
ENSG00000020426	MNAT1	NO	NA	NA	NA	NA	NA	NA	both_sexes	0.172687	0.168362
ENSG00000020577	SAMD4A	NO	NA	NA	NA	NA	NA	NA	both_sexes	0.792741	0.763612
ENSG00000020633	RUNX3	NO	NA	NA	NA	NA	NA	NA	both_sexes	0.936651	0.926509
ENSG00000020922	MRE11	NO	NA	NA	NA	NA	NA	NA	both_sexes	0.030817	0.0327844
ENSG00000021300	PLEKHB1	NO	NA	NA	NA	NA	NA	NA	both_sexes	0.678094	0.650615
ENSG00000021355	SERPINB1	NO	NA	NA	NA	NA	NA	NA	both_sexes	0.138862	0.120676
ENSG00000021461	CYP3A43	NO	NA	NA	NA	NA	NA	NA	both_sexes	0.370582	0.516496
ENSG00000021488	SLC7A9	NO	NA	NA	NA	NA	NA	NA	both_sexes	0.00926556	0.00638695
ENSG00000021574	SPAST	NO	NA	NA	NA	NA	NA	NA	both_sexes	0.128811	0.121396
ENSG00000021645	NRXN3	NO	NA	NA	NA	NA	NA	NA	both_sexes	0.712943	0.800667
ENSG00000021762	OSBPL5	NO	NA	NA	NA	NA	NA	NA	both_sexes	0.41766	0.444106
ENSG00000021776	AQR	NO	NA	NA	NA	NA	NA	NA	both_sexes	0.23846	0.439319
ENSG00000021826	CPS1	NO	NA	NA	NA	NA	NA	NA	both_sexes	0.798992	0.711813
ENSG00000021852	C8B	NO	NA	NA	NA	NA	NA	NA	both_sexes	0.567161	0.496568
ENSG00000022277	RTF2	NO	NA	NA	NA	NA	NA	NA	both_sexes	0.57375	0.615634
ENSG00000022355	GABRA1	NO	NA	NA	NA	NA	NA	NA	both_sexes	0.256619	0.270836
ENSG00000022556	NLRP2	NO	NA	NA	NA	NA	NA	NA	both_sexes	0.893483	0.857796
ENSG00000022567	SLC45A4	YES	0	0	0	1	0	1	both_sexes	0.803156	0.486053
ENSG00000022840	RNF10	NO	NA	NA	NA	NA	NA	NA	both_sexes	0.662166	0.720247
ENSG00000022976	ZNF839	NO	NA	NA	NA	NA	NA	NA	both_sexes	0.0229332	0.0204481
ENSG00000023041	ZDHHC6	NO	NA	NA	NA	NA	NA	NA	both_sexes	0.643194	0.544124
ENSG00000023171	GRAMD1B	NO	NA	NA	NA	NA	NA	NA	both_sexes	0.606689	0.652737
ENSG00000023191	RNH1	NO	NA	NA	NA	NA	NA	NA	both_sexes	0.187446	0.953425
ENSG00000023228	NDUFS1	NO	NA	NA	NA	NA	NA	NA	both_sexes	0.690346	0.71587
ENSG00000023287	RB1CC1	NO	NA	NA	NA	NA	NA	NA	both_sexes	0.908096	0.915602
ENSG00000023318	ERP44	NO	NA	NA	NA	NA	NA	NA	both_sexes	0.66455	0.69654
ENSG00000023330	ALAS1	NO	NA	NA	NA	NA	NA	NA	both_sexes	0.157279	0.310966
ENSG00000023445	BIRC3	NO	NA	NA	NA	NA	NA	NA	both_sexes	0.691202	0.737227
ENSG00000023516	AKAP11	NO	NA	NA	NA	NA	NA	NA	both_sexes	0.177728	0.233248
ENSG00000023572	GLRX2	NO	NA	NA	NA	NA	NA	NA	both_sexes	0.865365	0.866067
ENSG00000023608	SNAPC1	NO	NA	NA	NA	NA	NA	NA	both_sexes	0.779434	0.793262
ENSG00000023697	DERA	NO	NA	NA	NA	NA	NA	NA	both_sexes	0.365902	0.494828
ENSG00000023734	STRAP	NO	NA	NA	NA	NA	NA	NA	both_sexes	0.362383	0.309288
ENSG00000023839	ABCC2	NO	NA	NA	NA	NA	NA	NA	both_sexes	0.385588	0.580661
ENSG00000023892	DEF6	NO	NA	NA	NA	NA	NA	NA	both_sexes	0.0459318	0.0507085
ENSG00000023902	PLEKHO1	NO	NA	NA	NA	NA	NA	NA	both_sexes	0.92847	0.947857
ENSG00000023909	GCLM	NO	NA	NA	NA	NA	NA	NA	both_sexes	0.30865	0.343505
ENSG00000024048	UBR2	NO	NA	NA	NA	NA	NA	NA	both_sexes	0.0140877	0.0185521
ENSG00000024422	EHD2	YES	0	0	0	0	0	0	both_sexes	0.643098	0.637577
ENSG00000024526	DEPDC1	NO	NA	NA	NA	NA	NA	NA	both_sexes	0.0132417	0.0173119
ENSG00000024862	CCDC28A	NO	NA	NA	NA	NA	NA	NA	both_sexes	0.949361	0.947903
ENSG00000025039	RRAGD	NO	NA	NA	NA	NA	NA	NA	both_sexes	0.760727	0.778071
ENSG00000025156	HSF2	YES	1	0	0	1	0	2	both_sexes	0.82911	0.773166
ENSG00000025293	PHF20	NO	NA	NA	NA	NA	NA	NA	both_sexes	0.0228514	0.0298009
ENSG00000025423	HSD17B6	YES	1	0	0	0	0	1	both_sexes	0.0783347	0.11018
ENSG00000025434	NR1H3	NO	NA	NA	NA	NA	NA	NA	both_sexes	0.630952	0.625717
ENSG00000025708	TYMP	NO	NA	NA	NA	NA	NA	NA	both_sexes	0.620597	0.627744
ENSG00000025770	NCAPH2	NO	NA	NA	NA	NA	NA	NA	both_sexes	0.818084	0.767153
ENSG00000025772	TOMM34	NO	NA	NA	NA	NA	NA	NA	both_sexes	0.858802	0.844507
ENSG00000025796	SEC63	NO	NA	NA	NA	NA	NA	NA	both_sexes	0.0646979	0.0528243
ENSG00000025800	KPNA6	NO	NA	NA	NA	NA	NA	NA	both_sexes	0.537754	0.55996
ENSG00000026025	VIM	NO	NA	NA	NA	NA	NA	NA	both_sexes	0.548488	0.586622
ENSG00000026036	RTEL1-TNFRSF6B	NO	NA	NA	NA	NA	NA	NA	both_sexes	0.833632	0.88462
ENSG00000026103	FAS	NO	NA	NA	NA	NA	NA	NA	both_sexes	0.398722	0.407148
ENSG00000026297	RNASET2	NO	NA	NA	NA	NA	NA	NA	both_sexes	0.992387	0.989933
ENSG00000026508	CD44	NO	NA	NA	NA	NA	NA	NA	both_sexes	0.073729	0.0541335
ENSG00000026559	KCNG1	NO	NA	NA	NA	NA	NA	NA	both_sexes	0.270474	0.119676
ENSG00000026652	AGPAT4	NO	NA	NA	NA	NA	NA	NA	both_sexes	0.324102	0.439135
ENSG00000026751	SLAMF7	NO	NA	NA	NA	NA	NA	NA	both_sexes	0.837036	0.840989
ENSG00000026950	BTN3A1	NO	NA	NA	NA	NA	NA	NA	both_sexes	0.794125	0.862253
ENSG00000027001	MIPEP	NO	NA	NA	NA	NA	NA	NA	both_sexes	0.920883	0.926282
ENSG00000027075	PRKCH	NO	NA	NA	NA	NA	NA	NA	both_sexes	0.998613	0.998112
ENSG00000027644	INSRR	NO	NA	NA	NA	NA	NA	NA	both_sexes	0.702389	0.758316
ENSG00000027697	IFNGR1	NO	NA	NA	NA	NA	NA	NA	both_sexes	0.743171	0.69146
ENSG00000027847	B4GALT7	NO	NA	NA	NA	NA	NA	NA	both_sexes	0.347811	0.385877
ENSG00000027869	SH2D2A	NO	NA	NA	NA	NA	NA	NA	both_sexes	0.340795	0.430089
ENSG00000028116	VRK2	NO	NA	NA	NA	NA	NA	NA	both_sexes	0.231786	0.145678
ENSG00000028137	TNFRSF1B	YES	0	0	0	0	0	0	both_sexes	0.575585	0.512024
ENSG00000028203	VEZT	NO	NA	NA	NA	NA	NA	NA	both_sexes	0.651751	0.691623
ENSG00000028277	POU2F2	NO	NA	NA	NA	NA	NA	NA	both_sexes	0.691337	0.59546
ENSG00000028310	BRD9	NO	NA	NA	NA	NA	NA	NA	both_sexes	0.136717	0.139087
ENSG00000028528	SNX1	NO	NA	NA	NA	NA	NA	NA	both_sexes	0.362057	0.438042
ENSG00000028839	TBPL1	YES	0	0	0	0	0	0	both_sexes	0.471239	0.49022
ENSG00000029153	BMAL2	NO	NA	NA	NA	NA	NA	NA	both_sexes	0.130896	0.164474
ENSG00000029363	BCLAF1	NO	NA	NA	NA	NA	NA	NA	both_sexes	0.878487	0.885245
ENSG00000029364	SLC39A9	NO	NA	NA	NA	NA	NA	NA	both_sexes	0.878586	0.888949
ENSG00000029534	ANK1	NO	NA	NA	NA	NA	NA	NA	both_sexes	0.232245	0.142821
ENSG00000029559	IBSP	NO	NA	NA	NA	NA	NA	NA	both_sexes	0.161134	0.547225
ENSG00000029639	TFB1M	NO	NA	NA	NA	NA	NA	NA	both_sexes	0.526605	0.427825
ENSG00000029725	RABEP1	NO	NA	NA	NA	NA	NA	NA	both_sexes	0.0457043	0.0534545
ENSG00000030066	NUP160	NO	NA	NA	NA	NA	NA	NA	both_sexes	0.288789	0.241442
ENSG00000030110	BAK1	NO	NA	NA	NA	NA	NA	NA	both_sexes	0.769244	0.824471
ENSG00000030304	MUSK	NO	NA	NA	NA	NA	NA	NA	both_sexes	0.384422	0.381362
ENSG00000030419	IKZF2	NO	NA	NA	NA	NA	NA	NA	both_sexes	0.919723	0.899508
ENSG00000030582	GRN	NO	NA	NA	NA	NA	NA	NA	both_sexes	0.63282	0.449398
ENSG00000031003	FAM13B	YES	1	0	1	1	0	3	both_sexes	0.567434	0.783641
ENSG00000031081	ARHGAP31	YES	0	0	0	0	0	0	both_sexes	0.183926	0.297859
ENSG00000031691	CENPQ	NO	NA	NA	NA	NA	NA	NA	both_sexes	0.409061	0.426232
ENSG00000031698	SARS1	NO	NA	NA	NA	NA	NA	NA	both_sexes	0.855896	0.883556
ENSG00000031823	RANBP3	NO	NA	NA	NA	NA	NA	NA	both_sexes	0.669021	0.459647
ENSG00000032219	ARID4A	NO	NA	NA	NA	NA	NA	NA	both_sexes	0.0777996	0.1483
ENSG00000032389	EIPR1	NO	NA	NA	NA	NA	NA	NA	both_sexes	0.420379	0.486062
ENSG00000032444	PNPLA6	NO	NA	NA	NA	NA	NA	NA	both_sexes	0.0362837	0.0272017
ENSG00000032742	IFT88	NO	NA	NA	NA	NA	NA	NA	both_sexes	0.921378	0.930667
ENSG00000033011	ALG1	NO	NA	NA	NA	NA	NA	NA	both_sexes	0.816018	0.857002
ENSG00000033030	ZCCHC8	YES	0	0	0	0	0	0	both_sexes	0.892296	0.86845
ENSG00000033050	ABCF2	YES	0	0	0	0	0	0	both_sexes	0.0303138	0.0214451
ENSG00000033100	CHPF2	YES	0	0	0	0	0	0	both_sexes	0.957508	0.949492
ENSG00000033122	LRRC7	NO	NA	NA	NA	NA	NA	NA	both_sexes	0.885748	0.428779
ENSG00000033170	FUT8	NO	NA	NA	NA	NA	NA	NA	both_sexes	0.730952	0.715745
ENSG00000033178	UBA6	NO	NA	NA	NA	NA	NA	NA	both_sexes	0.834813	0.877955
ENSG00000033327	GAB2	NO	NA	NA	NA	NA	NA	NA	both_sexes	0.97	0.97385
ENSG00000033627	ATP6V0A1	NO	NA	NA	NA	NA	NA	NA	both_sexes	0.353193	0.338609
ENSG00000033800	PIAS1	NO	NA	NA	NA	NA	NA	NA	both_sexes	0.396283	0.305234
ENSG00000033867	SLC4A7	NO	NA	NA	NA	NA	NA	NA	both_sexes	0.517786	0.528031
ENSG00000034053	APBA2	NO	NA	NA	NA	NA	NA	NA	both_sexes	0.856727	0.821488
ENSG00000034152	MAP2K3	NO	NA	NA	NA	NA	NA	NA	both_sexes	0.868128	0.670816
ENSG00000034239	CLXN	NO	NA	NA	NA	NA	NA	NA	both_sexes	0.709905	0.657106
ENSG00000034510	TMSB10	NO	NA	NA	NA	NA	NA	NA	both_sexes	0.617343	0.625341
ENSG00000034533	ASTE1	NO	NA	NA	NA	NA	NA	NA	both_sexes	0.540356	0.531248
ENSG00000034677	RNF19A	NO	NA	NA	NA	NA	NA	NA	both_sexes	0.681638	0.649233
ENSG00000034693	PEX3	NO	NA	NA	NA	NA	NA	NA	both_sexes	0.84163	0.8156
ENSG00000034713	GABARAPL2	NO	NA	NA	NA	NA	NA	NA	both_sexes	0.810519	0.875935
ENSG00000034971	MYOC	NO	NA	NA	NA	NA	NA	NA	both_sexes	0.642925	0.661298
ENSG00000035115	SH3YL1	YES	0	0	0	0	0	0	both_sexes	0.845582	0.903429
ENSG00000035141	FAM136A	YES	0	0	0	0	0	0	both_sexes	0.736992	0.692404
ENSG00000035403	VCL	YES	0	1	0	1	0	2	both_sexes	0.303647	0.256262
ENSG00000035499	DEPDC1B	NO	NA	NA	NA	NA	NA	NA	both_sexes	0.776048	0.76168
ENSG00000035664	DAPK2	YES	0	0	0	1	0	1	both_sexes	0.665063	0.681115
ENSG00000035681	NSMAF	NO	NA	NA	NA	NA	NA	NA	both_sexes	0.878321	0.905899
ENSG00000035687	ADSS2	NO	NA	NA	NA	NA	NA	NA	both_sexes	0.0334289	0.0358447
ENSG00000035720	STAP1	NO	NA	NA	NA	NA	NA	NA	both_sexes	0.722292	0.349724
ENSG00000035862	TIMP2	NO	NA	NA	NA	NA	NA	NA	both_sexes	0.825736	0.807273
ENSG00000035928	RFC1	NO	NA	NA	NA	NA	NA	NA	both_sexes	0.135067	0.196467
ENSG00000036054	TBC1D23	NO	NA	NA	NA	NA	NA	NA	both_sexes	0.160337	0.133122
ENSG00000036257	CUL3	NO	NA	NA	NA	NA	NA	NA	both_sexes	0.695578	0.784297
ENSG00000036448	MYOM2	NO	NA	NA	NA	NA	NA	NA	both_sexes	0.00779872	0.00529098
ENSG00000036530	CYP46A1	NO	NA	NA	NA	NA	NA	NA	both_sexes	0.967875	0.97555
ENSG00000036549	ZZZ3	NO	NA	NA	NA	NA	NA	NA	both_sexes	0.843931	0.813462
ENSG00000036565	SLC18A1	NO	NA	NA	NA	NA	NA	NA	both_sexes	0.737561	0.768212
ENSG00000036672	USP2	NO	NA	NA	NA	NA	NA	NA	both_sexes	0.0106201	0.00651944
ENSG00000036828	CASR	YES	0	0	0	0	0	0	both_sexes	0.689224	0.679166
ENSG00000037042	TUBG2	NO	NA	NA	NA	NA	NA	NA	both_sexes	0.506872	0.638202
ENSG00000037241	RPL26L1	YES	0	0	0	0	0	0	both_sexes	0.855595	0.85975
ENSG00000037280	FLT4	NO	NA	NA	NA	NA	NA	NA	both_sexes	0.386616	0.380414
ENSG00000037474	NSUN2	NO	NA	NA	NA	NA	NA	NA	both_sexes	0.725346	0.784706
ENSG00000037637	FBXO42	YES	0	0	0	0	0	0	both_sexes	0.87301	0.815487
ENSG00000037749	MFAP3	NO	NA	NA	NA	NA	NA	NA	both_sexes	0.0575294	0.0574711
ENSG00000037757	MRI1	NO	NA	NA	NA	NA	NA	NA	both_sexes	0.832449	0.868498
ENSG00000037897	METTL1	NO	NA	NA	NA	NA	NA	NA	both_sexes	0.0964342	0.126171
ENSG00000037965	HOXC8	NO	NA	NA	NA	NA	NA	NA	both_sexes	0.630704	0.628191
ENSG00000038002	AGA	NO	NA	NA	NA	NA	NA	NA	both_sexes	0.375885	0.269188
ENSG00000038210	PI4K2B	NO	NA	NA	NA	NA	NA	NA	both_sexes	0.0375617	0.0343202
ENSG00000038219	BOD1L1	NO	NA	NA	NA	NA	NA	NA	both_sexes	0.861838	0.900663
ENSG00000038274	MAT2B	NO	NA	NA	NA	NA	NA	NA	both_sexes	0.724458	0.767253
ENSG00000038295	TLL1	NO	NA	NA	NA	NA	NA	NA	both_sexes	0.725012	0.726738
ENSG00000038358	EDC4	NO	NA	NA	NA	NA	NA	NA	both_sexes	0.47762	0.559978
ENSG00000038382	TRIO	NO	NA	NA	NA	NA	NA	NA	both_sexes	0.344601	0.350605
ENSG00000038427	VCAN	NO	NA	NA	NA	NA	NA	NA	both_sexes	0.0881249	0.0752664
ENSG00000038532	CLEC16A	NO	NA	NA	NA	NA	NA	NA	both_sexes	0.436569	0.556366
ENSG00000038945	MSR1	NO	NA	NA	NA	NA	NA	NA	both_sexes	0.444536	0.262377
ENSG00000039068	CDH1	NO	NA	NA	NA	NA	NA	NA	both_sexes	0.0923676	0.11608
ENSG00000039123	MTREX	NO	NA	NA	NA	NA	NA	NA	both_sexes	0.914516	0.897552
ENSG00000039139	DNAH5	NO	NA	NA	NA	NA	NA	NA	both_sexes	0.155469	0.153609
ENSG00000039319	ZFYVE16	NO	NA	NA	NA	NA	NA	NA	both_sexes	0.00484237	0.00544097
ENSG00000039523	RIPOR1	NO	NA	NA	NA	NA	NA	NA	both_sexes	0.0122174	0.00848089
ENSG00000039537	C6	NO	NA	NA	NA	NA	NA	NA	both_sexes	0.290882	0.90306
ENSG00000039560	RAI14	NO	NA	NA	NA	NA	NA	NA	both_sexes	0.266266	0.242781
ENSG00000039600	SOX30	NO	NA	NA	NA	NA	NA	NA	both_sexes	0.935596	0.950054
ENSG00000039650	PNKP	NO	NA	NA	NA	NA	NA	NA	both_sexes	0.114271	0.10966
ENSG00000039987	BEST2	NO	NA	NA	NA	NA	NA	NA	both_sexes	0.830654	0.819607
ENSG00000040199	PHLPP2	NO	NA	NA	NA	NA	NA	NA	both_sexes	0.507321	0.439477
ENSG00000040275	SPDL1	NO	NA	NA	NA	NA	NA	NA	both_sexes	0.74393	0.709881
ENSG00000040341	STAU2	NO	NA	NA	NA	NA	NA	NA	both_sexes	0.21437	0.168083
ENSG00000040487	SLC66A1	NO	NA	NA	NA	NA	NA	NA	both_sexes	0.354885	0.51968
ENSG00000040531	CTNS	YES	0	0	0	0	0	0	both_sexes	0.931574	0.954938
ENSG00000040608	RTN4R	NO	NA	NA	NA	NA	NA	NA	both_sexes	0.00320347	0.00398847
ENSG00000040633	PHF23	YES	0	0	0	0	0	0	both_sexes	0.611865	0.503823
ENSG00000040731	CDH10	NO	NA	NA	NA	NA	NA	NA	both_sexes	0.635868	0.613822
ENSG00000040933	INPP4A	NO	NA	NA	NA	NA	NA	NA	both_sexes	0.118894	0.0871121
ENSG00000041353	RAB27B	NO	NA	NA	NA	NA	NA	NA	both_sexes	0.270848	0.302725
ENSG00000041357	PSMA4	NO	NA	NA	NA	NA	NA	NA	both_sexes	0.086512	0.0956771
ENSG00000041515	MYO16	NO	NA	NA	NA	NA	NA	NA	both_sexes	0.236275	0.180549
ENSG00000041802	LSG1	YES	0	0	0	0	0	0	both_sexes	0.82636	0.7152
ENSG00000041880	PARP3	NO	NA	NA	NA	NA	NA	NA	both_sexes	0.876242	0.91005
ENSG00000041982	TNC	NO	NA	NA	NA	NA	NA	NA	both_sexes	0.687144	0.647434
ENSG00000041988	THAP3	NO	NA	NA	NA	NA	NA	NA	both_sexes	0.956767	0.94893
ENSG00000042062	RIPOR3	NO	NA	NA	NA	NA	NA	NA	both_sexes	0.777658	0.841109
ENSG00000042088	TDP1	NO	NA	NA	NA	NA	NA	NA	both_sexes	0.954539	0.969356
ENSG00000042286	AIFM2	NO	NA	NA	NA	NA	NA	NA	both_sexes	0.198808	0.153483
ENSG00000042317	SPATA7	NO	NA	NA	NA	NA	NA	NA	both_sexes	0.83486	0.867482
ENSG00000042429	MED17	NO	NA	NA	NA	NA	NA	NA	both_sexes	0.817899	0.78909
ENSG00000042445	RETSAT	NO	NA	NA	NA	NA	NA	NA	both_sexes	0.642348	0.534237
ENSG00000042493	CAPG	NO	NA	NA	NA	NA	NA	NA	both_sexes	0.737315	0.750542
ENSG00000042753	AP2S1	NO	NA	NA	NA	NA	NA	NA	both_sexes	0.544436	0.666674
ENSG00000042781	USH2A	NO	NA	NA	NA	NA	NA	NA	both_sexes	0.148108	0.114491
ENSG00000042813	ZPBP	NO	NA	NA	NA	NA	NA	NA	both_sexes	0.510673	0.454111
ENSG00000042832	TG	NO	NA	NA	NA	NA	NA	NA	both_sexes	0.38966	0.181289
ENSG00000042980	ADAM28	NO	NA	NA	NA	NA	NA	NA	both_sexes	0.935729	0.95666
ENSG00000043039	BARX2	YES	0	0	0	0	0	0	both_sexes	0.127391	0.129675
ENSG00000043093	DCUN1D1	NO	NA	NA	NA	NA	NA	NA	both_sexes	0.29067	0.238191
ENSG00000043143	JADE2	NO	NA	NA	NA	NA	NA	NA	both_sexes	0.1491	0.151269
ENSG00000043355	ZIC2	NO	NA	NA	NA	NA	NA	NA	both_sexes	0.293877	0.296055
ENSG00000043462	LCP2	NO	NA	NA	NA	NA	NA	NA	both_sexes	0.954097	0.940007
ENSG00000043514	TRIT1	NO	NA	NA	NA	NA	NA	NA	both_sexes	0.16736	0.125748
ENSG00000043591	ADRB1	YES	0	0	0	1	0	1	both_sexes	0.986055	0.981292
ENSG00000044012	GUCA2B	YES	0	0	0	0	0	0	both_sexes	0.600775	0.549132
ENSG00000044090	CUL7	NO	NA	NA	NA	NA	NA	NA	both_sexes	0.736799	0.674026
ENSG00000044115	CTNNA1	YES	0	0	0	0	0	0	both_sexes	0.921853	0.950629
ENSG00000044459	CNTLN	YES	0	0	0	0	0	0	both_sexes	0.159087	0.17959
ENSG00000044524	EPHA3	YES	1	0	0	0	0	1	both_sexes	0.567934	0.69071
ENSG00000044574	HSPA5	NO	NA	NA	NA	NA	NA	NA	both_sexes	0.353279	0.322678
ENSG00000046604	DSG2	YES	0	0	0	1	0	1	both_sexes	0.932556	0.959127
ENSG00000046889	PREX2	NO	NA	NA	NA	NA	NA	NA	both_sexes	0.96463	0.977211
ENSG00000047056	WDR37	NO	NA	NA	NA	NA	NA	NA	both_sexes	0.97103	0.793298
ENSG00000047188	YTHDC2	NO	NA	NA	NA	NA	NA	NA	both_sexes	0.805344	0.829292
ENSG00000047249	ATP6V1H	NO	NA	NA	NA	NA	NA	NA	both_sexes	0.277023	0.236952
ENSG00000047315	POLR2B	YES	0	0	0	0	0	0	both_sexes	0.582823	0.653894
ENSG00000047346	ATOSA	NO	NA	NA	NA	NA	NA	NA	both_sexes	0.144152	0.104479
ENSG00000047365	ARAP2	NO	NA	NA	NA	NA	NA	NA	both_sexes	0.938908	0.955887
ENSG00000047410	TPR	NO	NA	NA	NA	NA	NA	NA	both_sexes	0.767542	0.766717
ENSG00000047457	CP	YES	0	0	0	0	0	0	both_sexes	0.163211	0.191309
ENSG00000047578	KATNIP	NO	NA	NA	NA	NA	NA	NA	both_sexes	0.471132	0.396625
ENSG00000047579	DTNBP1	NO	NA	NA	NA	NA	NA	NA	both_sexes	0.649301	0.660153
ENSG00000047617	ANO2	NO	NA	NA	NA	NA	NA	NA	both_sexes	0.596009	0.453797
ENSG00000047621	C12orf4	YES	0	0	0	0	0	0	both_sexes	0.775486	0.769104
ENSG00000047662	FAM184B	NO	NA	NA	NA	NA	NA	NA	both_sexes	0.492901	0.477522
ENSG00000047849	MAP4	NO	NA	NA	NA	NA	NA	NA	both_sexes	0.911294	0.925792
ENSG00000047932	GOPC	YES	1	0	0	0	0	1	both_sexes	0.210638	0.351029
ENSG00000047936	ROS1	YES	0	0	0	0	0	0	both_sexes	0.0336165	0.0202465
ENSG00000048028	USP28	YES	0	0	0	1	0	1	both_sexes	0.880731	0.852769
ENSG00000048052	HDAC9	NO	NA	NA	NA	NA	NA	NA	both_sexes	0.109564	0.0772915
ENSG00000048140	TSPAN17	NO	NA	NA	NA	NA	NA	NA	both_sexes	0.980469	0.973272
ENSG00000048162	NOP16	NO	NA	NA	NA	NA	NA	NA	both_sexes	0.468093	0.62175
ENSG00000048342	CC2D2A	NO	NA	NA	NA	NA	NA	NA	both_sexes	0.937792	0.830192
ENSG00000048392	RRM2B	NO	NA	NA	NA	NA	NA	NA	both_sexes	0.989714	0.985967
ENSG00000048405	ZNF800	NO	NA	NA	NA	NA	NA	NA	both_sexes	0.720031	0.710167
ENSG00000048462	TNFRSF17	NO	NA	NA	NA	NA	NA	NA	both_sexes	0.969393	0.961083
ENSG00000048471	SNX29	NO	NA	NA	NA	NA	NA	NA	both_sexes	0.526197	0.585254
ENSG00000048540	LMO3	NO	NA	NA	NA	NA	NA	NA	both_sexes	0.750609	0.780091
ENSG00000048544	MRPS10	NO	NA	NA	NA	NA	NA	NA	both_sexes	0.804374	0.76762
ENSG00000048545	GUCA1A	NO	NA	NA	NA	NA	NA	NA	both_sexes	0.415701	0.593724
ENSG00000048649	RSF1	NO	NA	NA	NA	NA	NA	NA	both_sexes	0.807915	0.15049
ENSG00000048707	VPS13D	YES	0	0	0	0	0	0	both_sexes	0.317214	0.379898
ENSG00000048740	CELF2	NO	NA	NA	NA	NA	NA	NA	both_sexes	0.611701	0.654018
ENSG00000048828	FAM120A	NO	NA	NA	NA	NA	NA	NA	both_sexes	0.221015	0.222935
ENSG00000048991	R3HDM1	NO	NA	NA	NA	NA	NA	NA	both_sexes	0.460254	0.658003
ENSG00000049089	COL9A2	NO	NA	NA	NA	NA	NA	NA	both_sexes	0.719408	0.705506
ENSG00000049130	KITLG	NO	NA	NA	NA	NA	NA	NA	both_sexes	0.220334	0.248446
ENSG00000049167	ERCC8	NO	NA	NA	NA	NA	NA	NA	both_sexes	0.611294	0.619044
ENSG00000049192	ADAMTS6	NO	NA	NA	NA	NA	NA	NA	both_sexes	0.930461	0.947261
ENSG00000049239	H6PD	NO	NA	NA	NA	NA	NA	NA	both_sexes	0.883144	0.696784
ENSG00000049245	VAMP3	NO	NA	NA	NA	NA	NA	NA	both_sexes	0.380828	0.319871
ENSG00000049246	PER3	NO	NA	NA	NA	NA	NA	NA	both_sexes	0.874956	0.890675
ENSG00000049247	UTS2	NO	NA	NA	NA	NA	NA	NA	both_sexes	0.845014	0.816564
ENSG00000049249	TNFRSF9	NO	NA	NA	NA	NA	NA	NA	both_sexes	0.375963	0.525768
ENSG00000049283	EPN3	NO	NA	NA	NA	NA	NA	NA	both_sexes	0.733921	0.758996
ENSG00000049323	LTBP1	NO	NA	NA	NA	NA	NA	NA	both_sexes	0.889709	0.917769
ENSG00000049449	RCN1	NO	NA	NA	NA	NA	NA	NA	both_sexes	0.693054	0.856052
ENSG00000049540	ELN	NO	NA	NA	NA	NA	NA	NA	both_sexes	0.574175	0.68145
ENSG00000049541	RFC2	YES	0	0	0	0	0	0	both_sexes	0.707751	0.707983
ENSG00000049618	ARID1B	NO	NA	NA	NA	NA	NA	NA	both_sexes	0.228637	0.377442
ENSG00000049656	CLPTM1L	NO	NA	NA	NA	NA	NA	NA	both_sexes	0.46114	0.501575
ENSG00000049759	NEDD4L	NO	NA	NA	NA	NA	NA	NA	both_sexes	0.0422727	0.0538044
ENSG00000049860	HEXB	NO	NA	NA	NA	NA	NA	NA	both_sexes	0.492272	0.399809
ENSG00000049883	PTCD2	YES	0	0	0	0	0	0	both_sexes	0.58759	0.577988
ENSG00000050130	JKAMP	NO	NA	NA	NA	NA	NA	NA	both_sexes	0.344157	0.492596
ENSG00000050165	DKK 3.00	NO	NA	NA	NA	NA	NA	NA	both_sexes	0.0129759	0.00870884
ENSG00000050327	ARHGEF5	NO	NA	NA	NA	NA	NA	NA	both_sexes	0.453898	0.378974
ENSG00000050344	NFE2L3	NO	NA	NA	NA	NA	NA	NA	both_sexes	0.886022	0.89817
ENSG00000050393	MCUR1	NO	NA	NA	NA	NA	NA	NA	both_sexes	0.538233	0.626111
ENSG00000050405	LIMA1	NO	NA	NA	NA	NA	NA	NA	both_sexes	0.00497204	0.00370287
ENSG00000050426	LETMD1	YES	1	0	1	0	0	2	both_sexes	0.905268	0.94557
ENSG00000050438	SLC4A8	YES	0	0	0	0	0	0	both_sexes	0.858471	0.851252
ENSG00000050555	LAMC3	NO	NA	NA	NA	NA	NA	NA	both_sexes	0.200969	0.186097
ENSG00000050628	PTGER3	NO	NA	NA	NA	NA	NA	NA	both_sexes	0.965732	0.976122
ENSG00000050730	TNIP3	NO	NA	NA	NA	NA	NA	NA	both_sexes	0.78543	0.789273
ENSG00000050748	MAPK9	NO	NA	NA	NA	NA	NA	NA	both_sexes	0.111428	0.0718664
ENSG00000050767	COL23A1	NO	NA	NA	NA	NA	NA	NA	both_sexes	0.814786	0.859354
ENSG00000050820	BCAR1	NO	NA	NA	NA	NA	NA	NA	both_sexes	0.644202	0.338091
ENSG00000051009	FHIP1B	NO	NA	NA	NA	NA	NA	NA	both_sexes	0.586557	0.542464
ENSG00000051108	HERPUD1	NO	NA	NA	NA	NA	NA	NA	both_sexes	0.668445	0.568369
ENSG00000051128	HOMER3	NO	NA	NA	NA	NA	NA	NA	both_sexes	0.864713	0.921018
ENSG00000051180	RAD51	NO	NA	NA	NA	NA	NA	NA	both_sexes	0.736751	0.715409
ENSG00000051341	POLQ	NO	NA	NA	NA	NA	NA	NA	both_sexes	0.0945311	0.0921158
ENSG00000051382	PIK3CB	NO	NA	NA	NA	NA	NA	NA	both_sexes	0.231182	0.153257
ENSG00000051523	CYBA	YES	0	0	0	0	0	0	both_sexes	0.83737	0.834027
ENSG00000051596	THOC3	NO	NA	NA	NA	NA	NA	NA	both_sexes	0.845465	0.897434
ENSG00000051620	HEBP2	NO	NA	NA	NA	NA	NA	NA	both_sexes	0.0795741	0.042722
ENSG00000051825	MPHOSPH9	YES	0	0	0	1	0	1	both_sexes	0.0269	0.0333184
ENSG00000052126	PLEKHA5	NO	NA	NA	NA	NA	NA	NA	both_sexes	0.106691	0.0878615
ENSG00000052344	PRSS8	NO	NA	NA	NA	NA	NA	NA	both_sexes	0.247115	0.286888
ENSG00000052723	SIKE1	NO	NA	NA	NA	NA	NA	NA	both_sexes	0.740045	0.691818
ENSG00000052749	RRP12	NO	NA	NA	NA	NA	NA	NA	both_sexes	0.409115	0.439624
ENSG00000052795	FNIP2	NO	NA	NA	NA	NA	NA	NA	both_sexes	0.20508	0.240818
ENSG00000052802	MSMO1	NO	NA	NA	NA	NA	NA	NA	both_sexes	0.899898	0.862319
ENSG00000052841	TTC17	NO	NA	NA	NA	NA	NA	NA	both_sexes	0.9587	0.943861
ENSG00000052850	ALX4	NO	NA	NA	NA	NA	NA	NA	both_sexes	0.593969	0.512287
ENSG00000053108	FSTL4	NO	NA	NA	NA	NA	NA	NA	both_sexes	0.184613	0.211353
ENSG00000053254	FOXN3	NO	NA	NA	NA	NA	NA	NA	both_sexes	0.440173	0.527463
ENSG00000053328	METTL24	NO	NA	NA	NA	NA	NA	NA	both_sexes	0.158719	0.155873
ENSG00000053371	AKR7A2	YES	0	0	0	0	0	0	both_sexes	0.671996	0.609189
ENSG00000053372	MRTO4	YES	0	0	0	0	0	0	both_sexes	0.206436	0.223626
ENSG00000053438	NNAT	NO	NA	NA	NA	NA	NA	NA	both_sexes	0.0620626	0.0624809
ENSG00000053501	USE1	NO	NA	NA	NA	NA	NA	NA	both_sexes	0.791175	0.830967
ENSG00000053524	MCF2L2	NO	NA	NA	NA	NA	NA	NA	both_sexes	0.773516	0.774309
ENSG00000053702	NRIP2	NO	NA	NA	NA	NA	NA	NA	both_sexes	0.212673	0.179409
ENSG00000053747	LAMA3	NO	NA	NA	NA	NA	NA	NA	both_sexes	0.640777	0.63163
ENSG00000053770	AP5M1	NO	NA	NA	NA	NA	NA	NA	both_sexes	0.579841	0.885749
ENSG00000053900	ANAPC4	NO	NA	NA	NA	NA	NA	NA	both_sexes	0.0303919	0.038228
ENSG00000053918	KCNQ1	NO	NA	NA	NA	NA	NA	NA	both_sexes	0.622648	0.684136
ENSG00000054116	TRAPPC3	YES	0	0	0	0	0	0	both_sexes	0.766947	0.835945
ENSG00000054118	THRAP3	YES	0	0	0	0	0	0	both_sexes	0.00859431	0.0062503
ENSG00000054148	PHPT1	NO	NA	NA	NA	NA	NA	NA	both_sexes	0.678191	0.827998
ENSG00000054179	ENTPD2	NO	NA	NA	NA	NA	NA	NA	both_sexes	0.985544	0.735969
ENSG00000054219	LY75	NO	NA	NA	NA	NA	NA	NA	both_sexes	0.864898	0.902318
ENSG00000054267	ARID4B	NO	NA	NA	NA	NA	NA	NA	both_sexes	0.275978	0.343439
ENSG00000054277	OPN3	NO	NA	NA	NA	NA	NA	NA	both_sexes	0.403748	0.322075
ENSG00000054282	SDCCAG8	NO	NA	NA	NA	NA	NA	NA	both_sexes	0.0656152	0.084201
ENSG00000054356	PTPRN	NO	NA	NA	NA	NA	NA	NA	both_sexes	0.694826	0.587809
ENSG00000054392	HHAT	NO	NA	NA	NA	NA	NA	NA	both_sexes	0.0298628	0.0192505
ENSG00000054523	KIF1B	NO	NA	NA	NA	NA	NA	NA	both_sexes	0.981727	0.989118
ENSG00000054598	FOXC1	NO	NA	NA	NA	NA	NA	NA	both_sexes	0.87822	0.859112
ENSG00000054611	TBC1D22A	NO	NA	NA	NA	NA	NA	NA	both_sexes	0.395503	0.512139
ENSG00000054654	SYNE2	YES	1	0	1	0	0	2	both_sexes	0.0325584	0.0247331
ENSG00000054690	PLEKHH1	NO	NA	NA	NA	NA	NA	NA	both_sexes	0.481697	0.348491
ENSG00000054793	ATP9A	NO	NA	NA	NA	NA	NA	NA	both_sexes	0.723178	0.689381
ENSG00000054796	SPO11	NO	NA	NA	NA	NA	NA	NA	both_sexes	0.871216	0.850177
ENSG00000054803	CBLN4	NO	NA	NA	NA	NA	NA	NA	both_sexes	0.0269023	0.0197771
ENSG00000054938	CHRDL2	NO	NA	NA	NA	NA	NA	NA	both_sexes	0.759551	0.725409
ENSG00000054965	FAM168A	NO	NA	NA	NA	NA	NA	NA	both_sexes	0.888046	0.906538
ENSG00000054967	RELT	NO	NA	NA	NA	NA	NA	NA	both_sexes	0.927125	0.875463
ENSG00000054983	GALC	NO	NA	NA	NA	NA	NA	NA	both_sexes	0.360426	0.666817
ENSG00000055044	NOP58	NO	NA	NA	NA	NA	NA	NA	both_sexes	0.315439	0.770536
ENSG00000055070	SZRD1	YES	0	0	0	0	0	0	both_sexes	0.61749	0.742238
ENSG00000055118	KCNH2	YES	1	0	0	1	0	2	both_sexes	0.559286	0.570282
ENSG00000055130	CUL1	YES	0	0	0	0	0	0	both_sexes	0.13048	0.128099
ENSG00000055147	FAM114A2	NO	NA	NA	NA	NA	NA	NA	both_sexes	0.418193	0.4831
ENSG00000055163	CYFIP2	NO	NA	NA	NA	NA	NA	NA	both_sexes	0.111963	0.0859624
ENSG00000055208	TAB2	YES	0	0	0	0	0	0	both_sexes	0.881706	0.858649
ENSG00000055211	GINM1	YES	0	0	0	0	0	0	both_sexes	0.298791	0.407912
ENSG00000055332	EIF2AK2	NO	NA	NA	NA	NA	NA	NA	both_sexes	0.921872	0.898501
ENSG00000055483	USP36	NO	NA	NA	NA	NA	NA	NA	both_sexes	0.27569	0.249381
ENSG00000055609	KMT2C	NO	NA	NA	NA	NA	NA	NA	both_sexes	0.0451012	0.0301872
ENSG00000055732	MCOLN3	NO	NA	NA	NA	NA	NA	NA	both_sexes	0.201587	0.190684
ENSG00000055813	CCDC85A	NO	NA	NA	NA	NA	NA	NA	both_sexes	0.984551	0.980274
ENSG00000055917	PUM2	NO	NA	NA	NA	NA	NA	NA	both_sexes	0.348671	0.141009
ENSG00000055950	MRPL43	NO	NA	NA	NA	NA	NA	NA	both_sexes	0.49946	0.46497
ENSG00000055955	ITIH4	NO	NA	NA	NA	NA	NA	NA	both_sexes	0.173909	0.329198
ENSG00000055957	ITIH1	NO	NA	NA	NA	NA	NA	NA	both_sexes	0.43283	0.576003
ENSG00000056050	HPF1	NO	NA	NA	NA	NA	NA	NA	both_sexes	0.197424	0.161473
ENSG00000056097	ZFR	NO	NA	NA	NA	NA	NA	NA	both_sexes	0.0462914	0.049514
ENSG00000056291	NPFFR2	NO	NA	NA	NA	NA	NA	NA	both_sexes	0.6731	0.587177
ENSG00000056487	PHF21B	NO	NA	NA	NA	NA	NA	NA	both_sexes	0.164954	0.224352
ENSG00000056558	TRAF1	NO	NA	NA	NA	NA	NA	NA	both_sexes	0.862696	0.834313
ENSG00000056586	RC3H2	NO	NA	NA	NA	NA	NA	NA	both_sexes	0.20691	0.145639
ENSG00000056736	IL17RB	NO	NA	NA	NA	NA	NA	NA	both_sexes	0.989229	0.985166
ENSG00000056972	TRAF3IP2	NO	NA	NA	NA	NA	NA	NA	both_sexes	0.287799	0.285878
ENSG00000057019	DCBLD2	NO	NA	NA	NA	NA	NA	NA	both_sexes	0.747644	0.814503
ENSG00000057149	SERPINB3	NO	NA	NA	NA	NA	NA	NA	both_sexes	0.829081	0.895522
ENSG00000057252	SOAT1	NO	NA	NA	NA	NA	NA	NA	both_sexes	0.76891	0.749611
ENSG00000057294	PKP2	YES	1	0	1	1	0	3	both_sexes	1.78746e-14	2.18714e-14
ENSG00000057468	MSH4	NO	NA	NA	NA	NA	NA	NA	both_sexes	0.855929	0.822437
ENSG00000057593	F7	YES	0	0	0	0	0	0	both_sexes	0.848526	0.894399
ENSG00000057608	GDI2	NO	NA	NA	NA	NA	NA	NA	both_sexes	0.555493	0.685084
ENSG00000057657	PRDM1	NO	NA	NA	NA	NA	NA	NA	both_sexes	0.951465	0.933489
ENSG00000057663	ATG5	NO	NA	NA	NA	NA	NA	NA	both_sexes	0.125932	0.162486
ENSG00000057704	TMCC3	NO	NA	NA	NA	NA	NA	NA	both_sexes	0.748179	0.818881
ENSG00000057757	PITHD1	YES	0	0	0	0	0	0	both_sexes	0.990654	0.988016
ENSG00000057935	MTA3	NO	NA	NA	NA	NA	NA	NA	both_sexes	0.851139	0.798905
ENSG00000058056	USP13	YES	0	0	0	1	0	1	both_sexes	0.67826	0.721221
ENSG00000058063	ATP11B	NO	NA	NA	NA	NA	NA	NA	both_sexes	0.624014	0.595754
ENSG00000058085	LAMC2	NO	NA	NA	NA	NA	NA	NA	both_sexes	0.645646	0.667077
ENSG00000058091	CDK14	NO	NA	NA	NA	NA	NA	NA	both_sexes	0.208955	0.257091
ENSG00000058262	SEC61A1	NO	NA	NA	NA	NA	NA	NA	both_sexes	0.494768	0.65131
ENSG00000058272	PPP1R12A	NO	NA	NA	NA	NA	NA	NA	both_sexes	0.164441	0.132741
ENSG00000058335	RASGRF1	NO	NA	NA	NA	NA	NA	NA	both_sexes	0.358301	0.372092
ENSG00000058404	CAMK2B	NO	NA	NA	NA	NA	NA	NA	both_sexes	0.821737	0.867298
ENSG00000058453	CROCC	NO	NA	NA	NA	NA	NA	NA	both_sexes	0.832041	0.884212
ENSG00000058600	POLR3E	NO	NA	NA	NA	NA	NA	NA	both_sexes	0.886374	0.883724
ENSG00000058668	ATP2B4	NO	NA	NA	NA	NA	NA	NA	both_sexes	0.313488	0.277336
ENSG00000058673	ZC3H11A	NO	NA	NA	NA	NA	NA	NA	both_sexes	0.762871	0.706237
ENSG00000058729	RIOK2	NO	NA	NA	NA	NA	NA	NA	both_sexes	0.491454	0.280122
ENSG00000058799	YIPF1	NO	NA	NA	NA	NA	NA	NA	both_sexes	0.766989	0.80566
ENSG00000058804	NDC1	NO	NA	NA	NA	NA	NA	NA	both_sexes	0.348949	0.330414
ENSG00000058866	DGKG	NO	NA	NA	NA	NA	NA	NA	both_sexes	0.882985	0.842663
ENSG00000059122	FLYWCH1	NO	NA	NA	NA	NA	NA	NA	both_sexes	0.850494	0.899388
ENSG00000059145	UNKL	NO	NA	NA	NA	NA	NA	NA	both_sexes	0.725447	0.817554
ENSG00000059377	TBXAS1	NO	NA	NA	NA	NA	NA	NA	both_sexes	0.0188965	0.012672
ENSG00000059378	PARP12	NO	NA	NA	NA	NA	NA	NA	both_sexes	0.997778	0.997035
ENSG00000059573	ALDH18A1	NO	NA	NA	NA	NA	NA	NA	both_sexes	0.115894	0.103054
ENSG00000059588	TARBP1	NO	NA	NA	NA	NA	NA	NA	both_sexes	0.000998115	0.00121002
ENSG00000059691	GATB	NO	NA	NA	NA	NA	NA	NA	both_sexes	0.904847	0.929106
ENSG00000059728	MXD1	YES	1	0	0	0	0	1	both_sexes	0.750752	0.692841
ENSG00000059758	CDK17	NO	NA	NA	NA	NA	NA	NA	both_sexes	0.209622	0.194602
ENSG00000059769	DNAJC25	NO	NA	NA	NA	NA	NA	NA	both_sexes	0.186165	0.192761
ENSG00000059804	SLC2A3	NO	NA	NA	NA	NA	NA	NA	both_sexes	0.144673	0.138804
ENSG00000059915	PSD	YES	1	0	0	0	0	1	both_sexes	0.0986711	0.0561968
ENSG00000060069	CTDP1	YES	0	0	0	0	0	0	both_sexes	0.844487	0.849059
ENSG00000060138	YBX3	NO	NA	NA	NA	NA	NA	NA	both_sexes	0.299431	0.251433
ENSG00000060140	STYK1	NO	NA	NA	NA	NA	NA	NA	both_sexes	0.0814976	0.117837
ENSG00000060237	WNK1	NO	NA	NA	NA	NA	NA	NA	both_sexes	0.126254	0.127047
ENSG00000060339	CCAR1	NO	NA	NA	NA	NA	NA	NA	both_sexes	0.992673	0.886065
ENSG00000060491	OGFR	YES	0	0	0	0	0	0	both_sexes	0.00211378	0.00246939
ENSG00000060558	GNA15	NO	NA	NA	NA	NA	NA	NA	both_sexes	0.918557	0.888341
ENSG00000060566	CREB3L3	NO	NA	NA	NA	NA	NA	NA	both_sexes	0.955231	0.581405
ENSG00000060642	PIGV	NO	NA	NA	NA	NA	NA	NA	both_sexes	0.784494	0.751279
ENSG00000060656	PTPRU	NO	NA	NA	NA	NA	NA	NA	both_sexes	0.31814	0.308831
ENSG00000060688	SNRNP40	NO	NA	NA	NA	NA	NA	NA	both_sexes	0.348461	0.267502
ENSG00000060709	RIMBP2	NO	NA	NA	NA	NA	NA	NA	both_sexes	0.228279	0.177274
ENSG00000060718	COL11A1	NO	NA	NA	NA	NA	NA	NA	both_sexes	0.990785	0.98728
ENSG00000060749	QSER1	NO	NA	NA	NA	NA	NA	NA	both_sexes	0.885044	0.863622
ENSG00000060762	MPC1	NO	NA	NA	NA	NA	NA	NA	both_sexes	0.447909	0.494054
ENSG00000060971	ACAA1	YES	0	0	0	0	0	0	both_sexes	0.779483	0.934663
ENSG00000060982	BCAT1	YES	0	0	0	0	0	0	both_sexes	0.593766	0.423573
ENSG00000061273	HDAC7	NO	NA	NA	NA	NA	NA	NA	both_sexes	0.451318	0.414468
ENSG00000061337	LZTS1	NO	NA	NA	NA	NA	NA	NA	both_sexes	0.323843	0.424123
ENSG00000061455	PRDM6	YES	1	0	0	0	0	1	both_sexes	0.802454	0.697984
ENSG00000061492	WNT8A	YES	1	0	0	0	0	1	both_sexes	0.668738	0.731091
ENSG00000061656	SPAG4	NO	NA	NA	NA	NA	NA	NA	both_sexes	0.590638	0.624991
ENSG00000061676	NCKAP1	NO	NA	NA	NA	NA	NA	NA	both_sexes	0.861608	0.897784
ENSG00000061794	MRPS35	NO	NA	NA	NA	NA	NA	NA	both_sexes	0.771062	0.71291
ENSG00000061918	GUCY1B1	NO	NA	NA	NA	NA	NA	NA	both_sexes	0.190123	0.179872
ENSG00000061936	SFSWAP	NO	NA	NA	NA	NA	NA	NA	both_sexes	0.652041	0.719131
ENSG00000061938	TNK2	NO	NA	NA	NA	NA	NA	NA	both_sexes	0.831811	0.798142
ENSG00000061987	MON2	NO	NA	NA	NA	NA	NA	NA	both_sexes	0.989281	0.98591
ENSG00000062038	CDH3	NO	NA	NA	NA	NA	NA	NA	both_sexes	0.996172	0.994928
ENSG00000062194	GPBP1	NO	NA	NA	NA	NA	NA	NA	both_sexes	0.0759303	0.0811546
ENSG00000062282	DGAT2	NO	NA	NA	NA	NA	NA	NA	both_sexes	0.955261	0.963221
ENSG00000062370	ZNF112	NO	NA	NA	NA	NA	NA	NA	both_sexes	0.828175	0.794724
ENSG00000062485	CS	YES	0	0	0	0	0	0	both_sexes	0.821986	0.763019
ENSG00000062524	LTK	NO	NA	NA	NA	NA	NA	NA	both_sexes	0.819535	0.789154
ENSG00000062582	MRPS24	NO	NA	NA	NA	NA	NA	NA	both_sexes	0.0179627	0.0131942
ENSG00000062598	ELMO2	YES	0	0	0	0	0	0	both_sexes	0.327181	0.28488
ENSG00000062650	WAPL	YES	0	0	0	0	0	0	both_sexes	0.236414	0.251184
ENSG00000062716	VMP1	NO	NA	NA	NA	NA	NA	NA	both_sexes	0.6614	0.653742
ENSG00000062725	APPBP2	NO	NA	NA	NA	NA	NA	NA	both_sexes	0.244967	0.273879
ENSG00000062822	POLD1	YES	0	0	0	0	0	0	both_sexes	0.731203	0.78016
ENSG00000063015	SEZ6	NO	NA	NA	NA	NA	NA	NA	both_sexes	0.976961	0.970114
ENSG00000063046	EIF4B	NO	NA	NA	NA	NA	NA	NA	both_sexes	0.487219	0.496676
ENSG00000063127	SLC6A16	NO	NA	NA	NA	NA	NA	NA	both_sexes	0.650831	0.779209
ENSG00000063169	BICRA	NO	NA	NA	NA	NA	NA	NA	both_sexes	0.752953	0.792973
ENSG00000063176	SPHK2	NO	NA	NA	NA	NA	NA	NA	both_sexes	0.65301	0.578361
ENSG00000063177	RPL18	NO	NA	NA	NA	NA	NA	NA	both_sexes	0.244759	0.316222
ENSG00000063180	CA11	NO	NA	NA	NA	NA	NA	NA	both_sexes	0.285303	0.32055
ENSG00000063241	ISOC2	NO	NA	NA	NA	NA	NA	NA	both_sexes	0.597689	0.690944
ENSG00000063244	U2AF2	NO	NA	NA	NA	NA	NA	NA	both_sexes	0.12703	0.34664
ENSG00000063245	EPN1	NO	NA	NA	NA	NA	NA	NA	both_sexes	0.0105572	0.0119693
ENSG00000063322	MED29	NO	NA	NA	NA	NA	NA	NA	both_sexes	0.305128	0.256865
ENSG00000063438	AHRR	YES	1	0	0	0	0	1	both_sexes	0.613124	0.646329
ENSG00000063515	GSC2	NO	NA	NA	NA	NA	NA	NA	both_sexes	0.0615806	0.0812908
ENSG00000063660	GPC1	NO	NA	NA	NA	NA	NA	NA	both_sexes	0.776715	0.713988
ENSG00000063761	ADCK1	NO	NA	NA	NA	NA	NA	NA	both_sexes	0.470146	0.405521
ENSG00000063854	HAGH	YES	0	0	0	0	0	0	both_sexes	0.0057011	0.00384773
ENSG00000063978	RNF4	NO	NA	NA	NA	NA	NA	NA	both_sexes	0.904347	0.885661
ENSG00000064012	CASP8	NO	NA	NA	NA	NA	NA	NA	both_sexes	0.489646	0.378774
ENSG00000064042	LIMCH1	NO	NA	NA	NA	NA	NA	NA	both_sexes	0.930843	0.949903
ENSG00000064102	INTS13	YES	0	0	0	0	0	0	both_sexes	0.800835	0.768589
ENSG00000064115	TM7SF3	YES	0	0	0	0	0	0	both_sexes	0.934152	0.91424
ENSG00000064195	DLX3	NO	NA	NA	NA	NA	NA	NA	both_sexes	0.140191	0.107038
ENSG00000064199	SPA17	NO	NA	NA	NA	NA	NA	NA	both_sexes	0.293866	0.288572
ENSG00000064201	TSPAN32	YES	0	0	0	1	0	1	both_sexes	0.0960321	0.123158
ENSG00000064205	CCN5	NO	NA	NA	NA	NA	NA	NA	both_sexes	0.199613	0.251069
ENSG00000064218	DMRT3	NO	NA	NA	NA	NA	NA	NA	both_sexes	0.902656	0.904572
ENSG00000064225	ST3GAL6	NO	NA	NA	NA	NA	NA	NA	both_sexes	0.167941	0.208082
ENSG00000064270	ATP2C2	NO	NA	NA	NA	NA	NA	NA	both_sexes	0.607781	0.727323
ENSG00000064300	NGFR	NO	NA	NA	NA	NA	NA	NA	both_sexes	0.062801	0.104728
ENSG00000064309	CDON	NO	NA	NA	NA	NA	NA	NA	both_sexes	0.302057	0.329501
ENSG00000064313	TAF2	NO	NA	NA	NA	NA	NA	NA	both_sexes	0.0127615	0.0151971
ENSG00000064393	HIPK2	NO	NA	NA	NA	NA	NA	NA	both_sexes	0.102192	0.0696612
ENSG00000064419	TNPO3	YES	0	0	0	0	0	0	both_sexes	0.00138616	0.00120431
ENSG00000064489	BORCS8-MEF2B	NO	NA	NA	NA	NA	NA	NA	both_sexes	0.995081	0.996615
ENSG00000064490	RFXANK	NO	NA	NA	NA	NA	NA	NA	both_sexes	0.792108	0.847162
ENSG00000064545	TMEM161A	NO	NA	NA	NA	NA	NA	NA	both_sexes	0.158474	0.112577
ENSG00000064547	LPAR2	NO	NA	NA	NA	NA	NA	NA	both_sexes	0.508176	0.477401
ENSG00000064601	CTSA	YES	0	0	0	0	0	0	both_sexes	0.550795	0.552584
ENSG00000064607	SUGP2	NO	NA	NA	NA	NA	NA	NA	both_sexes	0.764168	0.805628
ENSG00000064651	SLC12A2	NO	NA	NA	NA	NA	NA	NA	both_sexes	0.892545	0.87082
ENSG00000064652	SNX24	YES	0	0	0	0	0	0	both_sexes	0.947728	0.936821
ENSG00000064655	EYA2	NO	NA	NA	NA	NA	NA	NA	both_sexes	0.848913	0.84658
ENSG00000064666	CNN2	NO	NA	NA	NA	NA	NA	NA	both_sexes	0.0174667	0.0118072
ENSG00000064687	ABCA7	NO	NA	NA	NA	NA	NA	NA	both_sexes	0.124	0.106714
ENSG00000064692	SNCAIP	NO	NA	NA	NA	NA	NA	NA	both_sexes	0.871822	0.876081
ENSG00000064703	DDX20	YES	0	0	0	0	0	0	both_sexes	0.407743	0.434094
ENSG00000064726	BTBD1	NO	NA	NA	NA	NA	NA	NA	both_sexes	0.911673	0.906847
ENSG00000064763	FAR2	NO	NA	NA	NA	NA	NA	NA	both_sexes	0.865205	0.831662
ENSG00000064787	BCAS1	NO	NA	NA	NA	NA	NA	NA	both_sexes	0.400677	0.321406
ENSG00000064835	POU1F1	NO	NA	NA	NA	NA	NA	NA	both_sexes	0.00900963	0.0118098
ENSG00000064886	CHI3L2	NO	NA	NA	NA	NA	NA	NA	both_sexes	0.663001	0.62292
ENSG00000064932	SBNO2	NO	NA	NA	NA	NA	NA	NA	both_sexes	0.043925	0.0462291
ENSG00000064933	PMS1	NO	NA	NA	NA	NA	NA	NA	both_sexes	0.932398	0.943821
ENSG00000064961	HMG20B	NO	NA	NA	NA	NA	NA	NA	both_sexes	0.187278	0.134573
ENSG00000064989	CALCRL	NO	NA	NA	NA	NA	NA	NA	both_sexes	0.336597	0.46654
ENSG00000064995	TAF11	NO	NA	NA	NA	NA	NA	NA	both_sexes	0.920009	0.944117
ENSG00000064999	ANKS1A	NO	NA	NA	NA	NA	NA	NA	both_sexes	0.924251	0.949365
ENSG00000065000	AP3D1	YES	0	0	0	1	0	1	both_sexes	0.199361	0.282435
ENSG00000065029	ZNF76	NO	NA	NA	NA	NA	NA	NA	both_sexes	0.701275	0.852539
ENSG00000065054	NHERF2	NO	NA	NA	NA	NA	NA	NA	both_sexes	0.204126	0.263645
ENSG00000065057	NTHL1	YES	1	0	0	0	0	1	both_sexes	0.282563	0.509813
ENSG00000065060	BLTP3A	NO	NA	NA	NA	NA	NA	NA	both_sexes	0.612367	0.665185
ENSG00000065135	GNAI3	NO	NA	NA	NA	NA	NA	NA	both_sexes	0.117126	0.0916758
ENSG00000065150	IPO5	NO	NA	NA	NA	NA	NA	NA	both_sexes	0.93575	0.786397
ENSG00000065154	OAT	NO	NA	NA	NA	NA	NA	NA	both_sexes	0.650018	0.667574
ENSG00000065183	WDR3	NO	NA	NA	NA	NA	NA	NA	both_sexes	0.496866	0.490521
ENSG00000065243	PKN2	NO	NA	NA	NA	NA	NA	NA	both_sexes	0.948687	0.938086
ENSG00000065268	WDR18	NO	NA	NA	NA	NA	NA	NA	both_sexes	0.134059	0.163961
ENSG00000065308	TRAM2	NO	NA	NA	NA	NA	NA	NA	both_sexes	0.874681	0.857564
ENSG00000065320	NTN1	NO	NA	NA	NA	NA	NA	NA	both_sexes	0.65754	0.640022
ENSG00000065325	GLP2R	NO	NA	NA	NA	NA	NA	NA	both_sexes	0.786032	0.740202
ENSG00000065328	MCM10	NO	NA	NA	NA	NA	NA	NA	both_sexes	0.474834	0.374963
ENSG00000065357	DGKA	YES	0	0	0	0	0	0	both_sexes	0.956976	0.966239
ENSG00000065361	ERBB3	YES	0	0	0	0	0	0	both_sexes	0.742067	0.735536
ENSG00000065371	ROPN1	NO	NA	NA	NA	NA	NA	NA	both_sexes	0.771168	0.698589
ENSG00000065413	ANKRD44	YES	0	0	0	0	0	0	both_sexes	0.920519	0.781172
ENSG00000065427	KARS1	NO	NA	NA	NA	NA	NA	NA	both_sexes	0.146041	0.147902
ENSG00000065457	ADAT1	NO	NA	NA	NA	NA	NA	NA	both_sexes	0.693871	0.550227
ENSG00000065485	PDIA5	YES	0	0	0	0	0	0	both_sexes	0.501756	0.331284
ENSG00000065491	TBC1D22B	NO	NA	NA	NA	NA	NA	NA	both_sexes	0.509266	0.541421
ENSG00000065518	NDUFB4	NO	NA	NA	NA	NA	NA	NA	both_sexes	0.83604	0.832211
ENSG00000065526	SPEN	YES	1	0	0	0	0	1	both_sexes	0.426783	0.388802
ENSG00000065534	MYLK	NO	NA	NA	NA	NA	NA	NA	both_sexes	0.535417	0.39777
ENSG00000065548	ZC3H15	NO	NA	NA	NA	NA	NA	NA	both_sexes	0.271476	0.294171
ENSG00000065559	MAP2K4	NO	NA	NA	NA	NA	NA	NA	both_sexes	0.0760687	0.0756811
ENSG00000065600	PACC1	NO	NA	NA	NA	NA	NA	NA	both_sexes	0.889813	0.712314
ENSG00000065609	SNAP91	NO	NA	NA	NA	NA	NA	NA	both_sexes	0.0967208	0.127988
ENSG00000065613	SLK	YES	0	0	0	0	0	0	both_sexes	0.282753	0.290766
ENSG00000065615	CYB5R4	NO	NA	NA	NA	NA	NA	NA	both_sexes	0.00686946	0.00792839
ENSG00000065618	COL17A1	YES	0	0	0	0	0	0	both_sexes	0.0754364	0.124806
ENSG00000065621	GSTO2	YES	0	0	0	0	0	0	both_sexes	0.93994	0.936671
ENSG00000065665	SEC61A2	NO	NA	NA	NA	NA	NA	NA	both_sexes	0.880434	0.883739
ENSG00000065675	PRKCQ	NO	NA	NA	NA	NA	NA	NA	both_sexes	0.667223	0.691111
ENSG00000065717	TLE2	NO	NA	NA	NA	NA	NA	NA	both_sexes	0.816812	0.820854
ENSG00000065802	ASB1	NO	NA	NA	NA	NA	NA	NA	both_sexes	0.464791	0.426592
ENSG00000065809	FAM107B	NO	NA	NA	NA	NA	NA	NA	both_sexes	0.863693	0.811677
ENSG00000065833	ME1	NO	NA	NA	NA	NA	NA	NA	both_sexes	0.48886	0.318562
ENSG00000065882	TBC1D1	NO	NA	NA	NA	NA	NA	NA	both_sexes	0.458493	0.434488
ENSG00000065883	CDK13	NO	NA	NA	NA	NA	NA	NA	both_sexes	0.481766	0.5253
ENSG00000065911	MTHFD2	NO	NA	NA	NA	NA	NA	NA	both_sexes	0.738924	0.793034
ENSG00000065970	FOXJ2	NO	NA	NA	NA	NA	NA	NA	both_sexes	0.863452	0.863181
ENSG00000065978	YBX1	NO	NA	NA	NA	NA	NA	NA	both_sexes	0.134238	0.133783
ENSG00000065989	PDE4A	NO	NA	NA	NA	NA	NA	NA	both_sexes	0.828438	0.715094
ENSG00000066027	PPP2R5A	NO	NA	NA	NA	NA	NA	NA	both_sexes	0.85085	0.847725
ENSG00000066032	CTNNA2	NO	NA	NA	NA	NA	NA	NA	both_sexes	0.488695	0.413178
ENSG00000066044	ELAVL1	NO	NA	NA	NA	NA	NA	NA	both_sexes	0.212306	0.215224
ENSG00000066056	TIE1	NO	NA	NA	NA	NA	NA	NA	both_sexes	0.0178511	0.0186828
ENSG00000066084	DIP2B	YES	0	0	0	0	0	0	both_sexes	0.053468	0.0514182
ENSG00000066117	SMARCD1	NO	NA	NA	NA	NA	NA	NA	both_sexes	0.210407	0.280581
ENSG00000066135	KDM4A	NO	NA	NA	NA	NA	NA	NA	both_sexes	0.160393	0.136211
ENSG00000066136	NFYC	YES	0	0	0	1	0	1	both_sexes	0.790439	0.834115
ENSG00000066185	ZMYND12	YES	0	0	0	0	0	0	both_sexes	0.562484	0.464138
ENSG00000066230	SLC9A3	YES	0	0	0	0	0	0	both_sexes	0.00415668	0.00347165
ENSG00000066248	NGEF	NO	NA	NA	NA	NA	NA	NA	both_sexes	0.831553	0.768715
ENSG00000066279	ASPM	NO	NA	NA	NA	NA	NA	NA	both_sexes	0.451906	0.654557
ENSG00000066294	CD84	NO	NA	NA	NA	NA	NA	NA	both_sexes	0.592146	0.632291
ENSG00000066322	ELOVL1	NO	NA	NA	NA	NA	NA	NA	both_sexes	0.0575183	0.0568034
ENSG00000066336	SPI1	NO	NA	NA	NA	NA	NA	NA	both_sexes	0.0476867	0.308368
ENSG00000066379	POLR1H	NO	NA	NA	NA	NA	NA	NA	both_sexes	0.33121	0.344102
ENSG00000066382	MPPED2	YES	1	0	1	0	0	2	both_sexes	0.674049	0.680991
ENSG00000066405	CLDN18	NO	NA	NA	NA	NA	NA	NA	both_sexes	0.968427	0.978959
ENSG00000066422	ZBTB11	NO	NA	NA	NA	NA	NA	NA	both_sexes	0.0123645	0.0107163
ENSG00000066427	ATXN3	NO	NA	NA	NA	NA	NA	NA	both_sexes	0.703991	0.732952
ENSG00000066455	GOLGA5	NO	NA	NA	NA	NA	NA	NA	both_sexes	0.583152	0.525407
ENSG00000066468	FGFR2	YES	1	1	0	0	0	2	both_sexes	0.893808	0.896233
ENSG00000066557	LRRC40	NO	NA	NA	NA	NA	NA	NA	both_sexes	0.954228	0.970386
ENSG00000066583	ISOC1	YES	0	0	0	1	0	1	both_sexes	0.353564	0.31611
ENSG00000066629	EML1	NO	NA	NA	NA	NA	NA	NA	both_sexes	0.774952	0.877504
ENSG00000066651	TRMT11	NO	NA	NA	NA	NA	NA	NA	both_sexes	0.451895	0.480484
ENSG00000066654	THUMPD1	NO	NA	NA	NA	NA	NA	NA	both_sexes	0.87169	0.848636
ENSG00000066697	MSANTD3	NO	NA	NA	NA	NA	NA	NA	both_sexes	0.397954	0.256128
ENSG00000066735	KIF26A	NO	NA	NA	NA	NA	NA	NA	both_sexes	0.925551	0.594624
ENSG00000066739	ATG2B	NO	NA	NA	NA	NA	NA	NA	both_sexes	0.741343	0.798404
ENSG00000066777	ARFGEF1	NO	NA	NA	NA	NA	NA	NA	both_sexes	0.224347	0.375174
ENSG00000066813	ACSM2B	NO	NA	NA	NA	NA	NA	NA	both_sexes	0.494566	0.571603
ENSG00000066827	ZFAT	YES	0	0	0	0	0	0	both_sexes	3.60587e-05	4.05169e-05
ENSG00000066855	MTFR1	NO	NA	NA	NA	NA	NA	NA	both_sexes	0.600362	0.858251
ENSG00000066923	STAG3	NO	NA	NA	NA	NA	NA	NA	both_sexes	0.992504	0.995307
ENSG00000066926	FECH	NO	NA	NA	NA	NA	NA	NA	both_sexes	0.756792	0.787192
ENSG00000066933	MYO9A	NO	NA	NA	NA	NA	NA	NA	both_sexes	0.167623	0.0971475
ENSG00000067057	PFKP	NO	NA	NA	NA	NA	NA	NA	both_sexes	0.808965	0.733464
ENSG00000067064	IDI1	NO	NA	NA	NA	NA	NA	NA	both_sexes	0.453311	0.540172
ENSG00000067066	SP100	NO	NA	NA	NA	NA	NA	NA	both_sexes	0.822809	0.855103
ENSG00000067082	KLF6	NO	NA	NA	NA	NA	NA	NA	both_sexes	0.575223	0.691555
ENSG00000067113	PLPP1	NO	NA	NA	NA	NA	NA	NA	both_sexes	0.634294	0.635477
ENSG00000067141	NEO1	YES	1	0	0	0	0	1	both_sexes	0.0518976	0.0351016
ENSG00000067167	TRAM1	YES	0	0	0	0	0	0	both_sexes	0.285878	0.36714
ENSG00000067182	TNFRSF1A	NO	NA	NA	NA	NA	NA	NA	both_sexes	0.816035	0.807626
ENSG00000067191	CACNB1	NO	NA	NA	NA	NA	NA	NA	both_sexes	0.573375	0.729077
ENSG00000067208	EVI5	NO	NA	NA	NA	NA	NA	NA	both_sexes	0.0582844	0.0623768
ENSG00000067221	STOML1	YES	0	0	0	0	0	0	both_sexes	0.353392	0.257529
ENSG00000067225	PKM	NO	NA	NA	NA	NA	NA	NA	both_sexes	0.988234	0.985632
ENSG00000067248	DHX29	NO	NA	NA	NA	NA	NA	NA	both_sexes	0.728141	0.796063
ENSG00000067334	DNTTIP2	NO	NA	NA	NA	NA	NA	NA	both_sexes	0.720406	0.785301
ENSG00000067365	METTL22	NO	NA	NA	NA	NA	NA	NA	both_sexes	0.0870809	0.134845
ENSG00000067369	TP53BP1	NO	NA	NA	NA	NA	NA	NA	both_sexes	0.101881	0.0943974
ENSG00000067533	RRP15	YES	0	0	0	0	0	0	both_sexes	0.14497	0.130481
ENSG00000067560	RHOA	NO	NA	NA	NA	NA	NA	NA	both_sexes	0.834402	0.880702
ENSG00000067596	DHX8	NO	NA	NA	NA	NA	NA	NA	both_sexes	0.341623	0.355505
ENSG00000067606	PRKCZ	NO	NA	NA	NA	NA	NA	NA	both_sexes	0.271407	0.284633
ENSG00000067704	IARS2	NO	NA	NA	NA	NA	NA	NA	both_sexes	0.145792	0.118409
ENSG00000067715	SYT1	NO	NA	NA	NA	NA	NA	NA	both_sexes	0.12364	0.148258
ENSG00000067798	NAV3	NO	NA	NA	NA	NA	NA	NA	both_sexes	0.0694131	0.050038
ENSG00000067836	ROGDI	NO	NA	NA	NA	NA	NA	NA	both_sexes	0.573093	0.598149
ENSG00000067900	ROCK1	NO	NA	NA	NA	NA	NA	NA	both_sexes	0.437461	0.220118
ENSG00000067955	CBFB	NO	NA	NA	NA	NA	NA	NA	both_sexes	0.871768	0.832627
ENSG00000068001	HYAL2	NO	NA	NA	NA	NA	NA	NA	both_sexes	0.0350341	0.0469751
ENSG00000068024	HDAC4	NO	NA	NA	NA	NA	NA	NA	both_sexes	0.584611	0.654875
ENSG00000068028	RASSF1	NO	NA	NA	NA	NA	NA	NA	both_sexes	0.778946	0.845117
ENSG00000068078	FGFR3	NO	NA	NA	NA	NA	NA	NA	both_sexes	0.952851	0.964745
ENSG00000068079	IFI35	NO	NA	NA	NA	NA	NA	NA	both_sexes	0.479579	0.549819
ENSG00000068097	HEATR6	NO	NA	NA	NA	NA	NA	NA	both_sexes	0.805559	0.808104
ENSG00000068120	COASY	NO	NA	NA	NA	NA	NA	NA	both_sexes	0.886598	0.911667
ENSG00000068137	PLEKHH3	NO	NA	NA	NA	NA	NA	NA	both_sexes	0.00238628	0.283509
ENSG00000068305	MEF2A	NO	NA	NA	NA	NA	NA	NA	both_sexes	0.406905	0.349719
ENSG00000068383	INPP5A	NO	NA	NA	NA	NA	NA	NA	both_sexes	0.207757	0.175747
ENSG00000068489	PRR11	NO	NA	NA	NA	NA	NA	NA	both_sexes	0.0745883	0.116072
ENSG00000068615	REEP1	YES	0	0	0	1	0	1	both_sexes	0.983563	0.989148
ENSG00000068650	ATP11A	NO	NA	NA	NA	NA	NA	NA	both_sexes	0.268581	0.291459
ENSG00000068654	POLR1A	YES	0	0	0	0	0	0	both_sexes	0.0842343	0.602266
ENSG00000068697	LAPTM4A	NO	NA	NA	NA	NA	NA	NA	both_sexes	0.582853	0.527273
ENSG00000068724	TTC7A	NO	NA	NA	NA	NA	NA	NA	both_sexes	0.32752	0.320503
ENSG00000068745	IP6K2	NO	NA	NA	NA	NA	NA	NA	both_sexes	0.26538	0.214956
ENSG00000068781	STON1-GTF2A1L	NO	NA	NA	NA	NA	NA	NA	both_sexes	0.69073	0.865453
ENSG00000068784	SRBD1	NO	NA	NA	NA	NA	NA	NA	both_sexes	0.450541	0.481383
ENSG00000068796	KIF2A	NO	NA	NA	NA	NA	NA	NA	both_sexes	0.561349	0.619615
ENSG00000068831	RASGRP2	NO	NA	NA	NA	NA	NA	NA	both_sexes	0.9798	0.986673
ENSG00000068878	PSME4	NO	NA	NA	NA	NA	NA	NA	both_sexes	0.00922901	0.0115255
ENSG00000068885	IFT80	NO	NA	NA	NA	NA	NA	NA	both_sexes	0.721877	0.469892
ENSG00000068903	SIRT2	NO	NA	NA	NA	NA	NA	NA	both_sexes	0.171628	0.240998
ENSG00000068912	ERLEC1	NO	NA	NA	NA	NA	NA	NA	both_sexes	0.28966	0.242204
ENSG00000068971	PPP2R5B	NO	NA	NA	NA	NA	NA	NA	both_sexes	0.993301	0.991004
ENSG00000068976	PYGM	NO	NA	NA	NA	NA	NA	NA	both_sexes	0.827511	0.516812
ENSG00000069011	PITX1	NO	NA	NA	NA	NA	NA	NA	both_sexes	0.370633	0.462228
ENSG00000069018	TRPC7	NO	NA	NA	NA	NA	NA	NA	both_sexes	0.762525	0.692489
ENSG00000069020	MAST4	NO	NA	NA	NA	NA	NA	NA	both_sexes	0.0936204	0.0700042
ENSG00000069122	ADGRF5	NO	NA	NA	NA	NA	NA	NA	both_sexes	0.0639601	0.0706612
ENSG00000069188	SDK2	NO	NA	NA	NA	NA	NA	NA	both_sexes	0.778742	0.626955
ENSG00000069206	ADAM7	NO	NA	NA	NA	NA	NA	NA	both_sexes	0.958426	0.967075
ENSG00000069248	NUP133	NO	NA	NA	NA	NA	NA	NA	both_sexes	0.898203	0.923852
ENSG00000069275	NUCKS1	YES	1	0	1	0	0	2	both_sexes	0.999201	0.999001
ENSG00000069329	VPS35	NO	NA	NA	NA	NA	NA	NA	both_sexes	0.103854	0.119413
ENSG00000069345	DNAJA2	NO	NA	NA	NA	NA	NA	NA	both_sexes	0.25174	0.295231
ENSG00000069399	BCL3	YES	0	0	0	0	0	0	both_sexes	0.79736	0.809811
ENSG00000069424	KCNAB2	NO	NA	NA	NA	NA	NA	NA	both_sexes	0.344664	0.551434
ENSG00000069431	ABCC9	NO	NA	NA	NA	NA	NA	NA	both_sexes	0.916205	0.941827
ENSG00000069482	GAL	NO	NA	NA	NA	NA	NA	NA	both_sexes	0.960862	0.945786
ENSG00000069493	CLEC2D	NO	NA	NA	NA	NA	NA	NA	both_sexes	0.527886	0.636399
ENSG00000069667	RORA	NO	NA	NA	NA	NA	NA	NA	both_sexes	0.1884	0.228922
ENSG00000069696	DRD4	NO	NA	NA	NA	NA	NA	NA	both_sexes	0.524285	0.535462
ENSG00000069702	TGFBR3	NO	NA	NA	NA	NA	NA	NA	both_sexes	0.0194809	0.0194758
ENSG00000069764	PLA2G10	NO	NA	NA	NA	NA	NA	NA	both_sexes	0.374794	0.188582
ENSG00000069812	HES2	NO	NA	NA	NA	NA	NA	NA	both_sexes	0.20569	0.297527
ENSG00000069849	ATP1B3	YES	0	0	0	0	0	0	both_sexes	0.577049	0.538752
ENSG00000069869	NEDD4	NO	NA	NA	NA	NA	NA	NA	both_sexes	0.43588	0.461814
ENSG00000069943	PIGB	NO	NA	NA	NA	NA	NA	NA	both_sexes	0.914716	0.86682
ENSG00000069956	MAPK6	NO	NA	NA	NA	NA	NA	NA	both_sexes	0.875238	0.880588
ENSG00000069966	GNB5	NO	NA	NA	NA	NA	NA	NA	both_sexes	0.621274	0.539413
ENSG00000069974	RAB27A	NO	NA	NA	NA	NA	NA	NA	both_sexes	0.997817	0.997069
ENSG00000069998	HDHD5	NO	NA	NA	NA	NA	NA	NA	both_sexes	0.078706	0.0612557
ENSG00000070010	UFD1	NO	NA	NA	NA	NA	NA	NA	both_sexes	0.773277	0.724665
ENSG00000070018	LRP6	NO	NA	NA	NA	NA	NA	NA	both_sexes	0.194491	0.209857
ENSG00000070019	GUCY2C	NO	NA	NA	NA	NA	NA	NA	both_sexes	0.596417	0.732766
ENSG00000070031	SCT	NO	NA	NA	NA	NA	NA	NA	both_sexes	0.766441	0.753583
ENSG00000070047	PHRF1	NO	NA	NA	NA	NA	NA	NA	both_sexes	0.852032	0.879755
ENSG00000070061	ELP1	NO	NA	NA	NA	NA	NA	NA	both_sexes	0.915014	0.940355
ENSG00000070081	NUCB2	NO	NA	NA	NA	NA	NA	NA	both_sexes	0.0178304	0.0222549
ENSG00000070087	PFN2	NO	NA	NA	NA	NA	NA	NA	both_sexes	0.869512	0.913596
ENSG00000070159	PTPN3	NO	NA	NA	NA	NA	NA	NA	both_sexes	0.601409	0.600195
ENSG00000070182	SPTB	NO	NA	NA	NA	NA	NA	NA	both_sexes	0.291584	0.284866
ENSG00000070190	DAPP1	NO	NA	NA	NA	NA	NA	NA	both_sexes	0.0359665	0.0246853
ENSG00000070193	FGF10	NO	NA	NA	NA	NA	NA	NA	both_sexes	0.848122	0.864215
ENSG00000070214	SLC44A1	NO	NA	NA	NA	NA	NA	NA	both_sexes	0.584159	0.510626
ENSG00000070269	TMEM260	NO	NA	NA	NA	NA	NA	NA	both_sexes	0.0583972	0.0760216
ENSG00000070366	SMG6	YES	1	0	0	0	0	1	both_sexes	0.188405	0.16824
ENSG00000070367	EXOC5	NO	NA	NA	NA	NA	NA	NA	both_sexes	0.117175	0.180079
ENSG00000070371	CLTCL1	NO	NA	NA	NA	NA	NA	NA	both_sexes	0.349408	0.222727
ENSG00000070388	FGF22	NO	NA	NA	NA	NA	NA	NA	both_sexes	0.753554	0.77806
ENSG00000070404	FSTL3	NO	NA	NA	NA	NA	NA	NA	both_sexes	0.93237	0.94055
ENSG00000070413	DGCR2	NO	NA	NA	NA	NA	NA	NA	both_sexes	0.216615	0.196074
ENSG00000070423	RNF126	NO	NA	NA	NA	NA	NA	NA	both_sexes	0.351452	0.358554
ENSG00000070444	MNT	YES	0	0	0	0	0	0	both_sexes	0.961859	0.974218
ENSG00000070476	ZXDC	NO	NA	NA	NA	NA	NA	NA	both_sexes	0.73696	0.729051
ENSG00000070495	JMJD6	NO	NA	NA	NA	NA	NA	NA	both_sexes	0.896636	0.915187
ENSG00000070501	POLB	NO	NA	NA	NA	NA	NA	NA	both_sexes	0.313332	0.295454
ENSG00000070526	ST6GALNAC1	NO	NA	NA	NA	NA	NA	NA	both_sexes	0.839402	0.878232
ENSG00000070540	WIPI1	NO	NA	NA	NA	NA	NA	NA	both_sexes	0.844858	0.832332
ENSG00000070601	FRMPD1	NO	NA	NA	NA	NA	NA	NA	both_sexes	0.26109	0.207354
ENSG00000070610	GBA2	NO	NA	NA	NA	NA	NA	NA	both_sexes	0.266693	0.212604
ENSG00000070614	NDST1	NO	NA	NA	NA	NA	NA	NA	both_sexes	0.382785	0.47571
ENSG00000070669	ASNS	NO	NA	NA	NA	NA	NA	NA	both_sexes	0.988696	0.985031
ENSG00000070718	AP3M2	NO	NA	NA	NA	NA	NA	NA	both_sexes	0.795946	0.728691
ENSG00000070729	CNGB1	NO	NA	NA	NA	NA	NA	NA	both_sexes	0.711758	0.613523
ENSG00000070731	ST6GALNAC2	NO	NA	NA	NA	NA	NA	NA	both_sexes	0.889762	0.869869
ENSG00000070748	CHAT	YES	0	0	0	0	0	0	both_sexes	0.912568	0.934857
ENSG00000070756	PABPC1	NO	NA	NA	NA	NA	NA	NA	both_sexes	0.358401	0.230363
ENSG00000070759	TESK2	NO	NA	NA	NA	NA	NA	NA	both_sexes	0.297899	0.444918
ENSG00000070761	CFAP20	NO	NA	NA	NA	NA	NA	NA	both_sexes	0.203959	0.170577
ENSG00000070770	CSNK2A2	NO	NA	NA	NA	NA	NA	NA	both_sexes	0.950952	0.936154
ENSG00000070778	PTPN21	NO	NA	NA	NA	NA	NA	NA	both_sexes	0.935751	0.950319
ENSG00000070785	EIF2B3	NO	NA	NA	NA	NA	NA	NA	both_sexes	0.101682	0.0997762
ENSG00000070808	CAMK2A	NO	NA	NA	NA	NA	NA	NA	both_sexes	0.0876493	0.102251
ENSG00000070814	TCOF1	NO	NA	NA	NA	NA	NA	NA	both_sexes	0.573512	0.689863
ENSG00000070831	CDC42	YES	0	0	0	0	0	0	both_sexes	0.932872	0.932872
ENSG00000070882	OSBPL3	NO	NA	NA	NA	NA	NA	NA	both_sexes	0.0834372	0.0566486
ENSG00000070886	EPHA8	NO	NA	NA	NA	NA	NA	NA	both_sexes	0.745137	0.723689
ENSG00000070915	SLC12A3	NO	NA	NA	NA	NA	NA	NA	both_sexes	0.872546	0.895419
ENSG00000070950	RAD18	NO	NA	NA	NA	NA	NA	NA	both_sexes	0.890299	0.919708
ENSG00000070961	ATP2B1	YES	0	0	0	0	0	0	both_sexes	0.167105	0.143733
ENSG00000070985	TRPM5	NO	NA	NA	NA	NA	NA	NA	both_sexes	0.429573	0.448252
ENSG00000071051	NCK2	NO	NA	NA	NA	NA	NA	NA	both_sexes	0.988148	0.984696
ENSG00000071054	MAP4K4	NO	NA	NA	NA	NA	NA	NA	both_sexes	0.139354	0.139507
ENSG00000071073	MGAT4A	NO	NA	NA	NA	NA	NA	NA	both_sexes	0.462933	0.506082
ENSG00000071082	RPL31	NO	NA	NA	NA	NA	NA	NA	both_sexes	0.558524	0.511516
ENSG00000071127	WDR1	YES	1	0	1	0	0	2	both_sexes	0.0180737	0.0209782
ENSG00000071189	SNX13	NO	NA	NA	NA	NA	NA	NA	both_sexes	0.318617	0.299537
ENSG00000071203	MS4A12	NO	NA	NA	NA	NA	NA	NA	both_sexes	0.0584741	0.79262
ENSG00000071205	ARHGAP10	YES	1	0	0	0	0	1	both_sexes	0.807394	0.752944
ENSG00000071242	RPS6KA2	NO	NA	NA	NA	NA	NA	NA	both_sexes	0.637119	0.706312
ENSG00000071243	ING3	NO	NA	NA	NA	NA	NA	NA	both_sexes	0.756194	0.682615
ENSG00000071246	VASH1	YES	0	0	0	0	0	0	both_sexes	0.959461	0.972516
ENSG00000071282	LMCD1	NO	NA	NA	NA	NA	NA	NA	both_sexes	0.805035	0.854775
ENSG00000071462	BUD23	NO	NA	NA	NA	NA	NA	NA	both_sexes	0.490099	0.58657
ENSG00000071537	SEL1L	NO	NA	NA	NA	NA	NA	NA	both_sexes	0.36774	0.463958
ENSG00000071539	TRIP13	NO	NA	NA	NA	NA	NA	NA	both_sexes	0.62637	0.658639
ENSG00000071564	TCF3	NO	NA	NA	NA	NA	NA	NA	both_sexes	0.84875	0.849679
ENSG00000071575	TRIB2	NO	NA	NA	NA	NA	NA	NA	both_sexes	0.379699	0.368515
ENSG00000071626	DAZAP1	NO	NA	NA	NA	NA	NA	NA	both_sexes	0.512577	0.397833
ENSG00000071655	MBD3	NO	NA	NA	NA	NA	NA	NA	both_sexes	0.891498	0.897541
ENSG00000071677	PRLH	YES	0	0	0	0	0	0	both_sexes	0.6904	0.6221
ENSG00000071794	HLTF	YES	1	0	0	0	0	1	both_sexes	0.0375503	0.0792376
ENSG00000071894	CPSF1	YES	0	0	0	0	0	0	both_sexes	0.791716	0.553811
ENSG00000071909	MYO3B	NO	NA	NA	NA	NA	NA	NA	both_sexes	0.0553316	0.0377419
ENSG00000071967	CYBRD1	NO	NA	NA	NA	NA	NA	NA	both_sexes	0.183089	0.156311
ENSG00000071991	CDH19	NO	NA	NA	NA	NA	NA	NA	both_sexes	0.945704	0.964663
ENSG00000071994	PDCD2	NO	NA	NA	NA	NA	NA	NA	both_sexes	0.832646	0.791249
ENSG00000072041	SLC6A15	NO	NA	NA	NA	NA	NA	NA	both_sexes	0.135897	0.0796371
ENSG00000072042	RDH11	NO	NA	NA	NA	NA	NA	NA	both_sexes	0.878269	0.880852
ENSG00000072062	PRKACA	NO	NA	NA	NA	NA	NA	NA	both_sexes	0.57439	0.410453
ENSG00000072071	ADGRL1	NO	NA	NA	NA	NA	NA	NA	both_sexes	0.0453237	0.0308576
ENSG00000072080	SPP2	NO	NA	NA	NA	NA	NA	NA	both_sexes	0.961768	0.974628
ENSG00000072110	ACTN1	NO	NA	NA	NA	NA	NA	NA	both_sexes	0.729806	0.770547
ENSG00000072121	ZFYVE26	NO	NA	NA	NA	NA	NA	NA	both_sexes	0.0343698	0.0439017
ENSG00000072134	EPN2	NO	NA	NA	NA	NA	NA	NA	both_sexes	0.412184	0.909695
ENSG00000072135	PTPN18	NO	NA	NA	NA	NA	NA	NA	both_sexes	0.337316	0.308575
ENSG00000072163	LIMS2	NO	NA	NA	NA	NA	NA	NA	both_sexes	0.162029	0.133484
ENSG00000072182	ASIC4	NO	NA	NA	NA	NA	NA	NA	both_sexes	0.0674103	0.067353
ENSG00000072195	SPEG	NO	NA	NA	NA	NA	NA	NA	both_sexes	0.900263	0.917506
ENSG00000072201	LNX1	NO	NA	NA	NA	NA	NA	NA	both_sexes	0.622538	0.60942
ENSG00000072210	ALDH3A2	NO	NA	NA	NA	NA	NA	NA	both_sexes	0.961203	0.955773
ENSG00000072274	TFRC	NO	NA	NA	NA	NA	NA	NA	both_sexes	0.524521	0.43854
ENSG00000072310	SREBF1	NO	NA	NA	NA	NA	NA	NA	both_sexes	0.327963	0.291053
ENSG00000072364	AFF4	NO	NA	NA	NA	NA	NA	NA	both_sexes	0.168023	0.166878
ENSG00000072401	UBE2D1	NO	NA	NA	NA	NA	NA	NA	both_sexes	0.253711	0.289073
ENSG00000072415	PALS1	NO	NA	NA	NA	NA	NA	NA	both_sexes	0.142215	0.163728
ENSG00000072422	RHOBTB1	NO	NA	NA	NA	NA	NA	NA	both_sexes	0.851746	0.889794
ENSG00000072518	MARK2	NO	NA	NA	NA	NA	NA	NA	both_sexes	0.452448	0.476157
ENSG00000072571	HMMR	NO	NA	NA	NA	NA	NA	NA	both_sexes	0.552571	0.324296
ENSG00000072609	CHFR	YES	0	0	0	0	0	0	both_sexes	0.834007	0.786247
ENSG00000072657	TRHDE	NO	NA	NA	NA	NA	NA	NA	both_sexes	0.882999	0.851094
ENSG00000072682	P4HA2	NO	NA	NA	NA	NA	NA	NA	both_sexes	0.00551592	0.00729262
ENSG00000072694	FCGR2B	NO	NA	NA	NA	NA	NA	NA	both_sexes	0.73352	0.75567
ENSG00000072736	NFATC3	NO	NA	NA	NA	NA	NA	NA	both_sexes	0.0593117	0.0685834
ENSG00000072756	TRNT1	NO	NA	NA	NA	NA	NA	NA	both_sexes	0.263578	0.223671
ENSG00000072778	ACADVL	YES	0	0	0	1	0	1	both_sexes	0.289157	0.323774
ENSG00000072786	STK10	NO	NA	NA	NA	NA	NA	NA	both_sexes	0.942092	0.960692
ENSG00000072803	FBXW11	NO	NA	NA	NA	NA	NA	NA	both_sexes	0.695609	0.595379
ENSG00000072818	ACAP1	YES	0	0	0	0	0	0	both_sexes	0.915385	0.941899
ENSG00000072832	CRMP1	NO	NA	NA	NA	NA	NA	NA	both_sexes	0.0603903	0.0511579
ENSG00000072840	EVC	NO	NA	NA	NA	NA	NA	NA	both_sexes	0.830986	0.863297
ENSG00000072849	DERL2	NO	NA	NA	NA	NA	NA	NA	both_sexes	0.300557	0.291883
ENSG00000072858	SIDT1	NO	NA	NA	NA	NA	NA	NA	both_sexes	0.0665011	0.0583174
ENSG00000072864	NDE1	YES	0	0	0	0	0	0	both_sexes	0.18906	0.213806
ENSG00000072952	IRAG1	NO	NA	NA	NA	NA	NA	NA	both_sexes	0.0640126	0.0542431
ENSG00000072954	TMEM38A	NO	NA	NA	NA	NA	NA	NA	both_sexes	0.694906	0.770466
ENSG00000072958	AP1M1	NO	NA	NA	NA	NA	NA	NA	both_sexes	0.856077	0.849955
ENSG00000073008	PVR	YES	0	0	0	0	0	0	both_sexes	0.937017	0.923047
ENSG00000073050	XRCC1	NO	NA	NA	NA	NA	NA	NA	both_sexes	0.46158	0.465491
ENSG00000073060	SCARB1	NO	NA	NA	NA	NA	NA	NA	both_sexes	0.866805	0.848888
ENSG00000073067	CYP2W1	YES	0	0	0	0	0	0	both_sexes	0.801358	0.784345
ENSG00000073111	MCM2	NO	NA	NA	NA	NA	NA	NA	both_sexes	0.331907	0.297738
ENSG00000073146	MOV10L1	NO	NA	NA	NA	NA	NA	NA	both_sexes	0.326803	0.415629
ENSG00000073150	PANX2	NO	NA	NA	NA	NA	NA	NA	both_sexes	0.187458	0.150104
ENSG00000073169	SELENOO	NO	NA	NA	NA	NA	NA	NA	both_sexes	0.263475	0.252359
ENSG00000073282	TP63	NO	NA	NA	NA	NA	NA	NA	both_sexes	0.940255	0.934597
ENSG00000073331	ALPK1	YES	0	0	0	0	0	0	both_sexes	0.770383	0.803477
ENSG00000073350	LLGL2	NO	NA	NA	NA	NA	NA	NA	both_sexes	0.954766	0.970488
ENSG00000073417	PDE8A	NO	NA	NA	NA	NA	NA	NA	both_sexes	0.285152	0.369972
ENSG00000073536	NLE1	NO	NA	NA	NA	NA	NA	NA	both_sexes	0.870474	0.837268
ENSG00000073578	SDHA	YES	0	0	0	1	0	1	both_sexes	0.01011	0.00793836
ENSG00000073584	SMARCE1	NO	NA	NA	NA	NA	NA	NA	both_sexes	0.936051	0.957014
ENSG00000073598	FNDC8	NO	NA	NA	NA	NA	NA	NA	both_sexes	0.962957	0.919119
ENSG00000073605	GSDMB	YES	1	0	0	0	1	2	both_sexes	0.23063	0.222601
ENSG00000073614	KDM5A	NO	NA	NA	NA	NA	NA	NA	both_sexes	0.122041	0.0807402
ENSG00000073670	ADAM11	NO	NA	NA	NA	NA	NA	NA	both_sexes	0.765839	0.74998
ENSG00000073711	PPP2R3A	YES	0	0	0	1	0	1	both_sexes	0.518726	0.491176
ENSG00000073712	FERMT2	NO	NA	NA	NA	NA	NA	NA	both_sexes	0.0134295	0.0132721
ENSG00000073734	ABCB11	NO	NA	NA	NA	NA	NA	NA	both_sexes	0.986377	0.989148
ENSG00000073737	DHRS9	NO	NA	NA	NA	NA	NA	NA	both_sexes	0.192749	0.158183
ENSG00000073754	CD5L	NO	NA	NA	NA	NA	NA	NA	both_sexes	0.610468	0.721702
ENSG00000073756	PTGS2	NO	NA	NA	NA	NA	NA	NA	both_sexes	0.791083	0.719572
ENSG00000073792	IGF2BP2	NO	NA	NA	NA	NA	NA	NA	both_sexes	0.119181	0.1128
ENSG00000073803	MAP3K13	NO	NA	NA	NA	NA	NA	NA	both_sexes	0.858424	0.863837
ENSG00000073849	ST6GAL1	NO	NA	NA	NA	NA	NA	NA	both_sexes	0.719875	0.671467
ENSG00000073861	TBX21	NO	NA	NA	NA	NA	NA	NA	both_sexes	0.724219	0.757468
ENSG00000073910	FRY	NO	NA	NA	NA	NA	NA	NA	both_sexes	0.602324	0.512251
ENSG00000073921	PICALM	NO	NA	NA	NA	NA	NA	NA	both_sexes	0.280221	0.275096
ENSG00000073969	NSF	YES	1	0	0	0	0	1	both_sexes	0.0547453	0.0597843
ENSG00000074047	GLI2	NO	NA	NA	NA	NA	NA	NA	both_sexes	0.804886	0.851441
ENSG00000074054	CLASP1	NO	NA	NA	NA	NA	NA	NA	both_sexes	0.321102	0.374495
ENSG00000074071	MRPS34	YES	0	0	0	0	0	0	both_sexes	0.891069	0.94108
ENSG00000074181	NOTCH3	NO	NA	NA	NA	NA	NA	NA	both_sexes	0.850653	0.902025
ENSG00000074201	CLNS1A	NO	NA	NA	NA	NA	NA	NA	both_sexes	0.0912708	0.101031
ENSG00000074211	PPP2R2C	NO	NA	NA	NA	NA	NA	NA	both_sexes	0.0724349	0.0841684
ENSG00000074219	TEAD2	NO	NA	NA	NA	NA	NA	NA	both_sexes	0.114516	0.103586
ENSG00000074266	EED	NO	NA	NA	NA	NA	NA	NA	both_sexes	0.937698	0.92487
ENSG00000074276	CDHR2	NO	NA	NA	NA	NA	NA	NA	both_sexes	0.859599	0.637165
ENSG00000074317	SNCB	NO	NA	NA	NA	NA	NA	NA	both_sexes	0.167194	0.193904
ENSG00000074319	TSG101	NO	NA	NA	NA	NA	NA	NA	both_sexes	0.85245	0.851572
ENSG00000074356	NCBP3	YES	0	0	0	0	0	0	both_sexes	0.28275	0.31516
ENSG00000074370	ATP2A3	YES	0	0	0	0	0	0	both_sexes	0.159363	0.163182
ENSG00000074410	CA12	YES	0	0	0	0	0	0	both_sexes	0.0899952	0.118412
ENSG00000074416	MGLL	NO	NA	NA	NA	NA	NA	NA	both_sexes	0.838193	0.772253
ENSG00000074527	NTN4	NO	NA	NA	NA	NA	NA	NA	both_sexes	0.0652307	0.0882827
ENSG00000074582	BCS1L	NO	NA	NA	NA	NA	NA	NA	both_sexes	0.691463	0.744976
ENSG00000074590	NUAK1	NO	NA	NA	NA	NA	NA	NA	both_sexes	0.687472	0.682763
ENSG00000074603	DPP8	NO	NA	NA	NA	NA	NA	NA	both_sexes	0.623416	0.583988
ENSG00000074621	SLC24A1	NO	NA	NA	NA	NA	NA	NA	both_sexes	0.0872316	0.0676101
ENSG00000074657	ZNF532	NO	NA	NA	NA	NA	NA	NA	both_sexes	0.54602	0.444728
ENSG00000074660	SCARF1	YES	0	0	0	0	0	0	both_sexes	0.470857	0.453114
ENSG00000074695	LMAN1	NO	NA	NA	NA	NA	NA	NA	both_sexes	0.414223	0.420324
ENSG00000074696	HACD3	NO	NA	NA	NA	NA	NA	NA	both_sexes	0.945852	0.935199
ENSG00000074706	IPCEF1	NO	NA	NA	NA	NA	NA	NA	both_sexes	0.919198	0.919346
ENSG00000074755	ZZEF1	YES	0	0	0	0	0	0	both_sexes	0.02859	0.0314716
ENSG00000074771	NOX3	NO	NA	NA	NA	NA	NA	NA	both_sexes	0.087617	0.0610754
ENSG00000074800	ENO1	NO	NA	NA	NA	NA	NA	NA	both_sexes	0.602624	0.633214
ENSG00000074803	SLC12A1	NO	NA	NA	NA	NA	NA	NA	both_sexes	0.535874	0.402397
ENSG00000074842	MYDGF	YES	0	0	0	0	0	0	both_sexes	0.294969	0.204275
ENSG00000074855	ANO8	NO	NA	NA	NA	NA	NA	NA	both_sexes	0.0798198	0.148881
ENSG00000074935	TUBE1	NO	NA	NA	NA	NA	NA	NA	both_sexes	0.838167	0.834371
ENSG00000074964	ARHGEF10L	NO	NA	NA	NA	NA	NA	NA	both_sexes	0.429334	0.542398
ENSG00000074966	TXK	NO	NA	NA	NA	NA	NA	NA	both_sexes	0.105807	0.0852876
ENSG00000075035	WSCD2	NO	NA	NA	NA	NA	NA	NA	both_sexes	0.290827	0.244591
ENSG00000075043	KCNQ2	NO	NA	NA	NA	NA	NA	NA	both_sexes	0.344422	0.312515
ENSG00000075073	TACR2	NO	NA	NA	NA	NA	NA	NA	both_sexes	0.621216	0.172779
ENSG00000075089	ACTR6	NO	NA	NA	NA	NA	NA	NA	both_sexes	0.690033	0.687322
ENSG00000075131	TIPIN	NO	NA	NA	NA	NA	NA	NA	both_sexes	0.952937	0.968253
ENSG00000075142	SRI	NO	NA	NA	NA	NA	NA	NA	both_sexes	0.946363	0.942016
ENSG00000075151	EIF4G3	NO	NA	NA	NA	NA	NA	NA	both_sexes	0.258663	0.258603
ENSG00000075188	NUP37	NO	NA	NA	NA	NA	NA	NA	both_sexes	0.92061	0.914672
ENSG00000075213	SEMA3A	NO	NA	NA	NA	NA	NA	NA	both_sexes	0.160541	0.154497
ENSG00000075218	GTSE1	NO	NA	NA	NA	NA	NA	NA	both_sexes	0.868812	0.818126
ENSG00000075223	SEMA3C	YES	0	0	1	0	0	1	both_sexes	0.116139	0.466531
ENSG00000075234	TTC38	NO	NA	NA	NA	NA	NA	NA	both_sexes	0.659973	0.663545
ENSG00000075239	ACAT1	NO	NA	NA	NA	NA	NA	NA	both_sexes	0.257599	0.218636
ENSG00000075240	GRAMD4	NO	NA	NA	NA	NA	NA	NA	both_sexes	0.458898	0.449661
ENSG00000075275	CELSR1	NO	NA	NA	NA	NA	NA	NA	both_sexes	0.229402	0.134704
ENSG00000075290	WNT8B	NO	NA	NA	NA	NA	NA	NA	both_sexes	0.765556	0.717732
ENSG00000075292	ZNF638	YES	1	0	0	0	0	1	both_sexes	0.530355	0.499879
ENSG00000075303	SLC25A40	NO	NA	NA	NA	NA	NA	NA	both_sexes	0.54605	0.460222
ENSG00000075336	TIMM21	NO	NA	NA	NA	NA	NA	NA	both_sexes	0.948262	0.938226
ENSG00000075340	ADD2	NO	NA	NA	NA	NA	NA	NA	both_sexes	0.802618	0.725253
ENSG00000075388	FGF4	YES	0	0	0	0	0	0	both_sexes	0.185461	0.110855
ENSG00000075391	RASAL2	NO	NA	NA	NA	NA	NA	NA	both_sexes	0.180255	0.198791
ENSG00000075399	VPS9D1	NO	NA	NA	NA	NA	NA	NA	both_sexes	0.262055	0.274242
ENSG00000075407	ZNF37A	NO	NA	NA	NA	NA	NA	NA	both_sexes	0.82963	0.787096
ENSG00000075413	MARK3	NO	NA	NA	NA	NA	NA	NA	both_sexes	0.23985	0.200296
ENSG00000075415	SLC25A3	NO	NA	NA	NA	NA	NA	NA	both_sexes	0.762355	0.777258
ENSG00000075420	FNDC3B	YES	1	0	0	0	0	1	both_sexes	0.242336	0.236863
ENSG00000075426	FOSL2	NO	NA	NA	NA	NA	NA	NA	both_sexes	0.287876	0.316764
ENSG00000075429	CACNG5	NO	NA	NA	NA	NA	NA	NA	both_sexes	0.714696	0.772668
ENSG00000075461	CACNG4	NO	NA	NA	NA	NA	NA	NA	both_sexes	0.795276	0.78185
ENSG00000075539	FRYL	NO	NA	NA	NA	NA	NA	NA	both_sexes	0.940747	0.242369
ENSG00000075568	TMEM131	NO	NA	NA	NA	NA	NA	NA	both_sexes	0.0106165	0.00738526
ENSG00000075618	FSCN1	NO	NA	NA	NA	NA	NA	NA	both_sexes	0.986667	0.932989
ENSG00000075624	ACTB	NO	NA	NA	NA	NA	NA	NA	both_sexes	0.635457	0.731268
ENSG00000075643	MOCOS	NO	NA	NA	NA	NA	NA	NA	both_sexes	0.830783	0.85694
ENSG00000075651	PLD1	NO	NA	NA	NA	NA	NA	NA	both_sexes	0.359492	0.523302
ENSG00000075673	ATP12A	NO	NA	NA	NA	NA	NA	NA	both_sexes	0.65311	0.75254
ENSG00000075702	WDR62	YES	1	0	1	0	0	2	both_sexes	0.776733	0.771857
ENSG00000075711	DLG1	YES	0	0	0	1	0	1	both_sexes	0.97606	0.972394
ENSG00000075785	RAB7A	NO	NA	NA	NA	NA	NA	NA	both_sexes	0.497157	0.446714
ENSG00000075790	BCAP29	YES	1	0	0	0	0	1	both_sexes	0.62383	0.585311
ENSG00000075826	SEC31B	NO	NA	NA	NA	NA	NA	NA	both_sexes	0.553563	0.65147
ENSG00000075856	SART3	NO	NA	NA	NA	NA	NA	NA	both_sexes	0.950424	0.937539
ENSG00000075884	ARHGAP15	NO	NA	NA	NA	NA	NA	NA	both_sexes	0.490808	0.462979
ENSG00000075886	TUBA3D	NO	NA	NA	NA	NA	NA	NA	both_sexes	0.943695	0.952209
ENSG00000075891	PAX2	NO	NA	NA	NA	NA	NA	NA	both_sexes	0.882337	0.858969
ENSG00000075914	EXOSC7	NO	NA	NA	NA	NA	NA	NA	both_sexes	0.755258	0.706695
ENSG00000075945	KIFAP3	YES	1	0	0	0	0	1	both_sexes	0.882181	0.913461
ENSG00000075975	MKRN2	YES	1	0	1	1	0	3	both_sexes	0.0428567	0.0549576
ENSG00000076003	MCM6	NO	NA	NA	NA	NA	NA	NA	both_sexes	0.731218	0.375379
ENSG00000076043	REXO2	NO	NA	NA	NA	NA	NA	NA	both_sexes	0.793964	0.816836
ENSG00000076053	RBM7	NO	NA	NA	NA	NA	NA	NA	both_sexes	0.0179147	0.0219631
ENSG00000076067	RBMS2	YES	0	0	0	0	0	0	both_sexes	0.812629	0.857842
ENSG00000076108	BAZ2A	YES	1	0	0	0	0	1	both_sexes	0.034728	0.0373112
ENSG00000076201	PTPN23	NO	NA	NA	NA	NA	NA	NA	both_sexes	0.7983	0.853442
ENSG00000076242	MLH1	NO	NA	NA	NA	NA	NA	NA	both_sexes	0.954351	0.959036
ENSG00000076248	UNG	NO	NA	NA	NA	NA	NA	NA	both_sexes	0.825333	0.861302
ENSG00000076258	FMO4	NO	NA	NA	NA	NA	NA	NA	both_sexes	0.74098	0.683259
ENSG00000076321	KLHL20	NO	NA	NA	NA	NA	NA	NA	both_sexes	0.0850369	0.117143
ENSG00000076344	RGS11	YES	0	0	0	0	0	0	both_sexes	0.812343	0.811418
ENSG00000076351	SLC46A1	NO	NA	NA	NA	NA	NA	NA	both_sexes	0.956984	0.941393
ENSG00000076356	PLXNA2	NO	NA	NA	NA	NA	NA	NA	both_sexes	0.691157	0.719823
ENSG00000076382	SPAG5	NO	NA	NA	NA	NA	NA	NA	both_sexes	0.425278	0.365694
ENSG00000076513	ANKRD13A	YES	1	0	0	0	0	1	both_sexes	0.449152	0.54393
ENSG00000076554	TPD52	NO	NA	NA	NA	NA	NA	NA	both_sexes	0.799308	0.812269
ENSG00000076555	ACACB	NO	NA	NA	NA	NA	NA	NA	both_sexes	0.822166	0.196869
ENSG00000076604	TRAF4	NO	NA	NA	NA	NA	NA	NA	both_sexes	0.399532	0.39838
ENSG00000076641	PAG1	NO	NA	NA	NA	NA	NA	NA	both_sexes	0.188453	0.14978
ENSG00000076650	GPATCH1	NO	NA	NA	NA	NA	NA	NA	both_sexes	0.608604	0.468934
ENSG00000076662	ICAM3	NO	NA	NA	NA	NA	NA	NA	both_sexes	0.650411	0.691655
ENSG00000076685	NT5C2	YES	1	0	0	0	0	1	both_sexes	0.0273744	0.0235587
ENSG00000076706	MCAM	NO	NA	NA	NA	NA	NA	NA	both_sexes	0.698641	0.698203
ENSG00000076826	CAMSAP3	NO	NA	NA	NA	NA	NA	NA	both_sexes	0.0813538	0.0778997
ENSG00000076864	RAP1GAP	YES	0	0	0	0	0	0	both_sexes	0.736136	0.716717
ENSG00000076924	XAB2	NO	NA	NA	NA	NA	NA	NA	both_sexes	0.896646	0.932756
ENSG00000076928	ARHGEF1	NO	NA	NA	NA	NA	NA	NA	both_sexes	0.882253	0.910312
ENSG00000076944	STXBP2	NO	NA	NA	NA	NA	NA	NA	both_sexes	0.957502	0.969797
ENSG00000076984	MAP2K7	NO	NA	NA	NA	NA	NA	NA	both_sexes	0.00598404	0.00385088
ENSG00000077009	NMRK2	NO	NA	NA	NA	NA	NA	NA	both_sexes	0.00129718	0.00181045
ENSG00000077044	DGKD	NO	NA	NA	NA	NA	NA	NA	both_sexes	0.502718	0.563715
ENSG00000077063	CTTNBP2	NO	NA	NA	NA	NA	NA	NA	both_sexes	0.301295	0.214029
ENSG00000077080	ACTL6B	NO	NA	NA	NA	NA	NA	NA	both_sexes	0.482818	0.497199
ENSG00000077092	RARB	YES	0	0	0	1	0	1	both_sexes	0.711082	0.705987
ENSG00000077097	TOP2B	YES	0	0	0	0	0	0	both_sexes	0.60837	0.644231
ENSG00000077147	TM9SF3	NO	NA	NA	NA	NA	NA	NA	both_sexes	0.330723	0.286387
ENSG00000077150	NFKB2	YES	0	0	0	0	0	0	both_sexes	0.80351	0.817322
ENSG00000077152	UBE2T	NO	NA	NA	NA	NA	NA	NA	both_sexes	0.0338472	0.0449161
ENSG00000077157	PPP1R12B	NO	NA	NA	NA	NA	NA	NA	both_sexes	0.0799743	0.0594181
ENSG00000077232	DNAJC10	NO	NA	NA	NA	NA	NA	NA	both_sexes	0.262597	0.274246
ENSG00000077235	GTF3C1	NO	NA	NA	NA	NA	NA	NA	both_sexes	0.0735193	0.0618236
ENSG00000077238	IL4R	NO	NA	NA	NA	NA	NA	NA	both_sexes	0.435363	0.569445
ENSG00000077254	USP33	NO	NA	NA	NA	NA	NA	NA	both_sexes	0.404543	0.29321
ENSG00000077312	SNRPA	NO	NA	NA	NA	NA	NA	NA	both_sexes	0.824652	0.659822
ENSG00000077327	SPAG6	YES	0	0	0	0	0	0	both_sexes	0.550629	0.518163
ENSG00000077348	EXOSC5	NO	NA	NA	NA	NA	NA	NA	both_sexes	0.935173	0.9115
ENSG00000077380	DYNC1I2	NO	NA	NA	NA	NA	NA	NA	both_sexes	0.822239	0.821896
ENSG00000077420	APBB1IP	NO	NA	NA	NA	NA	NA	NA	both_sexes	0.305711	0.304375
ENSG00000077454	LRCH4	NO	NA	NA	NA	NA	NA	NA	both_sexes	0.285151	0.372843
ENSG00000077458	FAM76B	YES	0	0	0	0	0	0	both_sexes	0.539051	0.705908
ENSG00000077463	SIRT6	NO	NA	NA	NA	NA	NA	NA	both_sexes	0.672812	0.628981
ENSG00000077498	TYR	NO	NA	NA	NA	NA	NA	NA	both_sexes	0.559551	0.434479
ENSG00000077514	POLD3	NO	NA	NA	NA	NA	NA	NA	both_sexes	0.0105578	0.00709396
ENSG00000077522	ACTN2	NO	NA	NA	NA	NA	NA	NA	both_sexes	0.12682	0.10845
ENSG00000077549	CAPZB	YES	1	0	0	0	0	1	both_sexes	0.651746	0.691751
ENSG00000077585	GPR137B	NO	NA	NA	NA	NA	NA	NA	both_sexes	0.0295902	0.0389304
ENSG00000077616	NAALAD2	NO	NA	NA	NA	NA	NA	NA	both_sexes	0.749382	0.800398
ENSG00000077684	JADE1	NO	NA	NA	NA	NA	NA	NA	both_sexes	0.350108	0.360759
ENSG00000077782	FGFR1	NO	NA	NA	NA	NA	NA	NA	both_sexes	0.572957	0.58588
ENSG00000077800	FKBP6	NO	NA	NA	NA	NA	NA	NA	both_sexes	0.0772336	0.1046
ENSG00000077935	SMC1B	NO	NA	NA	NA	NA	NA	NA	both_sexes	0.935072	0.918922
ENSG00000077942	FBLN1	NO	NA	NA	NA	NA	NA	NA	both_sexes	0.275225	0.295669
ENSG00000077943	ITGA8	NO	NA	NA	NA	NA	NA	NA	both_sexes	0.163722	0.209961
ENSG00000077984	CST7	NO	NA	NA	NA	NA	NA	NA	both_sexes	0.107304	0.224044
ENSG00000078018	MAP2	NO	NA	NA	NA	NA	NA	NA	both_sexes	0.148357	0.212218
ENSG00000078043	PIAS2	NO	NA	NA	NA	NA	NA	NA	both_sexes	0.0402341	0.0324736
ENSG00000078053	AMPH	NO	NA	NA	NA	NA	NA	NA	both_sexes	0.0338435	0.0434651
ENSG00000078070	MCCC1	NO	NA	NA	NA	NA	NA	NA	both_sexes	0.428549	0.341081
ENSG00000078081	LAMP3	NO	NA	NA	NA	NA	NA	NA	both_sexes	0.125596	0.188823
ENSG00000078098	FAP	NO	NA	NA	NA	NA	NA	NA	both_sexes	0.0809266	0.0654439
ENSG00000078114	NEBL	YES	1	0	0	1	1	3	both_sexes	0.000138474	0.0552977
ENSG00000078124	ACER3	NO	NA	NA	NA	NA	NA	NA	both_sexes	0.0532152	0.0546401
ENSG00000078140	UBE2K	NO	NA	NA	NA	NA	NA	NA	both_sexes	0.67971	0.67971
ENSG00000078142	PIK3C3	NO	NA	NA	NA	NA	NA	NA	both_sexes	0.0406646	0.0582282
ENSG00000078177	N4BP2	NO	NA	NA	NA	NA	NA	NA	both_sexes	0.598876	0.616687
ENSG00000078237	TIGAR	YES	0	0	0	0	0	0	both_sexes	0.801805	0.786121
ENSG00000078246	TULP3	NO	NA	NA	NA	NA	NA	NA	both_sexes	0.357768	0.306947
ENSG00000078269	SYNJ2	NO	NA	NA	NA	NA	NA	NA	both_sexes	0.00116014	0.89031
ENSG00000078295	ADCY2	NO	NA	NA	NA	NA	NA	NA	both_sexes	0.487727	0.479049
ENSG00000078304	PPP2R5C	NO	NA	NA	NA	NA	NA	NA	both_sexes	0.632238	0.58499
ENSG00000078328	RBFOX1	NO	NA	NA	NA	NA	NA	NA	both_sexes	0.0957553	0.103674
ENSG00000078369	GNB1	NO	NA	NA	NA	NA	NA	NA	both_sexes	0.0321584	0.0399575
ENSG00000078399	HOXA9	YES	0	0	0	0	0	0	both_sexes	0.19491	0.254221
ENSG00000078401	EDN1	NO	NA	NA	NA	NA	NA	NA	both_sexes	0.173961	0.19204
ENSG00000078403	MLLT10	NO	NA	NA	NA	NA	NA	NA	both_sexes	0.106686	0.101564
ENSG00000078487	ZCWPW1	NO	NA	NA	NA	NA	NA	NA	both_sexes	0.349129	0.357641
ENSG00000078549	ADCYAP1R1	NO	NA	NA	NA	NA	NA	NA	both_sexes	0.819327	0.870287
ENSG00000078579	FGF20	NO	NA	NA	NA	NA	NA	NA	both_sexes	0.697873	0.761387
ENSG00000078618	NRDC	YES	0	0	0	0	0	0	both_sexes	0.747471	0.783349
ENSG00000078668	VDAC3	NO	NA	NA	NA	NA	NA	NA	both_sexes	0.652527	0.62648
ENSG00000078674	PCM1	YES	1	0	1	0	0	2	both_sexes	0.160239	0.0974316
ENSG00000078687	TNRC6C	NO	NA	NA	NA	NA	NA	NA	both_sexes	0.869205	0.888347
ENSG00000078699	CBFA2T2	NO	NA	NA	NA	NA	NA	NA	both_sexes	0.930801	0.90836
ENSG00000078725	BRINP1	NO	NA	NA	NA	NA	NA	NA	both_sexes	0.159506	0.169092
ENSG00000078747	ITCH	NO	NA	NA	NA	NA	NA	NA	both_sexes	0.0224207	0.0259031
ENSG00000078795	PKD2L2	YES	1	0	0	0	0	1	both_sexes	0.0827731	0.100858
ENSG00000078804	TP53INP2	NO	NA	NA	NA	NA	NA	NA	both_sexes	0.699805	0.78569
ENSG00000078808	SDF4	YES	0	0	0	0	0	0	both_sexes	0.0651423	0.0767579
ENSG00000078814	MYH7B	NO	NA	NA	NA	NA	NA	NA	both_sexes	0.154539	0.0717818
ENSG00000078898	BPIFB2	NO	NA	NA	NA	NA	NA	NA	both_sexes	0.711525	0.626521
ENSG00000078900	TP73	NO	NA	NA	NA	NA	NA	NA	both_sexes	0.845054	0.868351
ENSG00000078902	TOLLIP	NO	NA	NA	NA	NA	NA	NA	both_sexes	0.018965	0.0227688
ENSG00000078967	UBE2D4	NO	NA	NA	NA	NA	NA	NA	both_sexes	0.772789	0.843286
ENSG00000079101	CLUL1	NO	NA	NA	NA	NA	NA	NA	both_sexes	0.841696	0.795102
ENSG00000079102	RUNX1T1	NO	NA	NA	NA	NA	NA	NA	both_sexes	0.223472	0.288458
ENSG00000079112	CDH17	NO	NA	NA	NA	NA	NA	NA	both_sexes	0.551122	0.727463
ENSG00000079134	THOC1	NO	NA	NA	NA	NA	NA	NA	both_sexes	0.989258	0.993637
ENSG00000079150	FKBP7	YES	1	0	1	0	0	2	both_sexes	0.241992	0.215169
ENSG00000079156	OSBPL6	YES	0	0	0	1	0	1	both_sexes	0.498876	0.553271
ENSG00000079215	SLC1A3	NO	NA	NA	NA	NA	NA	NA	both_sexes	0.90191	0.879523
ENSG00000079246	XRCC5	NO	NA	NA	NA	NA	NA	NA	both_sexes	0.28634	0.286488
ENSG00000079257	LXN	NO	NA	NA	NA	NA	NA	NA	both_sexes	0.915906	0.885271
ENSG00000079263	SP140	NO	NA	NA	NA	NA	NA	NA	both_sexes	0.515917	0.664249
ENSG00000079277	MKNK1	NO	NA	NA	NA	NA	NA	NA	both_sexes	0.405962	0.493198
ENSG00000079308	TNS1	NO	NA	NA	NA	NA	NA	NA	both_sexes	0.150667	0.123015
ENSG00000079313	REXO1	YES	0	0	0	0	0	0	both_sexes	0.442121	0.484222
ENSG00000079332	SAR1A	NO	NA	NA	NA	NA	NA	NA	both_sexes	0.615729	0.685036
ENSG00000079335	CDC14A	NO	NA	NA	NA	NA	NA	NA	both_sexes	0.0785246	0.0721955
ENSG00000079337	RAPGEF3	NO	NA	NA	NA	NA	NA	NA	both_sexes	0.732384	0.779656
ENSG00000079385	CEACAM1	NO	NA	NA	NA	NA	NA	NA	both_sexes	0.900214	0.93243
ENSG00000079387	SENP1	NO	NA	NA	NA	NA	NA	NA	both_sexes	0.00275069	0.002921
ENSG00000079393	DUSP13B	NO	NA	NA	NA	NA	NA	NA	both_sexes	0.482534	0.370489
ENSG00000079432	CIC	NO	NA	NA	NA	NA	NA	NA	both_sexes	0.749234	0.751746
ENSG00000079435	LIPE	NO	NA	NA	NA	NA	NA	NA	both_sexes	0.779932	0.766494
ENSG00000079459	FDFT1	YES	0	0	1	0	0	1	both_sexes	0.610732	0.154702
ENSG00000079462	PAFAH1B3	NO	NA	NA	NA	NA	NA	NA	both_sexes	0.110016	0.131961
ENSG00000079557	AFM	NO	NA	NA	NA	NA	NA	NA	both_sexes	0.840869	0.834404
ENSG00000079616	KIF22	YES	0	0	0	0	0	0	both_sexes	0.677499	0.313049
ENSG00000079689	SCGN	NO	NA	NA	NA	NA	NA	NA	both_sexes	0.0461887	0.0571053
ENSG00000079691	CARMIL1	NO	NA	NA	NA	NA	NA	NA	both_sexes	0.115093	0.122187
ENSG00000079739	PGM1	NO	NA	NA	NA	NA	NA	NA	both_sexes	0.953954	0.947798
ENSG00000079785	DDX1	NO	NA	NA	NA	NA	NA	NA	both_sexes	0.128423	0.121294
ENSG00000079805	DNM2	NO	NA	NA	NA	NA	NA	NA	both_sexes	0.0309985	0.0229481
ENSG00000079819	EPB41L2	NO	NA	NA	NA	NA	NA	NA	both_sexes	0.959778	0.972961
ENSG00000079841	RIMS1	NO	NA	NA	NA	NA	NA	NA	both_sexes	0.997716	0.996933
ENSG00000079931	MOXD1	NO	NA	NA	NA	NA	NA	NA	both_sexes	0.917935	0.943242
ENSG00000079950	STX7	NO	NA	NA	NA	NA	NA	NA	both_sexes	0.129859	0.14082
ENSG00000079974	RABL2B	NO	NA	NA	NA	NA	NA	NA	both_sexes	0.26701	0.23622
ENSG00000079999	KEAP1	NO	NA	NA	NA	NA	NA	NA	both_sexes	0.0720636	0.0432463
ENSG00000080007	DDX43	NO	NA	NA	NA	NA	NA	NA	both_sexes	0.255909	0.204116
ENSG00000080031	PTPRH	NO	NA	NA	NA	NA	NA	NA	both_sexes	0.496628	0.566242
ENSG00000080166	DCT	NO	NA	NA	NA	NA	NA	NA	both_sexes	0.526241	0.261341
ENSG00000080189	SLC35C2	YES	0	0	0	0	0	0	both_sexes	0.942211	0.923204
ENSG00000080200	CRYBG3	NO	NA	NA	NA	NA	NA	NA	both_sexes	0.929396	0.955783
ENSG00000080224	EPHA6	NO	NA	NA	NA	NA	NA	NA	both_sexes	0.424887	0.674533
ENSG00000080293	SCTR	NO	NA	NA	NA	NA	NA	NA	both_sexes	0.164914	0.676534
ENSG00000080298	RFX3	NO	NA	NA	NA	NA	NA	NA	both_sexes	0.969281	0.978771
ENSG00000080345	RIF1	NO	NA	NA	NA	NA	NA	NA	both_sexes	0.875144	0.84793
ENSG00000080371	RAB21	NO	NA	NA	NA	NA	NA	NA	both_sexes	0.0456606	0.0317555
ENSG00000080493	SLC4A4	YES	1	0	0	1	0	2	both_sexes	0.447771	0.607459
ENSG00000080503	SMARCA2	NO	NA	NA	NA	NA	NA	NA	both_sexes	0.217464	0.124883
ENSG00000080511	RDH8	NO	NA	NA	NA	NA	NA	NA	both_sexes	0.0469989	0.0321
ENSG00000080546	SESN1	NO	NA	NA	NA	NA	NA	NA	both_sexes	0.693637	0.754455
ENSG00000080573	COL5A3	NO	NA	NA	NA	NA	NA	NA	both_sexes	0.515103	0.597998
ENSG00000080603	SRCAP	NO	NA	NA	NA	NA	NA	NA	both_sexes	0.128637	0.0795588
ENSG00000080608	PUM3	NO	NA	NA	NA	NA	NA	NA	both_sexes	0.257923	0.195247
ENSG00000080618	CPB2	NO	NA	NA	NA	NA	NA	NA	both_sexes	0.678054	0.687858
ENSG00000080644	CHRNA3	NO	NA	NA	NA	NA	NA	NA	both_sexes	0.493664	0.220871
ENSG00000080709	KCNN2	YES	1	0	0	1	0	2	both_sexes	0.701856	0.700129
ENSG00000080802	CNOT4	NO	NA	NA	NA	NA	NA	NA	both_sexes	0.431035	0.349778
ENSG00000080815	PSEN1	YES	0	0	0	0	0	0	both_sexes	0.638328	0.52224
ENSG00000080819	CPOX	NO	NA	NA	NA	NA	NA	NA	both_sexes	0.358319	0.275474
ENSG00000080822	CLDND1	NO	NA	NA	NA	NA	NA	NA	both_sexes	0.420704	0.333199
ENSG00000080823	MOK	NO	NA	NA	NA	NA	NA	NA	both_sexes	0.474392	0.567909
ENSG00000080824	HSP90AA1	NO	NA	NA	NA	NA	NA	NA	both_sexes	0.831111	0.781645
ENSG00000080839	RBL1	NO	NA	NA	NA	NA	NA	NA	both_sexes	0.927191	0.734677
ENSG00000080845	DLGAP4	NO	NA	NA	NA	NA	NA	NA	both_sexes	0.684831	0.563545
ENSG00000080854	IGSF9B	NO	NA	NA	NA	NA	NA	NA	both_sexes	0.0852911	0.115307
ENSG00000080910	CFHR2	NO	NA	NA	NA	NA	NA	NA	both_sexes	0.133605	0.118849
ENSG00000080986	NDC80	YES	0	0	0	0	0	0	both_sexes	0.229739	0.160631
ENSG00000081014	AP4E1	NO	NA	NA	NA	NA	NA	NA	both_sexes	0.822149	0.888454
ENSG00000081019	RSBN1	NO	NA	NA	NA	NA	NA	NA	both_sexes	0.0143864	0.0188802
ENSG00000081026	MAGI3	NO	NA	NA	NA	NA	NA	NA	both_sexes	0.780918	0.702434
ENSG00000081041	CXCL2	NO	NA	NA	NA	NA	NA	NA	both_sexes	0.335617	0.36447
ENSG00000081051	AFP	NO	NA	NA	NA	NA	NA	NA	both_sexes	0.218184	0.185724
ENSG00000081052	COL4A4	NO	NA	NA	NA	NA	NA	NA	both_sexes	0.486264	0.501158
ENSG00000081059	TCF7	NO	NA	NA	NA	NA	NA	NA	both_sexes	0.0847047	0.0809962
ENSG00000081087	OSTM1	NO	NA	NA	NA	NA	NA	NA	both_sexes	0.705056	0.634013
ENSG00000081138	CDH7	NO	NA	NA	NA	NA	NA	NA	both_sexes	0.779623	0.798608
ENSG00000081148	IMPG2	NO	NA	NA	NA	NA	NA	NA	both_sexes	0.280091	0.319188
ENSG00000081154	PCNP	NO	NA	NA	NA	NA	NA	NA	both_sexes	0.856902	0.839587
ENSG00000081177	EXD2	NO	NA	NA	NA	NA	NA	NA	both_sexes	0.785754	0.872171
ENSG00000081181	ARG2	NO	NA	NA	NA	NA	NA	NA	both_sexes	0.912554	0.911516
ENSG00000081189	MEF2C	YES	0	1	0	0	0	1	both_sexes	0.0247916	0.0252163
ENSG00000081237	PTPRC	NO	NA	NA	NA	NA	NA	NA	both_sexes	0.752425	0.773668
ENSG00000081248	CACNA1S	NO	NA	NA	NA	NA	NA	NA	both_sexes	0.848277	0.908734
ENSG00000081277	PKP1	NO	NA	NA	NA	NA	NA	NA	both_sexes	0.802641	0.805056
ENSG00000081307	UBA5	NO	NA	NA	NA	NA	NA	NA	both_sexes	0.188821	0.180298
ENSG00000081320	STK17B	NO	NA	NA	NA	NA	NA	NA	both_sexes	0.087345	0.0813323
ENSG00000081377	CDC14B	YES	0	0	0	0	0	0	both_sexes	0.998458	0.998971
ENSG00000081386	ZNF510	YES	0	0	0	0	0	0	both_sexes	0.689855	0.693329
ENSG00000081479	LRP2	NO	NA	NA	NA	NA	NA	NA	both_sexes	0.631184	0.534752
ENSG00000081665	ZNF506	NO	NA	NA	NA	NA	NA	NA	both_sexes	0.334056	0.254784
ENSG00000081692	JMJD4	YES	0	0	0	0	0	0	both_sexes	0.133005	0.160773
ENSG00000081721	DUSP12	NO	NA	NA	NA	NA	NA	NA	both_sexes	0.46391	0.323544
ENSG00000081760	AACS	NO	NA	NA	NA	NA	NA	NA	both_sexes	0.924411	0.86761
ENSG00000081791	DELE1	NO	NA	NA	NA	NA	NA	NA	both_sexes	0.803466	0.782453
ENSG00000081800	SLC13A1	NO	NA	NA	NA	NA	NA	NA	both_sexes	0.766577	0.788339
ENSG00000081803	CADPS2	NO	NA	NA	NA	NA	NA	NA	both_sexes	0.0424408	0.0343756
ENSG00000081818	PCDHB4	YES	0	0	0	0	0	0	both_sexes	0.217051	0.285066
ENSG00000081842	PCDHA6	YES	0	0	0	0	0	0	both_sexes	0.441912	0.38029
ENSG00000081853	PCDHGA2	YES	0	0	0	0	0	0	both_sexes	0.598915	0.603972
ENSG00000081870	IFT25	NO	NA	NA	NA	NA	NA	NA	both_sexes	0.989552	0.986244
ENSG00000081913	PHLPP1	NO	NA	NA	NA	NA	NA	NA	both_sexes	0.0284011	0.224372
ENSG00000081923	ATP8B1	NO	NA	NA	NA	NA	NA	NA	both_sexes	0.683034	0.695017
ENSG00000081985	IL12RB2	NO	NA	NA	NA	NA	NA	NA	both_sexes	0.0854014	0.0898955
ENSG00000082014	SMARCD3	YES	0	1	0	0	0	1	both_sexes	0.543057	0.73357
ENSG00000082068	WDR70	NO	NA	NA	NA	NA	NA	NA	both_sexes	0.565957	0.528986
ENSG00000082074	FYB1	NO	NA	NA	NA	NA	NA	NA	both_sexes	0.574055	0.545827
ENSG00000082126	MPP4	NO	NA	NA	NA	NA	NA	NA	both_sexes	0.0599818	0.17782
ENSG00000082146	STRADB	NO	NA	NA	NA	NA	NA	NA	both_sexes	0.876859	0.905059
ENSG00000082153	BZW1	YES	0	0	0	0	0	0	both_sexes	0.81603	0.794534
ENSG00000082175	PGR	NO	NA	NA	NA	NA	NA	NA	both_sexes	0.710715	0.799705
ENSG00000082196	C1QTNF3	NO	NA	NA	NA	NA	NA	NA	both_sexes	0.36513	0.642714
ENSG00000082212	ME2	NO	NA	NA	NA	NA	NA	NA	both_sexes	0.917961	0.894152
ENSG00000082213	C5orf22	NO	NA	NA	NA	NA	NA	NA	both_sexes	0.996182	0.997645
ENSG00000082258	CCNT2	NO	NA	NA	NA	NA	NA	NA	both_sexes	0.665805	0.609434
ENSG00000082269	FAM135A	NO	NA	NA	NA	NA	NA	NA	both_sexes	0.874759	0.888624
ENSG00000082293	COL19A1	NO	NA	NA	NA	NA	NA	NA	both_sexes	0.989397	0.992894
ENSG00000082397	EPB41L3	NO	NA	NA	NA	NA	NA	NA	both_sexes	0.286032	0.249217
ENSG00000082438	COBLL1	NO	NA	NA	NA	NA	NA	NA	both_sexes	0.533199	0.576903
ENSG00000082482	KCNK2	NO	NA	NA	NA	NA	NA	NA	both_sexes	0.769272	0.733299
ENSG00000082497	SERTAD4	NO	NA	NA	NA	NA	NA	NA	both_sexes	0.819174	0.435319
ENSG00000082512	TRAF5	NO	NA	NA	NA	NA	NA	NA	both_sexes	0.380054	0.35517
ENSG00000082515	MRPL22	NO	NA	NA	NA	NA	NA	NA	both_sexes	0.669202	0.632053
ENSG00000082516	GEMIN5	NO	NA	NA	NA	NA	NA	NA	both_sexes	0.634474	0.551962
ENSG00000082556	OPRK1	NO	NA	NA	NA	NA	NA	NA	both_sexes	0.245765	0.221846
ENSG00000082641	NFE2L1	NO	NA	NA	NA	NA	NA	NA	both_sexes	0.605222	0.691726
ENSG00000082684	SEMA5B	YES	0	0	0	0	0	0	both_sexes	0.375425	0.365688
ENSG00000082701	GSK3B	NO	NA	NA	NA	NA	NA	NA	both_sexes	0.0283702	0.0276441
ENSG00000082781	ITGB5	NO	NA	NA	NA	NA	NA	NA	both_sexes	0.163733	0.263741
ENSG00000082805	ERC1	NO	NA	NA	NA	NA	NA	NA	both_sexes	0.073106	0.0675203
ENSG00000082898	XPO1	YES	1	0	0	0	0	1	both_sexes	0.00810823	0.00844757
ENSG00000082996	RNF13	NO	NA	NA	NA	NA	NA	NA	both_sexes	0.63451	0.52442
ENSG00000083067	TRPM3	NO	NA	NA	NA	NA	NA	NA	both_sexes	0.0528834	0.0360057
ENSG00000083093	PALB2	NO	NA	NA	NA	NA	NA	NA	both_sexes	0.873132	0.858852
ENSG00000083097	DOP1A	NO	NA	NA	NA	NA	NA	NA	both_sexes	0.227978	0.164165
ENSG00000083099	LYRM2	NO	NA	NA	NA	NA	NA	NA	both_sexes	0.317612	0.340297
ENSG00000083123	BCKDHB	NO	NA	NA	NA	NA	NA	NA	both_sexes	0.52918	0.587912
ENSG00000083168	KAT6A	NO	NA	NA	NA	NA	NA	NA	both_sexes	0.848203	0.496247
ENSG00000083223	TUT7	NO	NA	NA	NA	NA	NA	NA	both_sexes	0.901583	0.909922
ENSG00000083290	ULK2	NO	NA	NA	NA	NA	NA	NA	both_sexes	0.858191	0.904131
ENSG00000083307	GRHL2	NO	NA	NA	NA	NA	NA	NA	both_sexes	0.369784	0.362492
ENSG00000083312	TNPO1	YES	0	0	0	0	0	0	both_sexes	0.770186	0.779642
ENSG00000083444	PLOD1	YES	0	0	0	0	0	0	both_sexes	0.405444	0.443188
ENSG00000083454	P2RX5	YES	0	0	0	0	0	0	both_sexes	0.00791592	0.00529209
ENSG00000083457	ITGAE	YES	0	0	0	0	0	0	both_sexes	0.0207001	0.0390517
ENSG00000083520	DIS3	NO	NA	NA	NA	NA	NA	NA	both_sexes	0.932167	0.949795
ENSG00000083535	PIBF1	NO	NA	NA	NA	NA	NA	NA	both_sexes	0.124001	0.103301
ENSG00000083544	TDRD3	NO	NA	NA	NA	NA	NA	NA	both_sexes	0.0405924	0.0507268
ENSG00000083635	NUFIP1	NO	NA	NA	NA	NA	NA	NA	both_sexes	0.75163	0.749897
ENSG00000083642	PDS5B	NO	NA	NA	NA	NA	NA	NA	both_sexes	0.0699031	0.0642256
ENSG00000083720	OXCT1	NO	NA	NA	NA	NA	NA	NA	both_sexes	0.0239	0.0172782
ENSG00000083782	EPYC	NO	NA	NA	NA	NA	NA	NA	both_sexes	0.343796	0.355502
ENSG00000083799	CYLD	NO	NA	NA	NA	NA	NA	NA	both_sexes	0.507234	0.362818
ENSG00000083807	SLC27A5	NO	NA	NA	NA	NA	NA	NA	both_sexes	0.598509	0.758262
ENSG00000083812	ZNF324	NO	NA	NA	NA	NA	NA	NA	both_sexes	0.974651	0.982962
ENSG00000083814	ZNF671	YES	0	0	0	0	0	0	both_sexes	0.784592	0.842026
ENSG00000083817	ZNF416	YES	0	0	0	0	0	0	both_sexes	0.344045	0.417832
ENSG00000083828	ZNF586	YES	0	0	0	1	0	1	both_sexes	0.682398	0.679532
ENSG00000083838	ZNF446	NO	NA	NA	NA	NA	NA	NA	both_sexes	0.415514	0.573797
ENSG00000083844	ZNF264	YES	0	0	0	0	0	0	both_sexes	0.916198	0.905006
ENSG00000083845	RPS5	NO	NA	NA	NA	NA	NA	NA	both_sexes	0.12194	0.132056
ENSG00000083857	FAT1	NO	NA	NA	NA	NA	NA	NA	both_sexes	0.00878142	0.137225
ENSG00000083896	YTHDC1	NO	NA	NA	NA	NA	NA	NA	both_sexes	0.219891	0.260288
ENSG00000083937	CHMP2B	NO	NA	NA	NA	NA	NA	NA	both_sexes	0.00903581	0.00570235
ENSG00000084070	SMAP2	NO	NA	NA	NA	NA	NA	NA	both_sexes	0.0572348	0.0512395
ENSG00000084072	PPIE	NO	NA	NA	NA	NA	NA	NA	both_sexes	0.180172	0.116378
ENSG00000084073	ZMPSTE24	NO	NA	NA	NA	NA	NA	NA	both_sexes	0.370356	0.467258
ENSG00000084090	STARD7	NO	NA	NA	NA	NA	NA	NA	both_sexes	0.123627	0.127573
ENSG00000084092	NOA1	YES	0	0	0	0	0	0	both_sexes	0.72379	0.558291
ENSG00000084093	REST	YES	1	1	1	0	0	3	both_sexes	0.413685	0.281103
ENSG00000084110	HAL	NO	NA	NA	NA	NA	NA	NA	both_sexes	0.658674	0.622749
ENSG00000084112	SSH1	NO	NA	NA	NA	NA	NA	NA	both_sexes	0.959282	0.971536
ENSG00000084207	GSTP1	YES	0	0	0	0	0	0	both_sexes	0.689139	0.600813
ENSG00000084234	APLP2	NO	NA	NA	NA	NA	NA	NA	both_sexes	0.645127	0.497846
ENSG00000084444	FAM234B	YES	0	0	0	0	0	0	both_sexes	0.0238944	0.0315978
ENSG00000084453	SLCO1A2	NO	NA	NA	NA	NA	NA	NA	both_sexes	0.908646	0.831659
ENSG00000084463	WBP11	NO	NA	NA	NA	NA	NA	NA	both_sexes	0.585139	0.619759
ENSG00000084623	EIF3I	NO	NA	NA	NA	NA	NA	NA	both_sexes	0.749976	0.691985
ENSG00000084628	NKAIN1	NO	NA	NA	NA	NA	NA	NA	both_sexes	0.868841	0.862254
ENSG00000084636	COL16A1	NO	NA	NA	NA	NA	NA	NA	both_sexes	0.945771	0.789525
ENSG00000084652	TXLNA	NO	NA	NA	NA	NA	NA	NA	both_sexes	0.0815846	0.0747426
ENSG00000084674	APOB	NO	NA	NA	NA	NA	NA	NA	both_sexes	0.0053572	0.00693729
ENSG00000084676	NCOA1	NO	NA	NA	NA	NA	NA	NA	both_sexes	0.995282	0.993368
ENSG00000084693	AGBL5	NO	NA	NA	NA	NA	NA	NA	both_sexes	0.955493	0.968194
ENSG00000084710	EFR3B	YES	0	0	0	0	0	0	both_sexes	0.380669	0.297615
ENSG00000084731	KIF3C	YES	1	0	0	0	0	1	both_sexes	0.291984	0.318454
ENSG00000084733	RAB10	YES	0	0	0	0	0	0	both_sexes	0.220086	0.192918
ENSG00000084734	GCKR	NO	NA	NA	NA	NA	NA	NA	both_sexes	0.938699	0.878298
ENSG00000084754	HADHA	YES	0	0	0	1	0	1	both_sexes	0.0397822	0.187491
ENSG00000084764	MAPRE3	NO	NA	NA	NA	NA	NA	NA	both_sexes	0.818355	0.794943
ENSG00000084774	CAD	NO	NA	NA	NA	NA	NA	NA	both_sexes	0.141837	0.142137
ENSG00000085063	CD59	NO	NA	NA	NA	NA	NA	NA	both_sexes	0.756835	0.70845
ENSG00000085117	CD82	NO	NA	NA	NA	NA	NA	NA	both_sexes	0.782713	0.748618
ENSG00000085231	AK6	NO	NA	NA	NA	NA	NA	NA	both_sexes	0.883465	0.860518
ENSG00000085265	FCN1	NO	NA	NA	NA	NA	NA	NA	both_sexes	0.048602	0.0626462
ENSG00000085274	MYNN	NO	NA	NA	NA	NA	NA	NA	both_sexes	0.0230456	0.0242811
ENSG00000085276	MECOM	NO	NA	NA	NA	NA	NA	NA	both_sexes	0.424713	0.262259
ENSG00000085365	SCAMP1	NO	NA	NA	NA	NA	NA	NA	both_sexes	0.792773	0.837445
ENSG00000085377	PREP	YES	0	0	0	0	0	0	both_sexes	0.790106	0.843483
ENSG00000085382	HACE1	YES	0	0	0	0	0	0	both_sexes	0.525794	0.458101
ENSG00000085415	SEH1L	NO	NA	NA	NA	NA	NA	NA	both_sexes	0.920965	0.904038
ENSG00000085433	WDR47	NO	NA	NA	NA	NA	NA	NA	both_sexes	0.802675	0.832416
ENSG00000085449	WDFY1	NO	NA	NA	NA	NA	NA	NA	both_sexes	0.752677	0.75671
ENSG00000085465	OVGP1	YES	0	0	0	0	0	0	both_sexes	0.722085	0.712499
ENSG00000085491	SLC25A24	NO	NA	NA	NA	NA	NA	NA	both_sexes	0.901493	0.86726
ENSG00000085511	MAP3K4	NO	NA	NA	NA	NA	NA	NA	both_sexes	0.0177547	0.0209079
ENSG00000085514	PILRA	NO	NA	NA	NA	NA	NA	NA	both_sexes	0.832748	0.855065
ENSG00000085552	IGSF9	NO	NA	NA	NA	NA	NA	NA	both_sexes	0.907071	0.892536
ENSG00000085563	ABCB1	NO	NA	NA	NA	NA	NA	NA	both_sexes	0.167246	0.184042
ENSG00000085644	ZNF213	NO	NA	NA	NA	NA	NA	NA	both_sexes	0.918863	0.902879
ENSG00000085662	AKR1B1	NO	NA	NA	NA	NA	NA	NA	both_sexes	0.217164	0.28439
ENSG00000085719	CPNE3	NO	NA	NA	NA	NA	NA	NA	both_sexes	0.226061	0.292469
ENSG00000085721	RRN3	NO	NA	NA	NA	NA	NA	NA	both_sexes	0.321194	0.286651
ENSG00000085733	CTTN	NO	NA	NA	NA	NA	NA	NA	both_sexes	0.159076	0.124996
ENSG00000085741	WNT11	NO	NA	NA	NA	NA	NA	NA	both_sexes	0.18723	0.202886
ENSG00000085760	MTIF2	NO	NA	NA	NA	NA	NA	NA	both_sexes	0.823092	0.811707
ENSG00000085788	DDHD2	NO	NA	NA	NA	NA	NA	NA	both_sexes	0.428146	0.593481
ENSG00000085831	TTC39A	YES	1	0	0	1	0	2	both_sexes	0.245602	0.234065
ENSG00000085832	EPS15	YES	1	0	0	0	0	1	both_sexes	0.344206	0.471294
ENSG00000085840	ORC1	YES	0	0	0	0	0	0	both_sexes	0.574223	0.487561
ENSG00000085871	MGST2	NO	NA	NA	NA	NA	NA	NA	both_sexes	0.877946	0.858904
ENSG00000085872	CHERP	NO	NA	NA	NA	NA	NA	NA	both_sexes	0.86382	0.911405
ENSG00000085978	ATG16L1	NO	NA	NA	NA	NA	NA	NA	both_sexes	0.0025639	0.00256948
ENSG00000085982	USP40	NO	NA	NA	NA	NA	NA	NA	both_sexes	0.888474	0.848632
ENSG00000085998	POMGNT1	NO	NA	NA	NA	NA	NA	NA	both_sexes	0.307737	0.336521
ENSG00000085999	RAD54L	NO	NA	NA	NA	NA	NA	NA	both_sexes	0.840189	0.84744
ENSG00000086015	MAST2	NO	NA	NA	NA	NA	NA	NA	both_sexes	0.916425	0.922785
ENSG00000086061	DNAJA1	NO	NA	NA	NA	NA	NA	NA	both_sexes	0.219273	0.283536
ENSG00000086062	B4GALT1	NO	NA	NA	NA	NA	NA	NA	both_sexes	0.361652	0.337786
ENSG00000086065	CHMP5	NO	NA	NA	NA	NA	NA	NA	both_sexes	0.71312	0.735396
ENSG00000086102	NFX1	NO	NA	NA	NA	NA	NA	NA	both_sexes	0.279047	0.233784
ENSG00000086159	AQP6	NO	NA	NA	NA	NA	NA	NA	both_sexes	0.672659	0.690325
ENSG00000086189	DIMT1	NO	NA	NA	NA	NA	NA	NA	both_sexes	0.930431	0.889052
ENSG00000086200	IPO11	NO	NA	NA	NA	NA	NA	NA	both_sexes	0.421393	0.501862
ENSG00000086205	FOLH1	NO	NA	NA	NA	NA	NA	NA	both_sexes	0.532383	0.586831
ENSG00000086232	EIF2AK1	NO	NA	NA	NA	NA	NA	NA	both_sexes	0.644531	0.694232
ENSG00000086288	NME8	NO	NA	NA	NA	NA	NA	NA	both_sexes	0.596152	0.666505
ENSG00000086289	EPDR1	NO	NA	NA	NA	NA	NA	NA	both_sexes	0.870076	0.835883
ENSG00000086300	SNX10	NO	NA	NA	NA	NA	NA	NA	both_sexes	0.405912	0.289004
ENSG00000086475	SEPHS1	NO	NA	NA	NA	NA	NA	NA	both_sexes	0.98604	0.986828
ENSG00000086504	MRPL28	YES	0	0	0	0	0	0	both_sexes	0.808743	0.835824
ENSG00000086506	HBQ1	NO	NA	NA	NA	NA	NA	NA	both_sexes	0.180136	0.159698
ENSG00000086544	ITPKC	NO	NA	NA	NA	NA	NA	NA	both_sexes	0.86059	0.836699
ENSG00000086548	CEACAM6	NO	NA	NA	NA	NA	NA	NA	both_sexes	0.0807139	0.0969905
ENSG00000086570	FAT2	NO	NA	NA	NA	NA	NA	NA	both_sexes	0.362395	0.286971
ENSG00000086589	RBM22	NO	NA	NA	NA	NA	NA	NA	both_sexes	0.486998	0.55575
ENSG00000086598	TMED2	YES	0	0	0	0	0	0	both_sexes	0.859635	0.825724
ENSG00000086619	ERO1B	NO	NA	NA	NA	NA	NA	NA	both_sexes	0.595911	0.628346
ENSG00000086666	ZFAND6	YES	0	0	0	0	0	0	both_sexes	0.342598	0.341843
ENSG00000086696	HSD17B2	NO	NA	NA	NA	NA	NA	NA	both_sexes	0.209113	0.26938
ENSG00000086730	LAT2	YES	0	0	0	0	0	0	both_sexes	0.148598	0.197813
ENSG00000086827	ZW10	YES	0	0	0	0	0	0	both_sexes	0.0573342	0.0663502
ENSG00000086848	ALG9	NO	NA	NA	NA	NA	NA	NA	both_sexes	0.913245	0.930993
ENSG00000086967	MYBPC2	YES	0	0	0	0	0	0	both_sexes	0.023129	0.026507
ENSG00000086991	NOX4	NO	NA	NA	NA	NA	NA	NA	both_sexes	0.0144269	0.0125305
ENSG00000087008	ACOX3	NO	NA	NA	NA	NA	NA	NA	both_sexes	0.808032	0.79222
ENSG00000087053	MTMR2	YES	0	0	0	0	0	0	both_sexes	0.886996	0.907971
ENSG00000087074	PPP1R15A	NO	NA	NA	NA	NA	NA	NA	both_sexes	0.156717	0.117251
ENSG00000087076	HSD17B14	NO	NA	NA	NA	NA	NA	NA	both_sexes	0.316756	0.408964
ENSG00000087077	TRIP6	NO	NA	NA	NA	NA	NA	NA	both_sexes	0.803718	0.819365
ENSG00000087085	ACHE	NO	NA	NA	NA	NA	NA	NA	both_sexes	0.957002	0.948747
ENSG00000087086	FTL	NO	NA	NA	NA	NA	NA	NA	both_sexes	0.78654	0.79389
ENSG00000087087	SRRT	NO	NA	NA	NA	NA	NA	NA	both_sexes	0.024793	0.0152037
ENSG00000087088	BAX	NO	NA	NA	NA	NA	NA	NA	both_sexes	0.995176	0.993525
ENSG00000087095	NLK	NO	NA	NA	NA	NA	NA	NA	both_sexes	0.356901	0.323973
ENSG00000087111	PIGS	NO	NA	NA	NA	NA	NA	NA	both_sexes	0.833324	0.815286
ENSG00000087116	ADAMTS2	NO	NA	NA	NA	NA	NA	NA	both_sexes	0.33491	0.324558
ENSG00000087128	TMPRSS11E	NO	NA	NA	NA	NA	NA	NA	both_sexes	0.736524	0.638782
ENSG00000087152	ATXN7L3	NO	NA	NA	NA	NA	NA	NA	both_sexes	0.604966	0.697894
ENSG00000087157	PGS1	NO	NA	NA	NA	NA	NA	NA	both_sexes	0.05147	0.0546365
ENSG00000087191	PSMC5	NO	NA	NA	NA	NA	NA	NA	both_sexes	0.537025	0.529527
ENSG00000087206	UIMC1	NO	NA	NA	NA	NA	NA	NA	both_sexes	0.90633	0.943898
ENSG00000087237	CETP	NO	NA	NA	NA	NA	NA	NA	both_sexes	0.810111	0.902544
ENSG00000087245	MMP2	NO	NA	NA	NA	NA	NA	NA	both_sexes	0.849331	0.85075
ENSG00000087250	MT3	NO	NA	NA	NA	NA	NA	NA	both_sexes	0.132124	0.413718
ENSG00000087253	LPCAT2	NO	NA	NA	NA	NA	NA	NA	both_sexes	0.948329	0.959179
ENSG00000087258	GNAO1	NO	NA	NA	NA	NA	NA	NA	both_sexes	0.347145	0.377341
ENSG00000087263	OGFOD1	NO	NA	NA	NA	NA	NA	NA	both_sexes	0.643723	0.605303
ENSG00000087266	SH3BP2	NO	NA	NA	NA	NA	NA	NA	both_sexes	0.876659	0.843279
ENSG00000087269	NOP14	NO	NA	NA	NA	NA	NA	NA	both_sexes	0.555503	0.614581
ENSG00000087274	ADD1	NO	NA	NA	NA	NA	NA	NA	both_sexes	0.00984744	0.0615395
ENSG00000087299	L2HGDH	NO	NA	NA	NA	NA	NA	NA	both_sexes	0.954258	0.965181
ENSG00000087301	TXNDC16	NO	NA	NA	NA	NA	NA	NA	both_sexes	0.194621	0.204093
ENSG00000087302	RTRAF	NO	NA	NA	NA	NA	NA	NA	both_sexes	0.568643	0.616587
ENSG00000087303	NID2	NO	NA	NA	NA	NA	NA	NA	both_sexes	0.519141	0.51038
ENSG00000087338	GMCL1	YES	1	0	1	0	0	2	both_sexes	0.291626	0.226331
ENSG00000087365	SF3B2	NO	NA	NA	NA	NA	NA	NA	both_sexes	0.392524	0.472494
ENSG00000087448	KLHL42	NO	NA	NA	NA	NA	NA	NA	both_sexes	0.989314	0.992848
ENSG00000087460	GNAS	NO	NA	NA	NA	NA	NA	NA	both_sexes	0.310872	0.361171
ENSG00000087470	DNM1L	YES	0	0	0	0	0	0	both_sexes	0.808086	0.752791
ENSG00000087494	PTHLH	NO	NA	NA	NA	NA	NA	NA	both_sexes	0.725413	0.605383
ENSG00000087495	PHACTR3	NO	NA	NA	NA	NA	NA	NA	both_sexes	0.95739	0.971121
ENSG00000087502	ERGIC2	NO	NA	NA	NA	NA	NA	NA	both_sexes	0.044843	0.0435115
ENSG00000087510	TFAP2C	NO	NA	NA	NA	NA	NA	NA	both_sexes	0.398332	0.302914
ENSG00000087586	AURKA	NO	NA	NA	NA	NA	NA	NA	both_sexes	0.286083	0.341213
ENSG00000087589	CASS4	NO	NA	NA	NA	NA	NA	NA	both_sexes	0.671949	0.555233
ENSG00000087884	AAMDC	NO	NA	NA	NA	NA	NA	NA	both_sexes	0.891003	0.921386
ENSG00000087903	RFX2	NO	NA	NA	NA	NA	NA	NA	both_sexes	0.124953	0.147516
ENSG00000087995	METTL2A	NO	NA	NA	NA	NA	NA	NA	both_sexes	0.477667	0.381285
ENSG00000088002	SULT2B1	NO	NA	NA	NA	NA	NA	NA	both_sexes	0.184982	0.211166
ENSG00000088035	ALG6	NO	NA	NA	NA	NA	NA	NA	both_sexes	0.860852	0.823106
ENSG00000088038	CNOT3	NO	NA	NA	NA	NA	NA	NA	both_sexes	0.919059	0.900585
ENSG00000088053	GP6	NO	NA	NA	NA	NA	NA	NA	both_sexes	0.919465	0.928515
ENSG00000088179	PTPN4	NO	NA	NA	NA	NA	NA	NA	both_sexes	0.165813	0.46566
ENSG00000088205	DDX18	NO	NA	NA	NA	NA	NA	NA	both_sexes	0.228223	0.209563
ENSG00000088247	KHSRP	NO	NA	NA	NA	NA	NA	NA	both_sexes	0.293422	0.276519
ENSG00000088256	GNA11	NO	NA	NA	NA	NA	NA	NA	both_sexes	0.790875	0.78182
ENSG00000088280	ASAP3	YES	0	0	0	0	0	0	both_sexes	0.771789	0.830094
ENSG00000088298	EDEM2	NO	NA	NA	NA	NA	NA	NA	both_sexes	0.753383	0.754019
ENSG00000088305	DNMT3B	NO	NA	NA	NA	NA	NA	NA	both_sexes	0.739558	0.727267
ENSG00000088320	REM1	NO	NA	NA	NA	NA	NA	NA	both_sexes	0.206365	0.174224
ENSG00000088325	TPX2	NO	NA	NA	NA	NA	NA	NA	both_sexes	0.747078	0.725136
ENSG00000088356	PDRG1	NO	NA	NA	NA	NA	NA	NA	both_sexes	0.942806	0.923753
ENSG00000088367	EPB41L1	NO	NA	NA	NA	NA	NA	NA	both_sexes	0.706172	0.692295
ENSG00000088386	SLC15A1	NO	NA	NA	NA	NA	NA	NA	both_sexes	0.865668	0.831566
ENSG00000088387	DOCK9	NO	NA	NA	NA	NA	NA	NA	both_sexes	0.132552	0.134564
ENSG00000088448	ANKRD10	NO	NA	NA	NA	NA	NA	NA	both_sexes	0.681443	0.700676
ENSG00000088451	TGDS	NO	NA	NA	NA	NA	NA	NA	both_sexes	0.506328	0.533112
ENSG00000088538	DOCK3	NO	NA	NA	NA	NA	NA	NA	both_sexes	0.97848	0.985526
ENSG00000088543	C3orf18	NO	NA	NA	NA	NA	NA	NA	both_sexes	0.351238	0.322915
ENSG00000088682	COQ9	NO	NA	NA	NA	NA	NA	NA	both_sexes	0.597086	0.884514
ENSG00000088726	TMEM40	YES	1	0	0	1	0	2	both_sexes	0.886157	0.800045
ENSG00000088727	KIF9	NO	NA	NA	NA	NA	NA	NA	both_sexes	0.737738	0.589324
ENSG00000088756	ARHGAP28	NO	NA	NA	NA	NA	NA	NA	both_sexes	0.607404	0.316017
ENSG00000088766	CRLS1	NO	NA	NA	NA	NA	NA	NA	both_sexes	0.696996	0.590047
ENSG00000088808	PPP1R13B	NO	NA	NA	NA	NA	NA	NA	both_sexes	0.118504	0.144225
ENSG00000088812	ATRN	NO	NA	NA	NA	NA	NA	NA	both_sexes	0.0496449	0.0530046
ENSG00000088826	SMOX	NO	NA	NA	NA	NA	NA	NA	both_sexes	0.395024	0.244806
ENSG00000088827	SIGLEC1	NO	NA	NA	NA	NA	NA	NA	both_sexes	0.0206812	0.0985833
ENSG00000088832	FKBP1A	NO	NA	NA	NA	NA	NA	NA	both_sexes	0.1614	0.1614
ENSG00000088833	NSFL1C	NO	NA	NA	NA	NA	NA	NA	both_sexes	0.0688206	0.241785
ENSG00000088836	SLC4A11	NO	NA	NA	NA	NA	NA	NA	both_sexes	0.811574	0.839778
ENSG00000088854	DNAAF9	NO	NA	NA	NA	NA	NA	NA	both_sexes	0.829144	0.847741
ENSG00000088876	ZNF343	NO	NA	NA	NA	NA	NA	NA	both_sexes	0.323448	0.239862
ENSG00000088881	EBF4	NO	NA	NA	NA	NA	NA	NA	both_sexes	0.0762019	0.0741292
ENSG00000088882	CPXM1	NO	NA	NA	NA	NA	NA	NA	both_sexes	0.39917	0.366903
ENSG00000088888	MAVS	NO	NA	NA	NA	NA	NA	NA	both_sexes	0.555839	0.523157
ENSG00000088899	LZTS3	NO	NA	NA	NA	NA	NA	NA	both_sexes	0.593435	0.799962
ENSG00000088926	F11	NO	NA	NA	NA	NA	NA	NA	both_sexes	0.518992	0.557621
ENSG00000088930	XRN2	YES	1	0	0	0	0	1	both_sexes	0.627299	0.662663
ENSG00000088970	KIZ	YES	0	0	0	0	0	0	both_sexes	0.368286	0.492187
ENSG00000088986	DYNLL1	NO	NA	NA	NA	NA	NA	NA	both_sexes	0.165273	0.057625
ENSG00000088992	TESC	NO	NA	NA	NA	NA	NA	NA	both_sexes	0.97743	0.984717
ENSG00000089006	SNX5	NO	NA	NA	NA	NA	NA	NA	both_sexes	0.508056	0.6003
ENSG00000089009	RPL6	YES	0	0	0	0	0	0	both_sexes	0.19976	0.271464
ENSG00000089012	SIRPG	NO	NA	NA	NA	NA	NA	NA	both_sexes	0.548111	0.599461
ENSG00000089022	MAPKAPK5	YES	0	0	0	0	0	0	both_sexes	0.0400479	0.0281594
ENSG00000089041	P2RX7	NO	NA	NA	NA	NA	NA	NA	both_sexes	0.542408	0.527239
ENSG00000089048	ESF1	NO	NA	NA	NA	NA	NA	NA	both_sexes	0.72709	0.517686
ENSG00000089050	RBBP9	NO	NA	NA	NA	NA	NA	NA	both_sexes	0.243632	0.217854
ENSG00000089053	ANAPC5	NO	NA	NA	NA	NA	NA	NA	both_sexes	0.253084	0.347218
ENSG00000089057	SLC23A2	NO	NA	NA	NA	NA	NA	NA	both_sexes	0.257912	0.378354
ENSG00000089060	SLC8B1	YES	0	0	0	0	0	0	both_sexes	0.660107	0.727832
ENSG00000089063	TMEM230	NO	NA	NA	NA	NA	NA	NA	both_sexes	0.790054	0.482977
ENSG00000089091	DZANK1	NO	NA	NA	NA	NA	NA	NA	both_sexes	0.717966	0.863773
ENSG00000089094	KDM2B	NO	NA	NA	NA	NA	NA	NA	both_sexes	0.128381	0.167833
ENSG00000089101	CFAP61	NO	NA	NA	NA	NA	NA	NA	both_sexes	0.881138	0.830238
ENSG00000089116	LHX5	YES	0	0	0	0	0	0	both_sexes	0.754027	0.756692
ENSG00000089123	TASP1	NO	NA	NA	NA	NA	NA	NA	both_sexes	0.487143	0.503484
ENSG00000089127	OAS1	YES	0	0	0	0	0	0	both_sexes	0.664235	0.698799
ENSG00000089154	GCN1	YES	0	0	0	0	0	0	both_sexes	0.334014	0.136873
ENSG00000089157	RPLP0	YES	0	0	0	0	0	0	both_sexes	0.175246	0.162274
ENSG00000089159	PXN	YES	0	0	1	0	0	1	both_sexes	0.87888	0.829285
ENSG00000089163	SIRT4	YES	0	0	0	0	0	0	both_sexes	0.632485	0.688342
ENSG00000089169	RPH3A	YES	0	0	0	0	0	0	both_sexes	0.322295	0.345867
ENSG00000089177	KIF16B	NO	NA	NA	NA	NA	NA	NA	both_sexes	0.6149	0.66198
ENSG00000089195	TRMT6	NO	NA	NA	NA	NA	NA	NA	both_sexes	0.608376	0.629315
ENSG00000089199	CHGB	NO	NA	NA	NA	NA	NA	NA	both_sexes	0.224339	0.277196
ENSG00000089220	PEBP1	NO	NA	NA	NA	NA	NA	NA	both_sexes	0.661943	0.815528
ENSG00000089225	TBX5	YES	1	1	0	1	0	3	both_sexes	0.0185297	0.0119873
ENSG00000089234	BRAP	YES	0	0	0	0	0	0	both_sexes	0.872527	0.862922
ENSG00000089248	ERP29	YES	0	0	0	0	0	0	both_sexes	0.876311	0.913051
ENSG00000089250	NOS1	NO	NA	NA	NA	NA	NA	NA	both_sexes	0.888216	0.89321
ENSG00000089280	FUS	NO	NA	NA	NA	NA	NA	NA	both_sexes	0.349294	0.305193
ENSG00000089327	FXYD5	NO	NA	NA	NA	NA	NA	NA	both_sexes	0.850542	0.920651
ENSG00000089335	ZNF302	NO	NA	NA	NA	NA	NA	NA	both_sexes	0.790671	0.756249
ENSG00000089351	GRAMD1A	NO	NA	NA	NA	NA	NA	NA	both_sexes	0.7201	0.812859
ENSG00000089356	FXYD3	NO	NA	NA	NA	NA	NA	NA	both_sexes	0.591324	0.54494
ENSG00000089486	CDIP1	NO	NA	NA	NA	NA	NA	NA	both_sexes	0.876173	0.86548
ENSG00000089505	CMTM1	NO	NA	NA	NA	NA	NA	NA	both_sexes	0.432882	0.394903
ENSG00000089558	KCNH4	NO	NA	NA	NA	NA	NA	NA	both_sexes	0.742281	0.783217
ENSG00000089597	GANAB	NO	NA	NA	NA	NA	NA	NA	both_sexes	0.923596	0.941204
ENSG00000089639	GMIP	NO	NA	NA	NA	NA	NA	NA	both_sexes	0.854893	0.8341
ENSG00000089685	BIRC5	NO	NA	NA	NA	NA	NA	NA	both_sexes	0.299501	0.422761
ENSG00000089692	LAG3	NO	NA	NA	NA	NA	NA	NA	both_sexes	0.655006	0.622294
ENSG00000089693	MLF 2.00	NO	NA	NA	NA	NA	NA	NA	both_sexes	0.352757	0.321371
ENSG00000089723	OTUB2	NO	NA	NA	NA	NA	NA	NA	both_sexes	0.700228	0.711464
ENSG00000089737	DDX24	NO	NA	NA	NA	NA	NA	NA	both_sexes	0.4209	0.624157
ENSG00000089775	ZBTB25	YES	0	0	0	0	0	0	both_sexes	0.0794303	0.0669262
ENSG00000089818	NECAP1	NO	NA	NA	NA	NA	NA	NA	both_sexes	0.97204	0.981219
ENSG00000089847	ANKRD24	NO	NA	NA	NA	NA	NA	NA	both_sexes	0.00182709	0.232233
ENSG00000089876	DHX32	NO	NA	NA	NA	NA	NA	NA	both_sexes	0.518299	0.589495
ENSG00000089902	RCOR1	NO	NA	NA	NA	NA	NA	NA	both_sexes	0.0641083	0.0404453
ENSG00000089916	GPATCH2L	NO	NA	NA	NA	NA	NA	NA	both_sexes	0.974049	0.963954
ENSG00000090006	LTBP4	NO	NA	NA	NA	NA	NA	NA	both_sexes	0.153086	0.164921
ENSG00000090013	BLVRB	NO	NA	NA	NA	NA	NA	NA	both_sexes	0.491349	0.576202
ENSG00000090020	SLC9A1	NO	NA	NA	NA	NA	NA	NA	both_sexes	0.455362	0.525353
ENSG00000090054	SPTLC1	NO	NA	NA	NA	NA	NA	NA	both_sexes	0.443428	0.351231
ENSG00000090060	PAPOLA	NO	NA	NA	NA	NA	NA	NA	both_sexes	0.0418974	0.0630159
ENSG00000090061	CCNK	NO	NA	NA	NA	NA	NA	NA	both_sexes	0.185636	0.197628
ENSG00000090097	PCBP4	NO	NA	NA	NA	NA	NA	NA	both_sexes	0.819938	0.743926
ENSG00000090104	RGS1	NO	NA	NA	NA	NA	NA	NA	both_sexes	0.869083	0.907201
ENSG00000090238	YPEL3	YES	0	0	0	0	0	0	both_sexes	0.391217	0.41656
ENSG00000090263	MRPS33	NO	NA	NA	NA	NA	NA	NA	both_sexes	0.563807	0.584287
ENSG00000090266	NDUFB2	NO	NA	NA	NA	NA	NA	NA	both_sexes	0.679574	0.716202
ENSG00000090273	NUDC	NO	NA	NA	NA	NA	NA	NA	both_sexes	0.205364	0.217645
ENSG00000090316	MAEA	YES	0	0	0	1	0	1	both_sexes	0.877461	0.919079
ENSG00000090339	ICAM1	NO	NA	NA	NA	NA	NA	NA	both_sexes	0.418625	0.442853
ENSG00000090372	STRN4	NO	NA	NA	NA	NA	NA	NA	both_sexes	0.745501	0.76061
ENSG00000090376	IRAK3	NO	NA	NA	NA	NA	NA	NA	both_sexes	0.825306	0.88851
ENSG00000090382	LYZ	YES	0	0	0	0	0	0	both_sexes	0.758529	0.720569
ENSG00000090402	SI	NO	NA	NA	NA	NA	NA	NA	both_sexes	0.329717	0.354373
ENSG00000090432	MUL1	NO	NA	NA	NA	NA	NA	NA	both_sexes	0.077208	0.0675835
ENSG00000090447	TFAP4	YES	0	0	0	0	0	0	both_sexes	0.854228	0.793962
ENSG00000090470	PDCD7	NO	NA	NA	NA	NA	NA	NA	both_sexes	0.560327	0.605065
ENSG00000090487	SPG21	NO	NA	NA	NA	NA	NA	NA	both_sexes	0.255113	0.215018
ENSG00000090512	FETUB	NO	NA	NA	NA	NA	NA	NA	both_sexes	0.737203	0.56557
ENSG00000090520	DNAJB11	NO	NA	NA	NA	NA	NA	NA	both_sexes	0.00524897	0.00691706
ENSG00000090530	P3H2	NO	NA	NA	NA	NA	NA	NA	both_sexes	0.539716	0.515792
ENSG00000090534	THPO	YES	0	0	0	0	0	0	both_sexes	0.0776371	0.0697835
ENSG00000090539	CHRD	YES	0	0	0	0	0	0	both_sexes	0.779182	0.803175
ENSG00000090554	FLT3LG	NO	NA	NA	NA	NA	NA	NA	both_sexes	0.203563	0.117913
ENSG00000090565	RAB11FIP3	YES	0	0	0	0	0	0	both_sexes	0.755662	0.797387
ENSG00000090581	GNPTG	NO	NA	NA	NA	NA	NA	NA	both_sexes	0.500542	0.432703
ENSG00000090612	ZNF268	NO	NA	NA	NA	NA	NA	NA	both_sexes	0.806852	0.860354
ENSG00000090615	GOLGA3	YES	0	0	0	0	0	0	both_sexes	0.400695	0.199526
ENSG00000090621	PABPC4	NO	NA	NA	NA	NA	NA	NA	both_sexes	0.183958	0.16598
ENSG00000090659	CD209	NO	NA	NA	NA	NA	NA	NA	both_sexes	0.167049	0.17082
ENSG00000090661	CERS4	NO	NA	NA	NA	NA	NA	NA	both_sexes	0.608619	0.600633
ENSG00000090674	MCOLN1	NO	NA	NA	NA	NA	NA	NA	both_sexes	0.826326	0.781439
ENSG00000090686	USP48	YES	0	0	0	0	0	0	both_sexes	0.100485	0.0885901
ENSG00000090857	PDPR	NO	NA	NA	NA	NA	NA	NA	both_sexes	0.974059	0.976937
ENSG00000090861	AARS1	NO	NA	NA	NA	NA	NA	NA	both_sexes	0.354197	0.503524
ENSG00000090863	GLG1	NO	NA	NA	NA	NA	NA	NA	both_sexes	0.204631	0.188196
ENSG00000090905	TNRC6A	YES	0	0	0	0	0	0	both_sexes	0.964445	0.95707
ENSG00000090924	PLEKHG2	NO	NA	NA	NA	NA	NA	NA	both_sexes	0.826393	0.789723
ENSG00000090932	DLL3	NO	NA	NA	NA	NA	NA	NA	both_sexes	0.0481144	0.0464053
ENSG00000090971	NAT14	NO	NA	NA	NA	NA	NA	NA	both_sexes	0.116866	0.171528
ENSG00000090975	PITPNM2	YES	0	0	0	0	0	0	both_sexes	0.874205	0.806563
ENSG00000090989	EXOC1	NO	NA	NA	NA	NA	NA	NA	both_sexes	0.865136	0.882218
ENSG00000091009	RBM27	NO	NA	NA	NA	NA	NA	NA	both_sexes	0.620417	0.741419
ENSG00000091010	POU4F3	NO	NA	NA	NA	NA	NA	NA	both_sexes	0.813132	0.845367
ENSG00000091039	OSBPL8	NO	NA	NA	NA	NA	NA	NA	both_sexes	0.937522	0.940765
ENSG00000091073	DTX2	NO	NA	NA	NA	NA	NA	NA	both_sexes	0.25314	0.324514
ENSG00000091106	NLRC4	NO	NA	NA	NA	NA	NA	NA	both_sexes	0.470396	0.330879
ENSG00000091127	PUS7	NO	NA	NA	NA	NA	NA	NA	both_sexes	0.330551	0.249163
ENSG00000091128	LAMB4	NO	NA	NA	NA	NA	NA	NA	both_sexes	0.431862	0.448504
ENSG00000091129	NRCAM	NO	NA	NA	NA	NA	NA	NA	both_sexes	0.766472	0.846197
ENSG00000091136	LAMB1	NO	NA	NA	NA	NA	NA	NA	both_sexes	0.831461	0.85278
ENSG00000091137	SLC26A4	YES	0	0	0	0	0	0	both_sexes	0.335586	0.142902
ENSG00000091138	SLC26A3	YES	0	0	0	0	0	0	both_sexes	0.387454	0.363683
ENSG00000091140	DLD	NO	NA	NA	NA	NA	NA	NA	both_sexes	0.851275	0.88051
ENSG00000091157	WDR7	NO	NA	NA	NA	NA	NA	NA	both_sexes	0.682827	0.523954
ENSG00000091164	TXNL1	NO	NA	NA	NA	NA	NA	NA	both_sexes	0.405448	0.413643
ENSG00000091181	IL5RA	NO	NA	NA	NA	NA	NA	NA	both_sexes	0.780276	0.837051
ENSG00000091262	ABCC6	YES	0	0	0	0	0	0	both_sexes	0.760612	0.826767
ENSG00000091317	CMTM6	NO	NA	NA	NA	NA	NA	NA	both_sexes	0.537096	0.505745
ENSG00000091409	ITGA6	NO	NA	NA	NA	NA	NA	NA	both_sexes	0.0499562	0.0581517
ENSG00000091428	RAPGEF4	NO	NA	NA	NA	NA	NA	NA	both_sexes	0.324875	0.235164
ENSG00000091436	MAP3K20	NO	NA	NA	NA	NA	NA	NA	both_sexes	0.0336824	0.0235302
ENSG00000091483	FH	NO	NA	NA	NA	NA	NA	NA	both_sexes	0.702656	0.698447
ENSG00000091490	SEL1L3	NO	NA	NA	NA	NA	NA	NA	both_sexes	0.837826	0.825247
ENSG00000091513	TF	NO	NA	NA	NA	NA	NA	NA	both_sexes	0.260377	0.324585
ENSG00000091527	CDV3	NO	NA	NA	NA	NA	NA	NA	both_sexes	0.93452	0.909258
ENSG00000091536	MYO15A	NO	NA	NA	NA	NA	NA	NA	both_sexes	0.89479	0.801616
ENSG00000091542	ALKBH5	NO	NA	NA	NA	NA	NA	NA	both_sexes	0.614196	0.56836
ENSG00000091583	APOH	YES	1	0	0	0	1	2	both_sexes	0.899159	0.929375
ENSG00000091592	NLRP1	NO	NA	NA	NA	NA	NA	NA	both_sexes	0.495575	0.450228
ENSG00000091622	PITPNM3	NO	NA	NA	NA	NA	NA	NA	both_sexes	0.745689	0.739272
ENSG00000091640	SPAG7	NO	NA	NA	NA	NA	NA	NA	both_sexes	3.43714e-05	0.161785
ENSG00000091651	ORC6	NO	NA	NA	NA	NA	NA	NA	both_sexes	0.0145188	0.0150659
ENSG00000091656	ZFHX4	NO	NA	NA	NA	NA	NA	NA	both_sexes	0.616229	0.57981
ENSG00000091664	SLC17A6	YES	0	0	0	0	0	0	both_sexes	0.0158523	0.0115833
ENSG00000091704	CPA1	NO	NA	NA	NA	NA	NA	NA	both_sexes	0.550565	0.468826
ENSG00000091732	ZC3HC1	NO	NA	NA	NA	NA	NA	NA	both_sexes	0.392686	0.346589
ENSG00000091831	ESR1	NO	NA	NA	NA	NA	NA	NA	both_sexes	0.854449	0.810473
ENSG00000091844	RGS17	NO	NA	NA	NA	NA	NA	NA	both_sexes	0.449643	0.466225
ENSG00000091879	ANGPT2	NO	NA	NA	NA	NA	NA	NA	both_sexes	0.651233	0.498646
ENSG00000091947	TMEM101	NO	NA	NA	NA	NA	NA	NA	both_sexes	0.577989	0.574836
ENSG00000091972	CD200	YES	0	0	0	0	0	0	both_sexes	0.292566	0.292566
ENSG00000091986	CCDC80	NO	NA	NA	NA	NA	NA	NA	both_sexes	0.412543	0.458153
ENSG00000092009	CMA1	NO	NA	NA	NA	NA	NA	NA	both_sexes	0.183564	0.270646
ENSG00000092010	PSME1	NO	NA	NA	NA	NA	NA	NA	both_sexes	0.984765	0.98867
ENSG00000092020	PPP2R3C	YES	0	0	0	0	0	0	both_sexes	0.877252	0.883015
ENSG00000092036	HAUS4	YES	0	0	0	0	0	0	both_sexes	0.386492	0.329485
ENSG00000092051	JPH4	YES	0	0	0	0	0	0	both_sexes	0.0890727	0.123344
ENSG00000092054	MYH7	YES	1	0	0	1	0	2	both_sexes	3.09006e-05	2.06256e-05
ENSG00000092067	CEBPE	YES	0	0	0	0	0	0	both_sexes	0.565384	0.524033
ENSG00000092068	SLC7A8	YES	0	0	0	0	0	0	both_sexes	0.650087	0.680047
ENSG00000092094	OSGEP	NO	NA	NA	NA	NA	NA	NA	both_sexes	0.90514	0.878798
ENSG00000092096	SLC22A17	YES	1	0	0	0	0	1	both_sexes	0.440821	0.399833
ENSG00000092098	RNF31	NO	NA	NA	NA	NA	NA	NA	both_sexes	0.882154	0.901432
ENSG00000092108	SCFD1	NO	NA	NA	NA	NA	NA	NA	both_sexes	0.604925	0.680946
ENSG00000092140	G2E3	NO	NA	NA	NA	NA	NA	NA	both_sexes	0.77757	0.824835
ENSG00000092148	HECTD1	NO	NA	NA	NA	NA	NA	NA	both_sexes	0.737306	0.79386
ENSG00000092199	HNRNPC	NO	NA	NA	NA	NA	NA	NA	both_sexes	0.10015	0.11722
ENSG00000092200	RPGRIP1	NO	NA	NA	NA	NA	NA	NA	both_sexes	0.794797	0.763072
ENSG00000092201	SUPT16H	NO	NA	NA	NA	NA	NA	NA	both_sexes	0.706625	0.723931
ENSG00000092203	TOX4	NO	NA	NA	NA	NA	NA	NA	both_sexes	0.866095	0.855755
ENSG00000092208	GEMIN2	NO	NA	NA	NA	NA	NA	NA	both_sexes	0.436036	0.437729
ENSG00000092295	TGM1	NO	NA	NA	NA	NA	NA	NA	both_sexes	0.605752	0.750207
ENSG00000092330	TINF2	NO	NA	NA	NA	NA	NA	NA	both_sexes	0.715242	0.787505
ENSG00000092345	DAZL	NO	NA	NA	NA	NA	NA	NA	both_sexes	0.50749	0.417093
ENSG00000092421	SEMA6A	NO	NA	NA	NA	NA	NA	NA	both_sexes	0.914845	0.926045
ENSG00000092439	TRPM7	NO	NA	NA	NA	NA	NA	NA	both_sexes	0.731502	0.788915
ENSG00000092445	TYRO3	NO	NA	NA	NA	NA	NA	NA	both_sexes	0.700283	0.305375
ENSG00000092470	WDR76	NO	NA	NA	NA	NA	NA	NA	both_sexes	0.811254	0.835124
ENSG00000092529	CAPN3	NO	NA	NA	NA	NA	NA	NA	both_sexes	0.2826	0.50572
ENSG00000092531	SNAP23	NO	NA	NA	NA	NA	NA	NA	both_sexes	0.716125	0.717637
ENSG00000092607	TBX15	NO	NA	NA	NA	NA	NA	NA	both_sexes	0.307077	0.205254
ENSG00000092621	PHGDH	NO	NA	NA	NA	NA	NA	NA	both_sexes	0.950947	0.945467
ENSG00000092758	COL9A3	YES	0	0	0	0	0	0	both_sexes	0.387658	0.533563
ENSG00000092820	EZR	NO	NA	NA	NA	NA	NA	NA	both_sexes	0.938325	0.925401
ENSG00000092841	MYL6	YES	0	0	0	0	0	0	both_sexes	0.0964542	0.0672863
ENSG00000092847	AGO1	YES	0	0	0	0	0	0	both_sexes	0.748512	0.738506
ENSG00000092850	TEKT2	YES	0	0	0	0	0	0	both_sexes	0.330664	0.367994
ENSG00000092853	CLSPN	NO	NA	NA	NA	NA	NA	NA	both_sexes	0.935779	0.930535
ENSG00000092871	RFFL	NO	NA	NA	NA	NA	NA	NA	both_sexes	0.716449	0.690061
ENSG00000092929	UNC13D	NO	NA	NA	NA	NA	NA	NA	both_sexes	0.84831	0.874004
ENSG00000092931	MFSD11	NO	NA	NA	NA	NA	NA	NA	both_sexes	0.260203	0.214504
ENSG00000092964	DPYSL2	YES	0	0	0	0	0	0	both_sexes	0.232851	0.253225
ENSG00000092969	TGFB2	YES	1	1	0	0	0	2	both_sexes	0.682262	0.792974
ENSG00000092978	GPATCH2	YES	0	0	0	0	0	0	both_sexes	0.317971	0.26226
ENSG00000093000	NUP50	NO	NA	NA	NA	NA	NA	NA	both_sexes	0.915764	0.934307
ENSG00000093009	CDC45	NO	NA	NA	NA	NA	NA	NA	both_sexes	0.956793	0.967618
ENSG00000093010	COMT	NO	NA	NA	NA	NA	NA	NA	both_sexes	0.425733	0.356994
ENSG00000093072	ADA2	NO	NA	NA	NA	NA	NA	NA	both_sexes	0.74329	0.781487
ENSG00000093144	ECHDC1	NO	NA	NA	NA	NA	NA	NA	both_sexes	0.801826	0.689424
ENSG00000093167	LRRFIP2	YES	0	0	0	1	0	1	both_sexes	0.891979	0.926093
ENSG00000093183	SEC22C	NO	NA	NA	NA	NA	NA	NA	both_sexes	0.906423	0.909684
ENSG00000093217	XYLB	YES	1	0	0	0	0	1	both_sexes	0.91442	0.896981
ENSG00000094755	GABRP	NO	NA	NA	NA	NA	NA	NA	both_sexes	0.55784	0.44343
ENSG00000094796	KRT31	NO	NA	NA	NA	NA	NA	NA	both_sexes	0.608256	0.616438
ENSG00000094804	CDC6	NO	NA	NA	NA	NA	NA	NA	both_sexes	0.428808	0.418516
ENSG00000094880	CDC23	YES	1	0	0	0	0	1	both_sexes	0.255014	0.267325
ENSG00000094914	AAAS	NO	NA	NA	NA	NA	NA	NA	both_sexes	0.327287	0.279752
ENSG00000094916	CBX5	NO	NA	NA	NA	NA	NA	NA	both_sexes	0.548128	0.274544
ENSG00000094963	FMO2	NO	NA	NA	NA	NA	NA	NA	both_sexes	0.0396352	0.0250021
ENSG00000094975	SUCO	NO	NA	NA	NA	NA	NA	NA	both_sexes	0.77129	0.791379
ENSG00000095002	MSH2	NO	NA	NA	NA	NA	NA	NA	both_sexes	0.859304	0.697928
ENSG00000095015	MAP3K1	NO	NA	NA	NA	NA	NA	NA	both_sexes	0.291994	0.386896
ENSG00000095059	DHPS	NO	NA	NA	NA	NA	NA	NA	both_sexes	0.536452	0.663147
ENSG00000095066	HOOK2	NO	NA	NA	NA	NA	NA	NA	both_sexes	0.603585	0.66898
ENSG00000095110	NXPE1	NO	NA	NA	NA	NA	NA	NA	both_sexes	0.636099	0.678801
ENSG00000095139	ARCN1	NO	NA	NA	NA	NA	NA	NA	both_sexes	0.398583	0.444957
ENSG00000095203	EPB41L4B	NO	NA	NA	NA	NA	NA	NA	both_sexes	0.234038	0.168556
ENSG00000095209	TMEM38B	NO	NA	NA	NA	NA	NA	NA	both_sexes	0.936481	0.945762
ENSG00000095261	PSMD5	NO	NA	NA	NA	NA	NA	NA	both_sexes	0.855014	0.830435
ENSG00000095303	PTGS1	NO	NA	NA	NA	NA	NA	NA	both_sexes	0.790427	0.822681
ENSG00000095319	NUP188	NO	NA	NA	NA	NA	NA	NA	both_sexes	0.741573	0.642035
ENSG00000095321	CRAT	NO	NA	NA	NA	NA	NA	NA	both_sexes	0.0170995	0.0140599
ENSG00000095370	SH2D3C	NO	NA	NA	NA	NA	NA	NA	both_sexes	0.0174875	0.0139504
ENSG00000095380	NANS	YES	0	0	0	0	0	0	both_sexes	0.991117	0.994045
ENSG00000095383	TBC1D2	YES	0	0	0	0	0	0	both_sexes	0.119364	0.123571
ENSG00000095397	WHRN	NO	NA	NA	NA	NA	NA	NA	both_sexes	0.0319824	0.0257343
ENSG00000095464	PDE6C	NO	NA	NA	NA	NA	NA	NA	both_sexes	0.792781	0.723694
ENSG00000095485	CWF19L1	NO	NA	NA	NA	NA	NA	NA	both_sexes	0.380415	0.350298
ENSG00000095539	SEMA4G	NO	NA	NA	NA	NA	NA	NA	both_sexes	0.539788	0.621048
ENSG00000095564	BTAF1	NO	NA	NA	NA	NA	NA	NA	both_sexes	0.707362	0.507017
ENSG00000095574	IKZF5	NO	NA	NA	NA	NA	NA	NA	both_sexes	0.751223	0.85937
ENSG00000095585	BLNK	NO	NA	NA	NA	NA	NA	NA	both_sexes	0.902059	0.90572
ENSG00000095587	TLL2	NO	NA	NA	NA	NA	NA	NA	both_sexes	0.954518	0.940386
ENSG00000095596	CYP26A1	NO	NA	NA	NA	NA	NA	NA	both_sexes	0.466197	0.428218
ENSG00000095627	TDRD1	YES	0	0	0	0	0	0	both_sexes	0.860268	0.866905
ENSG00000095637	SORBS1	NO	NA	NA	NA	NA	NA	NA	both_sexes	0.00105947	0.00138551
ENSG00000095713	CRTAC1	NO	NA	NA	NA	NA	NA	NA	both_sexes	0.762064	0.842663
ENSG00000095739	BAMBI	NO	NA	NA	NA	NA	NA	NA	both_sexes	0.0237335	0.0268734
ENSG00000095752	IL11	NO	NA	NA	NA	NA	NA	NA	both_sexes	0.522256	0.601697
ENSG00000095777	MYO3A	NO	NA	NA	NA	NA	NA	NA	both_sexes	0.370329	0.720892
ENSG00000095787	WAC	NO	NA	NA	NA	NA	NA	NA	both_sexes	0.824058	0.790364
ENSG00000095794	CREM	NO	NA	NA	NA	NA	NA	NA	both_sexes	0.386343	0.365774
ENSG00000095906	NUBP2	YES	0	0	0	0	0	0	both_sexes	0.973815	0.97619
ENSG00000095917	TPSD1	NO	NA	NA	NA	NA	NA	NA	both_sexes	0.640872	0.734938
ENSG00000095932	SMIM24	NO	NA	NA	NA	NA	NA	NA	both_sexes	0.910536	0.918142
ENSG00000095951	HIVEP1	NO	NA	NA	NA	NA	NA	NA	both_sexes	0.0179661	0.0237458
ENSG00000095970	TREM2	NO	NA	NA	NA	NA	NA	NA	both_sexes	0.844626	0.854726
ENSG00000095981	KCNK16	NO	NA	NA	NA	NA	NA	NA	both_sexes	0.65181	0.701219
ENSG00000096006	CRISP3	NO	NA	NA	NA	NA	NA	NA	both_sexes	0.797441	0.681158
ENSG00000096060	FKBP5	NO	NA	NA	NA	NA	NA	NA	both_sexes	0.433292	0.227739
ENSG00000096063	SRPK1	NO	NA	NA	NA	NA	NA	NA	both_sexes	0.468516	0.500172
ENSG00000096070	BRPF3	YES	0	0	0	0	0	0	both_sexes	0.97318	0.964777
ENSG00000096080	MRPS18A	YES	0	0	0	0	0	0	both_sexes	0.274743	0.30636
ENSG00000096088	PGC	NO	NA	NA	NA	NA	NA	NA	both_sexes	0.364605	0.419167
ENSG00000096092	TMEM14A	NO	NA	NA	NA	NA	NA	NA	both_sexes	0.582844	0.591046
ENSG00000096093	EFHC1	NO	NA	NA	NA	NA	NA	NA	both_sexes	0.0967533	0.120886
ENSG00000096264	NCR2	NO	NA	NA	NA	NA	NA	NA	both_sexes	0.511544	0.51303
ENSG00000096384	HSP90AB1	YES	0	1	0	0	0	1	both_sexes	0.0024384	0.00312692
ENSG00000096395	MLN	YES	0	0	0	0	0	0	both_sexes	0.445738	0.456514
ENSG00000096401	CDC5L	NO	NA	NA	NA	NA	NA	NA	both_sexes	0.821015	0.854991
ENSG00000096433	ITPR3	NO	NA	NA	NA	NA	NA	NA	both_sexes	0.187131	0.13936
ENSG00000096654	ZNF184	NO	NA	NA	NA	NA	NA	NA	both_sexes	0.814937	0.865536
ENSG00000096696	DSP	YES	0	0	0	1	0	1	both_sexes	0.00164918	0.00204675
ENSG00000096717	SIRT1	YES	1	0	0	0	0	1	both_sexes	0.879732	0.885744
ENSG00000096746	HNRNPH3	YES	0	0	0	0	0	0	both_sexes	0.193322	0.2
ENSG00000096872	IFT74	NO	NA	NA	NA	NA	NA	NA	both_sexes	0.596332	0.676263
ENSG00000096968	JAK2	NO	NA	NA	NA	NA	NA	NA	both_sexes	0.000943022	0.00120173
ENSG00000096996	IL12RB1	NO	NA	NA	NA	NA	NA	NA	both_sexes	0.757709	0.65857
ENSG00000097007	ABL1	NO	NA	NA	NA	NA	NA	NA	both_sexes	0.536021	0.576516
ENSG00000097021	ACOT7	NO	NA	NA	NA	NA	NA	NA	both_sexes	0.729928	0.757554
ENSG00000097033	SH3GLB1	NO	NA	NA	NA	NA	NA	NA	both_sexes	0.596786	0.589013
ENSG00000097046	CDC7	NO	NA	NA	NA	NA	NA	NA	both_sexes	0.72093	0.693061
ENSG00000097096	SYDE2	NO	NA	NA	NA	NA	NA	NA	both_sexes	0.0747394	0.0772092
ENSG00000099139	PCSK5	NO	NA	NA	NA	NA	NA	NA	both_sexes	0.820084	0.503245
ENSG00000099194	SCD	NO	NA	NA	NA	NA	NA	NA	both_sexes	0.067398	0.0445485
ENSG00000099203	TMED1	NO	NA	NA	NA	NA	NA	NA	both_sexes	0.488055	0.559434
ENSG00000099204	ABLIM1	YES	1	1	1	1	0	4	both_sexes	0.49673	0.731495
ENSG00000099219	ERMP1	NO	NA	NA	NA	NA	NA	NA	both_sexes	0.0169429	0.0207107
ENSG00000099246	RAB18	NO	NA	NA	NA	NA	NA	NA	both_sexes	0.668837	0.724947
ENSG00000099250	NRP1	YES	0	0	0	0	0	0	both_sexes	0.291161	0.289154
ENSG00000099256	PRTFDC1	NO	NA	NA	NA	NA	NA	NA	both_sexes	0.242018	0.220227
ENSG00000099260	PALMD	YES	0	0	0	0	0	0	both_sexes	0.0479261	0.0489963
ENSG00000099282	TSPAN15	NO	NA	NA	NA	NA	NA	NA	both_sexes	0.0727321	0.0840143
ENSG00000099284	MACROH2A2	NO	NA	NA	NA	NA	NA	NA	both_sexes	0.774558	0.800481
ENSG00000099290	WASHC2A	NO	NA	NA	NA	NA	NA	NA	both_sexes	0.58896	0.637535
ENSG00000099308	MAST3	NO	NA	NA	NA	NA	NA	NA	both_sexes	0.508625	0.675008
ENSG00000099326	MZF1	NO	NA	NA	NA	NA	NA	NA	both_sexes	0.122486	0.131238
ENSG00000099330	OCEL1	NO	NA	NA	NA	NA	NA	NA	both_sexes	0.267425	0.236823
ENSG00000099331	MYO9B	NO	NA	NA	NA	NA	NA	NA	both_sexes	0.111132	0.08197
ENSG00000099337	KCNK6	NO	NA	NA	NA	NA	NA	NA	both_sexes	0.681499	0.747614
ENSG00000099338	CATSPERG	NO	NA	NA	NA	NA	NA	NA	both_sexes	0.706637	0.483778
ENSG00000099341	PSMD8	NO	NA	NA	NA	NA	NA	NA	both_sexes	0.720307	0.743234
ENSG00000099364	FBXL19	NO	NA	NA	NA	NA	NA	NA	both_sexes	0.858222	0.831602
ENSG00000099365	STX1B	NO	NA	NA	NA	NA	NA	NA	both_sexes	0.731105	0.752535
ENSG00000099377	HSD3B7	NO	NA	NA	NA	NA	NA	NA	both_sexes	0.92023	0.916668
ENSG00000099381	SETD1A	NO	NA	NA	NA	NA	NA	NA	both_sexes	0.911833	0.907997
ENSG00000099385	BCL7C	NO	NA	NA	NA	NA	NA	NA	both_sexes	0.122427	0.071932
ENSG00000099617	EFNA2	NO	NA	NA	NA	NA	NA	NA	both_sexes	0.0158624	0.0123198
ENSG00000099622	CIRBP	NO	NA	NA	NA	NA	NA	NA	both_sexes	0.455307	0.408513
ENSG00000099624	ATP5F1D	NO	NA	NA	NA	NA	NA	NA	both_sexes	0.49217	0.488442
ENSG00000099625	CBARP	NO	NA	NA	NA	NA	NA	NA	both_sexes	0.716361	0.75806
ENSG00000099769	IGFALS	YES	0	0	0	0	0	0	both_sexes	0.721552	0.667799
ENSG00000099783	HNRNPM	NO	NA	NA	NA	NA	NA	NA	both_sexes	0.193505	0.157614
ENSG00000099785	MARCHF2	NO	NA	NA	NA	NA	NA	NA	both_sexes	0.348255	0.206303
ENSG00000099795	NDUFB7	NO	NA	NA	NA	NA	NA	NA	both_sexes	0.114405	0.162261
ENSG00000099797	TECR	NO	NA	NA	NA	NA	NA	NA	both_sexes	0.555402	0.57574
ENSG00000099800	TIMM13	YES	0	0	0	0	0	0	both_sexes	0.651575	0.657321
ENSG00000099804	CDC34	NO	NA	NA	NA	NA	NA	NA	both_sexes	0.810506	0.799186
ENSG00000099810	MTAP	NO	NA	NA	NA	NA	NA	NA	both_sexes	0.827527	0.820474
ENSG00000099812	MISP	NO	NA	NA	NA	NA	NA	NA	both_sexes	0.602581	0.48886
ENSG00000099814	CEP170B	NO	NA	NA	NA	NA	NA	NA	both_sexes	0.0284804	0.0264409
ENSG00000099817	POLR2E	NO	NA	NA	NA	NA	NA	NA	both_sexes	0.76853	0.923061
ENSG00000099821	POLRMT	NO	NA	NA	NA	NA	NA	NA	both_sexes	0.912479	0.935647
ENSG00000099822	HCN2	NO	NA	NA	NA	NA	NA	NA	both_sexes	0.245639	0.161046
ENSG00000099834	CDHR5	NO	NA	NA	NA	NA	NA	NA	both_sexes	0.288604	0.239803
ENSG00000099840	IZUMO4	YES	0	0	0	0	0	0	both_sexes	0.839314	0.778162
ENSG00000099849	RASSF7	NO	NA	NA	NA	NA	NA	NA	both_sexes	0.41733	0.445948
ENSG00000099860	GADD45B	YES	0	0	0	0	0	0	both_sexes	0.230679	0.307329
ENSG00000099864	PALM	NO	NA	NA	NA	NA	NA	NA	both_sexes	0.900882	0.900656
ENSG00000099866	MADCAM1	NO	NA	NA	NA	NA	NA	NA	both_sexes	0.72151	0.750864
ENSG00000099875	MKNK2	YES	0	0	0	0	0	0	both_sexes	0.526668	0.547026
[truncated: 16,485 more rows]

## Sheet: ST7 GenePrio RVAS enrichment
Supplementary Table 7: Results from enrichment analysis for RVAS genes and genePrio genes
Original analysis using RVAS data including masks with MAF<1%
GWAS genePrio Score Threshold	RVAS P-value Threshold	N GWAS genes	N RVAS genes	N overlapping genes	N total genes	Fisher exact test OR	Fisher exact test P-value	Fisher exact test Confidence interval
0	exome-wide	3248	15	10	18481	9.4	3.5142e-05	[2.93; 35.1]
0	1x10-5	3248	17	10	18481	6.7	0.000161374	[2.31; 20.8]
0	1x10-4	3248	30	16	18481	5.4	9.51784e-06	[2.46; 11.92]
0	1x10-3	3248	69	31	18481	3.9	1.25196e-07	[2.31; 6.37]
1	exome-wide	766	15	8	18481	26.7	4.17349e-08	[8.43; 86.81]
1	1x10-5	766	17	8	18481	20.8	1.4641e-07	[6.95; 60.89]
1	1x10-4	766	30	11	18481	13.6	1.53266e-08	[5.81; 30.11]
1	1x10-3	766	69	18	18481	8.3	2.5246e-10	[4.56; 14.59]
2	exome-wide	207	15	7	18481	79.9	1.19171e-10	[24.36; 253.95]
2	1x10-5	207	17	7	18481	63.8	3.53378e-10	[20.38; 188.25]
2	1x10-4	207	30	10	18481	46.2	6.17714e-13	[19.08; 105.25]
2	1x10-3	207	69	14	18481	24	2.82747e-14	[12.11; 44.68]
3	exome-wide	57	15	6	18481	238.1	3.21546e-12	[67.43; 796.85]
3	1x10-5	57	17	6	18481	194.8	7.91337e-12	[57.25; 601.45]
3	1x10-4	57	30	8	18481	135.9	2.72463e-14	[49.78; 339.72]
3	1x10-3	57	69	9	18481	57.3	6.40418e-13	[23.63; 124.93]
Sensitivity analysis using RVAS data based on rare variant masks only (MAF<0.1%)
GWAS genePrio Score Threshold	RVAS P-value Threshold	N GWAS genes	N RVAS genes	N overlapping genes	N total genes	Fisher exact test OR	Fisher exact test P-value	Fisher exact test Confidence interval
0	exome-wide	3247	15	9	18456	7	0.000286959	[2.24; 24.06]
0	1x10-5	3247	16	10	18456	7.8	7.96336e-05	[2.57; 26.23]
0	1x10-4	3247	25	14	18456	6	1.67658e-05	[2.52; 14.57]
0	1x10-3	3247	65	27	18456	3.3	8.58026e-06	[1.96; 5.64]
1	exome-wide	766	15	7	18456	20.4	9.92238e-07	[6.27; 64.47]
1	1x10-5	766	16	8	18456	23.3	8.12773e-08	[7.61; 71.48]
1	1x10-4	766	25	10	18456	15.6	2.65384e-08	[6.24; 37.19]
1	1x10-3	766	65	15	18456	7	4.87361e-08	[3.66; 12.82]
2	exome-wide	207	15	6	18456	60.4	8.51829e-09	[17.52; 192.07]
2	1x10-5	207	16	7	18456	70.7	2.11829e-10	[22.17; 216.11]
2	1x10-4	207	25	9	18456	51.7	4.12662e-12	[19.88; 125.93]
2	1x10-3	207	65	11	18456	18.9	1.4272e-10	[8.77; 37.25]
3	exome-wide	57	15	5	18456	175.4	6.88632e-10	[45.58; 585.62]
3	1x10-5	57	16	6	18456	214.7	5.17426e-12	[61.88; 677.9]
3	1x10-4	57	25	7	18456	142.3	8.42388e-13	[48.13; 380.32]
3	1x10-3	57	65	7	18456	44.2	1.10945e-09	[16.22; 103.7]
Abbreviations: GWAS, genome-wide association study; RVAS, rare variant association study; MAF, minor allele frequency; N, number; OR, odds ratio

## Sheet: ST8 BHR N_variants
Supplementary Table 8: Number of variants analyzed using BHR in UK Biobank and All of Us
Cohort	Annotation	Rare (1.0 × 10-5 < MAF < 1.0 × 10-3)	Ultra-rare (MAF < 1.0 × 10-5)
UKB	PTV	62392	609983
	Missense (damaging)	194863	1479282
	Missense (non-damaging)	720914	3621716
	Synonymous	405751	2008624
AoU	PTV	64253	56758
	Missense (damaging)	213252	172629
	Missense (non-damaging)	858541	553937
	Synonymous	492085	324227
Abbreviations: PTV, protein-truncating variant; UKB, UK Biobank; AoU, All of Us Research Program

## Sheet: ST9 BHR h2 in ultrarare and rar
Supplementary Table 9. Burden heritability results for ultrarare and rare variants in the UK Biobank
	Ultrarare						Rare
	Observed-scale			Liability-scale			Observed-scale			Liability-scale
Annotations	h2	se		h2	se		h2	se		h2	se	N of cases	N of controls
PTV	0.00449752	0.00126043		0.0144107	0.00403861		0.000635748	0.000345425		0.00203703	0.00110679	36006	385851
Missense (damaging)	0.00112923	0.000484832		0.00361822	0.00155347		0.00051038	0.000312524		0.00163533	0.00100137	36006	385851
Missense (non-damaging)	-7.84e-05	0.000296928		-0.000251079	0.000951401		-2.7e-05	0.000268172		-8.66e-05	0.000859262	36006	385851
Synonymous	-0.000138374	0.000323598		-0.00044337	0.00103686		0.000541293	0.000313746		0.00173438	0.00100529	36006	385851
Abbreviations: h2, heritability; se, standard error; N, number; PTV, protein-truncating variants

## Sheet: ST10 BHR h2 in each anno
Supplementary Table 10: Burden heritability results for each annotation class across UK Biobank and All of Us datasets
Cohort	High-confidence PTV						Missense (any)						Missense (Alpha Missense)						Missense (REVEL)						Missense (PrimateAI-3D)						Missense (non-damaging)						Synonymous					N of cases	N of controls
	Observed-scale			Liability-scale			Observed-scale			Liability-scale			Observed-scale			Liability-scale			Observed-scale			Liability-scale			Observed-scale			Liability-scale			Observed-scale			Liability-scale			Observed-scale			Liability-scale
	h2	se		h2	se		h2	se		h2	se		h2	se		h2	se		h2	se		h2	se		h2	se		h2	se		h2	se		h2	se		h2	se		h2	se
UKB EUR	0.00513326	0.00131402		0.0164477	0.00421032		0.00163961	0.000543389		0.00525355	0.0017411		0.00185444	0.000591658		0.00594189	0.00189576		0.000957402	0.000384086		0.00306765	0.00123067		0.00100071	0.000480128		0.00320644	0.0015384		-0.000105392	0.00039992		-0.000337691	0.0012814		0.000402919	0.000419371		0.00129101	0.00134373	36006	385851
AoU EUR	0.00521603	0.00159884		0.0136203	0.00417496		0.00113267	0.00124796		0.00295769	0.00325874		0.00237957	0.00160824		0.00621364	0.00419951		0.00039129	0.000942775		0.00102176	0.00246182		0.00151792	0.000991592		0.00396365	0.00258929		0.00225446	0.00120832		0.00588695	0.00315522		-0.000403558	0.00116379		-0.00105379	0.00303894	14816	148109
AoU AFR	0.0124901	0.00435493		0.0458636	0.0159913		0.00613329	0.00412646		0.0225215	0.0151524		-0.00155649	0.00441495		-0.00571546	0.0162117		-7.6e-05	0.00247104		-0.000278904	0.00907366		0.00484766	0.00273166		0.0178006	0.0100307		0.000598445	0.00342625		0.00219749	0.0125812		0.00644844	0.0043057		0.0236787	0.0158105	2576	51211
Abbreviations: PTV, protein-truncating variants; h2, heritability; se, standard error; UKB, UK Biobank; AoU, All of Us Research Program; EUR, European genetic ancestry; AFR, African genetic ancestry

[truncated: 1 more sheets: ST11 BHR h2 by sig genes]
